# Supplementary material for: Ruthenium(v) terminal arylimido corroles: isolation, spectroscopic characterization and reactivity
Source: Royal Society of Chemistry journal article supplement (doi:10.1039/d3sc02266h), 2023-01-01
Supplement: d3sc02266h1.pdf [file d3sc02266h1.pdf]

## Electronic Supplementary Information

### Table of contents

|                                                                                                                                                                      |     |
|----------------------------------------------------------------------------------------------------------------------------------------------------------------------|-----|
| Abbreviations.....                                                                                                                                                   | S3  |
| General .....                                                                                                                                                        | S4  |
| General procedure for EPR spectroscopy.....                                                                                                                          | S5  |
| Synthesis of aryl azides .....                                                                                                                                       | S5  |
| Synthesis of 5-phenyldipyrromethane.....                                                                                                                             | S5  |
| Synthesis of H <sub>3</sub> ( <sup>t</sup> Bu-Cor).....                                                                                                              | S6  |
| Synthesis of [Ru <sup>III</sup> ( <sup>t</sup> Bu-Cor)] <sub>2</sub> ( <b>1</b> ).....                                                                               | S6  |
| Synthesis of <b>2</b> .....                                                                                                                                          | S7  |
| Synthesis of Ru(V)-arylimido corroles ( <b>3</b> ) .....                                                                                                             | S7  |
| General procedure of stoichiometric aziridination/C–H amination .....                                                                                                | S8  |
| References for the reported compounds.....                                                                                                                           | S10 |
| Hammett analysis.....                                                                                                                                                | S12 |
| KIE experiment.....                                                                                                                                                  | S12 |
| Computational details .....                                                                                                                                          | S13 |
| <b>Fig. S1</b> ORTEP drawing of <b>1</b> .....                                                                                                                       | S14 |
| <b>Table S1</b> X-ray crystallographic data of <b>1</b> .....                                                                                                        | S15 |
| <b>Table S2</b> Selected bond distances and angles of <b>1</b> .....                                                                                                 | S16 |
| <b>Fig. S2</b> <sup>1</sup> H NMR spectrum of <b>1</b> in CDCl <sub>3</sub> at 298 K. ....                                                                           | S17 |
| <b>Fig. S3</b> Cyclic voltammogram of <b>1</b> in CH <sub>2</sub> Cl <sub>2</sub> at 298 K.....                                                                      | S18 |
| <b>Fig. S4</b> UV-vis spectra of <b>1</b> and <b>2</b> . ....                                                                                                        | S19 |
| <b>Fig. S5</b> UV–vis spectra of Ru(V)-arylimido corroles in benzene. ....                                                                                           | S20 |
| <b>Fig. S6</b> MALDI-TOF MS spectra of <b>1</b> , a crude mixture of <b>1</b> and MesN <sub>3</sub> ,<br>and a crude mixture of <b>2</b> and MesN <sub>3</sub> ..... | S21 |
| <b>Fig. S7</b> MADLI-TOF MS spectra showing the experimental isotope patterns of <b>3a</b><br>and <sup>14,15</sup> N- <b>3a</b> .....                                | S22 |

|                                                                                                                                                                                                                                                                          |     |
|--------------------------------------------------------------------------------------------------------------------------------------------------------------------------------------------------------------------------------------------------------------------------|-----|
| <b>Fig. S8</b> MADLI-TOF MS spectra before and after addition of PPh <sub>3</sub> to <b>3a</b> .....                                                                                                                                                                     | S23 |
| <b>Fig. S9</b> a) HR-ESI-MS spectrum of PPh <sub>3</sub> =NMe <sub>s</sub> generated from the reaction between <b>3a</b> and PPh <sub>3</sub> . b) HR-ESI-MS spectra showing the experimental and simulated isotope patterns of PPh <sub>3</sub> =NMe <sub>s</sub> ..... | S24 |
| <b>Fig. S10</b> MADLI-TOF MS spectra showing the experimental and simulated isotope patterns of <b>3b</b> .....                                                                                                                                                          | S25 |
| <b>Fig. S11</b> MADLI-TOF MS spectra showing the experimental and simulated isotope patterns of <b>3d</b> .....                                                                                                                                                          | S26 |
| <b>Fig. S12</b> HR-ESI-MS spectra showing the experimental and simulated isotope patterns of <b>3a</b> .....                                                                                                                                                             | S27 |
| <b>Fig. S13</b> HR-ESI-MS spectra showing the experimental and simulated isotope patterns of <b>3b</b> .....                                                                                                                                                             | S28 |
| <b>Fig. S14</b> HR-ESI-MS spectra showing the experimental and simulated isotope patterns of <b>3c</b> .....                                                                                                                                                             | S29 |
| <b>Fig. S15</b> Hammett correlation for the aziridination of <i>para</i> -substituted styrenes mediated by <b>3d</b> using a single-parameter method ( $\sigma^+$ ).....                                                                                                 | S30 |
| <b>Table S3</b> Comparison between the DFT-calculated <i>g</i> values and the ones based on experimental EPR spectra.....                                                                                                                                                | S31 |
| <b>Table S4.</b> Selected examples of the structural and electronic information of Ru-imido (Ru(NR)) species.....                                                                                                                                                        | S31 |
| <b>Fig. S16</b> X-band EPR spectra of <b>3a</b> (experimental and simulated) recorded at 100 K.....                                                                                                                                                                      | S32 |
| <b>Fig. S17</b> X-band EPR spectra of <b>3b</b> (experimental and simulated) recorded at 100 K.....                                                                                                                                                                      | S33 |
| <b>Fig. S18</b> DFT-calculated molecular orbital energy diagrams of <b>3a</b> and <b>3b</b> .....                                                                                                                                                                        | S34 |
| <b>Fig. S19</b> Spin density plot (contour value: 0.01) for <b>3b</b> obtained from the CASSCF calculation.....                                                                                                                                                          | S35 |
| <b>Fig. S20</b> DFT-calculated reaction profile of <b>3d</b> -mediated aziridination of <i>cis</i> -stilbene.....                                                                                                                                                        | S36 |
| <b>Fig. S21</b> a) KIE experiment for the reaction of <b>3d</b> with tetralin. b) Isotope pattern of the aminated products by GC-MS. ....                                                                                                                                | S37 |
| NMR spectra of the organic starting materials and products.....                                                                                                                                                                                                          | S38 |
| Cartesian coordinates for DFT calculations .....                                                                                                                                                                                                                         | S45 |
| References.....                                                                                                                                                                                                                                                          | S58 |

## Abbreviations

COD = 1,5-cyclooctadiene

Cor = corrole trianion

KC<sub>8</sub> = potassium graphite

Mes = 2,4,6-trimethylphenyl or mesityl

Dipp = 2,6-diisopropylphenyl

Tipp = 2,4,6-triisopropylphenyl

DCP = 2,6-dichlorophenyl

BTF = 3,5-*bis*(trifluoromethyl)phenyl

TBP = 4-*tert*-butyl-phenyl

EA = ethyl acetate

KIE = kinetic isotope effect

## General

ATR-FTIR spectra were recorded using a "Spectrum Two<sup>TM</sup>" spectrometer (manufacturer: PerkinElmer; detector: LiTaO<sub>3</sub>). Resonance Raman experiments were carried out according to the procedure reported elsewhere.<sup>1,2</sup> X-band EPR spectroscopy was performed using a Bruker EMXplus-10/12 instrument (microwave frequency: 9.27-9.60 GHz; power: 2-20 mW; power attenuation: 10-20 dB; ModAmp: 2-4 G; ModFreq: 100.00 kHz). NMR experiments were conducted using DPX-600, DPX-500, or DPX-400 spectrometer. UV-vis and GC-MS spectra were acquired by a Cary 8454 spectrometer and Agilent 7890B GC system (5977A MS detector; GC-MS temperature profile: 0-10 min: 60 °C, 10-20 min: 20 °C/min, 20-21 min: 260 °C), respectively, manufactured by Agilent Technologies. A maXis II UHR-TOF mass spectrometer (Bruker) was used to record HR-ESI-MS spectra.

The X-ray diffraction data were collected on a Bruker PLATINUM135 CCD detector with monochromated Cu-K $\alpha$  radiation at 100 K or a Bruker SMART 1000 CCD detector with graphite monochromated Mo-K $\alpha$  radiation. Cell refinement and data reduction were processed with the Protenum2 program package.<sup>3</sup> By using SHELXTL, the structure was solved with the ShelXS6 structure solution program using direct methods and refined with the XL refinement package using least squares minimization.<sup>4</sup> All non-hydrogen atoms were refined with anisotropic thermal parameters. The hydrogen atoms were included in idealized positions and refined with fixed geometry with respect to their carrier atoms.

All chemicals were used as received unless otherwise specified. <sup>15</sup>N-Sodium azide (Na<sup>+</sup>[<sup>15</sup>N $\equiv$ NN]<sup>-</sup> & Na<sup>+</sup>[NN $\equiv$ <sup>15</sup>N]<sup>-</sup>; 98 atom%), D<sub>2</sub>O, *d*<sub>8</sub>-THF, C<sub>6</sub>D<sub>6</sub> and CDCl<sub>3</sub> were purchased from Cambridge Isotope Laboratories. *d*<sub>8</sub>-THF and C<sub>6</sub>D<sub>6</sub> were dried over 3 and 4 Å molecular sieves, respectively (activated in a 350 °C furnace for 3 h and spontaneous cooling in a small antechamber of glovebox under dynamic vacuum for 2 h), followed by five freeze-thaw cycles. Benzene (pre-treated with conc. H<sub>2</sub>SO<sub>4</sub> to remove any reductant(s)) was dried and distilled over Na cubes/benzophenone (deep blue in colour), followed by three freeze-thaw cycles and stored over 4 Å molecular sieves. Anhydrous THF (J & K Scientific) was deaerated by five freeze-thaw cycles and stirred with shiny Li granules (Merck, 99% trace metals basis without paraffin oil; 20% w/v) under argon for 48 h and stored over 3 Å molecular sieves. Pentane was stirred with shiny Li granules (10% w/v) under argon for 24 h and stored over 4 Å molecular sieves. All the anhydrous solvents were tested with a purple sodium ketyl indicator dissolved in THF (qualified solvents should result in no colour change upon mixing), similar to the literature procedure.<sup>5</sup> Potassium graphite (KC<sub>8</sub>) was purchased from Strem Chemical, INC. and stored at -35 °C freezer inside the glovebox. InCl<sub>3</sub>, benzaldehyde, 3,4,5,6-tetrachloro-1,2-benzoquinone (TCQ), 2,4,6-trimethylphenylboronic acid, 2,4,6-triisopropylphenylboronic acid, styrene, 1,1-diphenylethylene,  $\alpha$ -methylstyrene, *cis*-stilbene, cyclohexene, cyclohexa-1,4-diene, triphenylphosphine, indane, tetralin, isochroman, indene, ferrocene, 4-*tert*-butyl-benzaldehyde, phthalane, 10% Pd on activated charcoal were used as received from commercial vendors without further purification. Pyrrole was freshly distilled prior to use for the synthesis of 5-phenyldipyrromethane. *d*<sub>4</sub>-Tetralin (ca. 90% *d*-content at the benzylic positions) was prepared according to the literature method.<sup>6</sup> Except for the synthesis of 5-phenyldipyrromethane, corrole ligand and

[Ru<sup>III</sup>(<sup>t</sup>Bu-Cor)]<sub>2</sub>, all the reactions were conducted using sealed Schlenk tubes, which were dried in a 120 °C oven overnight and subsequently placed into high-vacuum antechamber for further drying (16 h). The reactions involving the highly reducing species **2** were all performed using Pyrex® spinbars (dried in a similar way as glassware). 2-mL polypropylene centrifuge tubes (Thomas Scientific) were used for the preparation of **2** to remove (potassium) graphite whereas polytetrafluoroethylene (PTFE, 0.22 or 0.45 μm) filters were used for the purification of Ru(V)-arylimido species. Glass Pasteur pipettes and gas tight EPR tubes were dried in antechamber for 24 h and placed in a well-circulated glovebox for one week prior to use.

### General procedure for EPR spectroscopy

A typical EPR sample was prepared by dissolving ca. 1.0 μmol of Ru(V)-imido corrole with dry and deaerated benzene and transferring the solution (total volume: 200-400 μL) to a gas-tight EPR tube inside a glovebox. For cryogenic samples, the tube was then taken out of the glovebox, followed by immersing into a liquid nitrogen bath until frozen. The frozen sample was placed in a sample holder of EPR instrument after removal of ice on the surface of EPR tube. Spectral simulation was carried out using the EasySpin toolbox.<sup>7</sup>

### Synthesis of aryl azides

General method A (not applicable for terminal <sup>15</sup>N-labelling as C<sub>Ar</sub>-N is not cleaved<sup>8</sup>): Aniline (DippNH<sub>2</sub>, BTFNH<sub>2</sub>, DCPNH<sub>2</sub>, TBPNH<sub>2</sub> or MesNH<sub>2</sub>) was diazotized using HCl(aq) + NaNO<sub>2</sub>(aq) according to the reported procedure for preparation of aryl azides.<sup>9</sup> The aryl azide was obtained by extracting the reaction mixture with Et<sub>2</sub>O four times (15 mL each). If applicable, the azide was further purified by column chromatography with silica as a stationary phase and *n*-hexane or EA/*n*-hexane as an eluent.

General method B (suitable for <sup>15</sup>N-labelling): According to another reported method for preparing aryl azides,<sup>10</sup> arylboronic acid (MesB(OH)<sub>2</sub> or TippB(OH)<sub>2</sub>; 3 mmol) was dissolved in methanol (10 mL) containing Cu(OAc)<sub>2</sub> (0.3 mmol) and non-labelled NaN<sub>3</sub> (4.5 mmol; or <sup>15</sup>N-labelled NaN<sub>3</sub>). The reaction mixture was stirred under aerobic conditions until a nearly colourless mixture was obtained. The mixture was concentrated to dryness under high vacuum prior to flash column chromatography with *n*-hexane as an eluent and silica as a stationary phase.

For characterization data of DippN<sub>3</sub>,<sup>11</sup> BTFN<sub>3</sub>,<sup>9,12</sup> DCPN<sub>3</sub>,<sup>13</sup> TBPN<sub>3</sub>,<sup>14</sup> MesN<sub>3</sub>,<sup>9,15</sup> and TippN<sub>3</sub>,<sup>16</sup> see the corresponding literature reports.

### Synthesis of 5-phenyldipyrromethane

To an oven-dried two-neck round bottom flask, benzaldehyde (1.3 mL, 13 mmol) and pyrrole (40 mL, 580 mmol) were added and mixed thoroughly, followed by purging the solution with a positive argon flow for 10 min. After that, anhydrous InCl<sub>3</sub> (1.3 mmol) was added. The reaction mixture was stirred for 1.5 h prior to quenching by NaOH<sub>(s)</sub> (2.5 g, 63 mmol). The reaction was stirred for additional 45 min before quick

filtration and subsequent vacuum distillation at temperature not greater than 50 °C. The viscous mixture was first dissolved with minimal amount of MeOH, followed by precipitation with brine and then washed with deionized water 3 times. The beige solid obtained was then dried under high vacuum (84% yield).

**5-Phenyldipyrromethane:**  $^1\text{H}$  NMR (400 MHz,  $\text{CDCl}_3$ , 298 K):  $\delta$  5.48 (s, 1H), 5.98 (s, 2H), 6.24 (d, 2H), 6.69 (s, 2H), 7.27 (d, 2H), 7.32–7.42 (m, 3H), 7.84 (s, 2H); FAB-MS ( $\text{C}_{15}\text{H}_{14}\text{N}_2$ ,  $[\text{M}]^+$ ):  $m/z$  222.1. For other characterizations, please refer to the literature data.<sup>17</sup>

### Synthesis of $\text{H}_3(\text{tBu-Cor})$

In a typical experiment, 5-phenyldipyrromethane (2 mmol, 444 mg) and 4-*tert*-butylbenzaldehyde (1 mmol) were dissolved in  $\text{CH}_2\text{Cl}_2$  (250 mL). Under stirring, trifluoroacetic acid (0.015 mmol, 1.15  $\mu\text{L}$ ) was added with a syringe. The reaction was stirred at RT in the absence of light. After 5 h, the reaction mixture was treated with TCQ (3 mmol, 738 mg) dissolved in toluene, followed by stirring in the dark for 45 min. After removal of the volatile(s), the crude product was purified by silica gel column chromatography using  $\text{CH}_2\text{Cl}_2/n$ -hexane ( $v/v = 1:3$ ; the first greenish band) as an eluent.

**$\text{H}_3(\text{tBu-Cor})$ :** Yield: 10%;  $^1\text{H}$  NMR (400 MHz,  $\text{CDCl}_3$ , 298 K; aromatic protons resolved at <0.5 mM):  $\delta$  1.36 (s, 9H), 7.54-7.56 (d, 2H), 7.72-7.74 (t, 4H), 7.80-7.82 (t, 2H), 8.17-8.19 (d, 2H), 8.36-8.38 (d, 4H), 8.55-8.57 (d, 2H), 8.61-8.62 (d, 2H), 8.88-8.89 (d, 2H), 8.99-9.00 (d, 2H); FAB-MS ( $\text{C}_{41}\text{H}_{34}\text{N}_4$ ,  $[\text{M}]^+$ ):  $m/z$  582.2; UV-vis ( $\text{CH}_2\text{Cl}_2$ ):  $\lambda_{\text{max}}$  421, 644 nm.

### Synthesis of $[\text{Ru}^{\text{III}}(\text{tBu-Cor})]_2$ (1)

$\text{H}_3(\text{tBu-Cor})$  (0.13 mmol) and  $[\text{Ru}(\text{COD})\text{Cl}_2]_n$  (0.26 mmol) were added to an oven-dried two-neck flask. The flask was evacuated and filled with argon for three times. Under argon atmosphere, 2-methoxyethanol (40 mL) was added and purged with a positive argon flow for deaeration. The reaction flask was immersed onto a pre-heated oil bath (135 °C), followed by addition of triethylamine (1 mL) when the solution started to boil. The reaction was terminated after 30 min. After that, the volatiles were removed under high vacuum. The crude product was purified by silica gel column chromatography using  $\text{CH}_2\text{Cl}_2/n$ -hexane ( $v/v = 1:3$ ) as the eluent, giving the title compound as a black solid.

**$[\text{Ru}^{\text{III}}(\text{tBu-Cor})]_2$  (1):** Yield: 65%.  $^1\text{H}$  NMR (400 MHz,  $\text{CDCl}_3$ , 298 K; integral per Ru corrole):  $\delta$  1.66 (s, 9H), 7.18 (d, 1H), 7.31 (br, 2H), 7.49–7.54 (m, 3H), 7.74 (t, 2H), 7.89–7.94 (m, 3H), 8.33 (d, 2H), 8.39 (d, 2H), 8.58 (d, 2H), 8.75 (d, 2H), 8.92 (d, 1H), 9.06 (s, 2H); UV-vis (THF):  $\lambda_{\text{max}}$  ( $\epsilon \times 10^{-4}$ ): 329, 399, 538 nm; HR-ESI-MS ( $\text{C}_{82}\text{H}_{62}\text{N}_8\text{Ru}_2$ ):  $m/z$  calcd for 1362.3157, found: 1362.3215; elemental analysis for  $\text{C}_{82}\text{H}_{62}\text{N}_8\text{Ru}_2 \cdot 2\text{H}_2\text{O} \cdot 2\text{CH}_2\text{Cl}_2$ , calcd (found): C, 64.37 (64.48); H, 4.50 (4.37); N, 7.15 (7.20).

## Synthesis of **2**

To an oven-dried Schlenk tube (containing a Pyrex<sup>®</sup> spinbar) was added [Ru<sup>III</sup>(<sup>t</sup>Bu-Cor)]<sub>2</sub> (10 mg, 7.34 μmol) together with excess KC<sub>8</sub> (8 mg; 4 equiv). The flask was then charged with THF (anhydrous and rigorously deaerated, 4 mL). A glassy stopper equipped with a Glindemann PTFE sealing ring was used to seal the tube tightly (or a sealed tube could be used instead; the solution should not be in contact with parts made of PTFE). The red solution was stirred gently at RT overnight, followed by centrifugation using a mini centrifuge placed inside the glovebox to remove precipitate. The resulting brown solution was transferred to another Schlenk tube and evaporated to dryness under high vacuum inside the glovebox. If necessary, the solid was further washed with benzene (1 mL) until the benzene solution became colourless.

**2** (assigned as K<sub>2</sub>[Ru(<sup>t</sup>Bu-Cor)]<sub>2</sub>): Yield: 76%. UV-vis (THF): λ<sub>max</sub> 411, 445, 600 nm; effective magnetic moment (by Evans method): 2.81 μ<sub>B</sub> (*S* = 1); elemental analysis for K<sub>2</sub>C<sub>82</sub>H<sub>62</sub>N<sub>8</sub>Ru<sub>2</sub>•2C<sub>4</sub>H<sub>8</sub>O, calcd (found): C, 68.24 (68.37); H, 4.96 (5.07); N, 7.07 (6.95). Titration of **2** with [Cp<sub>2</sub>Fe]PF<sub>6</sub> generated 2 equiv. of Cp<sub>2</sub>Fe and 1 equiv. of **1**.

## Synthesis of Ru(V)-arylimido corroles (**3**)

Complex **2** (8 mg, 5.56 μmol) suspended in benzene (1 mL) was treated with ArN<sub>3</sub> (2.5 equiv; standard solution was prepared by dissolving 138 μmol ArN<sub>3</sub> in 1000 μL benzene). The reaction was stirred for several minutes using Pyrex<sup>®</sup> spinbar (0.5 h is needed for ArN<sub>3</sub> with Ar = Dipp, Tipp). After that, the solution was filtered using a syringe equipped with PTFE filter (pore size: 0.22 μm). The solvent was removed under high vacuum inside a glovebox. For preparing **3d**, it was first washed with chilled 1:1 benzene/pentane solution (pre-equilibrated at -35 °C freezer overnight), followed by pentane. For other hydrophobic complexes, they were all washed by chilled pentane twice to minimize sample loss (-35 °C). The undissolved solid was subjected to high vacuum for further drying. All the Ru(V)-imido species were freshly prepared as they underwent gradual decomposition upon standing overnight, particularly in solution state. The effective magnetic moments of **3a-3d** were consistently determined to be ca. 1.73 μ<sub>B</sub> (*S* = 1/2; by Evans method) by dissolving the freshly prepared samples in C<sub>6</sub>D<sub>6</sub>.

**[Ru<sup>V</sup>(<sup>t</sup>Bu-Cor)(NMes)] (3a)**: Yield: 36%. UV-vis (benzene): λ<sub>max</sub> 411, 587 nm; HR ESI-MS: *m/z* Calcd for C<sub>50</sub>H<sub>42</sub>N<sub>5</sub>Ru (M<sup>+</sup>): 814.2492, found: 814.2479; Elemental analysis for C<sub>50</sub>H<sub>42</sub>N<sub>5</sub>Ru, calcd. (found): C, 74.36 (74.01); H, 5.20 (5.34); N, 8.60 (8.72).

**[Ru<sup>V</sup>(<sup>t</sup>Bu-Cor)(NDipp)] (3b)**: Yield: 32%. UV-vis (benzene): λ<sub>max</sub> 411, 580 (sh) nm; HR ESI-MS: *m/z* Calcd for C<sub>53</sub>H<sub>48</sub>N<sub>5</sub>Ru (M<sup>+</sup>): 856.2953, found: 856.2975; Elemental analysis for C<sub>53</sub>H<sub>48</sub>N<sub>5</sub>Ru, calcd. (found): C, 74.36 (74.39); H, 5.55 (5.62); N, 8.18 (8.24).

**[Ru<sup>V</sup>(<sup>t</sup>Bu-Cor)(NTipp)] (3c)**: Yield: 25%. UV-vis (benzene): λ<sub>max</sub> 407, 580 (sh) nm; HR ESI-MS *m/z* Calcd

for  $C_{56}H_{54}N_5Ru$  ( $M^+$ ): 898.3423, found: 898.3423; Elemental analysis for  $C_{56}H_{54}N_5Ru$ , calcd. (found): C, 74.89 (74.94); H, 6.06 (6.20); N, 7.80 (7.94).

**[Ru<sup>V</sup>(<sup>t</sup>Bu-Cor)(NBTF)] (3d)**: Yield: 32%. UV-vis (benzene):  $\lambda_{max}$  406, 580 nm; MADLI-TOF MS:  $m/z$  Calcd for  $C_{49}H_{34}F_6N_5Ru$  ( $M^+$ ): 908.176, found: 907.961; Elemental analysis for  $C_{49}H_{34}F_6N_5Ru$ , calcd. (found): C, 64.82 (64.78); H, 3.77 (3.83); N, 7.71 (7.80).

### General procedure of stoichiometric aziridination/C–H amination

In an argon-filled glovebox, an oven-dried seal tube was charged with Ru(V)-imido corrole complex **3** (5.50  $\mu$ mol), substrate (1.65 mmol) and benzene (1 mL) sequentially. The tube was then sealed tightly, and heating was performed using a pre-equilibrated hot plate (85 °C) placed in a fumehood. After 24 h, the reaction mixture was cooled to RT, followed by quantitative analysis. The quantification methods, according to different volatility/thermostability of products, are depicted as follows:

| Entry <sup>[a]</sup> | Qualitative and quantitative analyses             |
|----------------------|---------------------------------------------------|
| 1                    | <sup>1</sup> H NMR                                |
| 2                    | GC-MS, <sup>1</sup> H NMR and <sup>19</sup> F NMR |
| 3, 4                 | <sup>1</sup> H, <sup>19</sup> F NMR               |
| 6                    | GC-MS (compare with authentic standard)           |
| 5, 7, 8, 9, 10, 11   | GC-MS, <sup>19</sup> F NMR                        |

<sup>a</sup> Corresponding to the same entries in the Table 1 of the main text.

### Aziridine characterization

**1-(3,5-Bis(trifluoromethyl)phenyl)-2-(4-chlorophenyl)aziridine**: <sup>1</sup>H NMR (600 MHz, CDCl<sub>3</sub>, 298 K):  $\delta$  2.48-2.50 (d, 1H), 2.56-2.58 (d, 1H), 3.19-3.22 (dd, 1H), 7.30-7.32 (d, 2H), 7.34-7.36 (d, 2H), 7.41 (s, 2H), 7.49 (s, 1H); <sup>13</sup>C NMR (150 MHz, CDCl<sub>3</sub>, 298 K):  $\delta$  38.15, 41.36, 116.16 (q,  $J_{H-F}$  = 3 Hz), 120.59, 122.23 (q,  $J_{H-F}$  = 271 Hz), 127.43, 128.86, 132.17 (q,  $J_{H-F}$  = 33 Hz), 133.71, 136.46, 155.44; <sup>19</sup>F NMR (376 MHz, CDCl<sub>3</sub>, 298 K):  $\delta$  -63.4; HR EI-MS:  $m/z$  Calcd for  $C_{16}H_9ClF_6N$  ( $[M - H]^+$ ): 364.0328, found: 364.0328; GC-MS (EI;  $[M - H]^+$ ): 364 ( $t_R$  = 18.967 min).

**1-(3,5-Bis(trifluoromethyl)phenyl)-2-(4-(trifluoromethyl)phenyl)aziridine**: <sup>1</sup>H NMR (500 MHz, CDCl<sub>3</sub>, 298 K):  $\delta$  2.52-2.53 (d, 1H), 2.61-2.63 (d, 1H), 3.27-3.29 (dd, 1H), 7.42 (s, 2H), 7.50-7.52 (m, 3H), 7.64-7.66 (d, 2H); <sup>19</sup>F NMR (376 MHz, CDCl<sub>3</sub>, 298 K):  $\delta$  -62.05, -63.03; <sup>13</sup>C NMR (125 MHz, 298 K):  $\delta$  38.30, 41.36, 116.31 (q,  $J_{H-F}$  = 3 Hz), 120.55, 122.00 (q,  $J_{H-F}$  = 271 Hz), 122.96 (q,  $J_{H-F}$  = 271 Hz), 125.56 (q,  $J_{H-F}$  = 3 Hz), 126.45, 130.01 (q,  $J_{C-F}$  = 33 Hz), 132.42 (q,  $J_{C-F}$  = 33 Hz), 142.03, 155.20. HR EI-MS:  $m/z$  Calcd for  $C_{17}H_9F_9N$  ( $[M - H]^+$ ): 398.0591, found: 398.0592; GC-MS (EI;  $[M]^+$ ): 398 ( $t_R$  = 17.928 min).



**1-(3,5-Bis(trifluoromethyl)phenyl)-2-(4-fluorophenyl)aziridine:**  $^1\text{H}$  NMR (600 MHz,  $\text{CDCl}_3$ , 298 K):  $\delta$  2.48-2.49 (d, 1H), 2.55-2.56 (d, 1H), 3.21-3.22 (dd, 1H), 7.06-7.08 (d, 2H), 7.33-7.34 (d, 2H), 7.42 (s, 2H), 7.49 (s, 1H);  $^{13}\text{C}$  NMR (150 MHz,  $\text{CDCl}_3$ , 298 K):  $\delta$  38.06, 41.38, 115.51, 115.66, 116.19 (q,  $J_{\text{H-F}} = 3$  Hz), 120.61, 124.07 (q,  $J_{\text{H-F}} = 271$  Hz), 127.67, 132.37 (q,  $J_{\text{H-F}} = 33$  Hz), 133.61, 155.57;  $^{19}\text{F}$  NMR (376 MHz,  $\text{CDCl}_3$ , 298 K):  $\delta$  -62.99, -114.37; HR EI-MS:  $m/z$  Calcd for  $\text{C}_{16}\text{H}_9\text{F}_7\text{N}$  ( $[\text{M} - \text{H}]^+$ ): 349.0701, found: 349.0710.

## References for the reported compounds

| Compound                                                                            | Reference                          |
|-------------------------------------------------------------------------------------|------------------------------------|
| 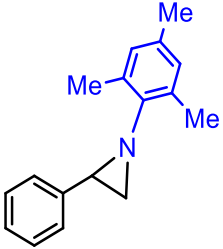   | 9                                  |
|    | X = H, Br<br>19,19<br>X = Me<br>18 |
|   | 20                                 |
|  | 19                                 |
|  | 19,21                              |
|  | 22a                                |
|  | 22b                                |

|                                                                                   |        |
|-----------------------------------------------------------------------------------|--------|
| 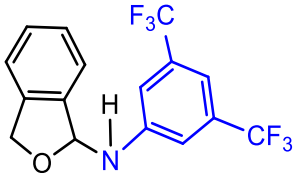 | 20     |
|  | 20,22b |
|  | 23     |

## Hammett analysis

In an argon-filled glovebox, an oven-dried seal tube was charged with Ru(V)-imido corrole complex **3e** (5.50  $\mu\text{mol}$ ), styrene + *para*-substituted styrene *p*-X-C<sub>6</sub>H<sub>4</sub>CH=CH<sub>2</sub> (0.0825 mmol each) and benzene (1 mL) sequentially. The tube was then sealed tightly, and heating was performed using a pre-equilibrated hot plate (85 °C). After 24 h, the reaction mixture was cooled to RT and concentrated by ca. 10 times. The product ratio was determined by GC-MS.

The values for the dual-parameter Hammett plot are shown as follows:

| Substituent X in<br><i>p</i> -X-C <sub>6</sub> H <sub>4</sub> CH=CH <sub>2</sub> | $\sigma_{\text{JJ}}^{\cdot}$ | $\sigma_{\text{mb}}^{\text{a}}$ | $k_{\text{rel}}$ | $\log(k_{\text{rel}})$ |
|----------------------------------------------------------------------------------|------------------------------|---------------------------------|------------------|------------------------|
| H                                                                                | 0                            | 0                               | 1                | 0.00                   |
| Me                                                                               | 0.15                         | -0.29                           | 1.99             | 0.21                   |
| Cl                                                                               | 0.22                         | 0.11                            | 1.09             | 0.04                   |
| Br                                                                               | 0.23                         | 0.13                            | 1.04             | 0.02                   |
| CF <sub>3</sub>                                                                  | -0.01                        | 0.49                            | 0.52             | -0.28                  |

<sup>a</sup> Values from literature report.<sup>24</sup>

## KIE experiment

The procedure is similar to that for the Hammett analysis, except that equimolar amounts of tetralin and *d*<sub>4</sub>-tetralin, instead of styrenes, were used. The product ratio was determined by GC-MS.

## Computational details

DFT (density functional theory) and CASSCF (complete active space self-consistent field) calculations were performed using Gaussian 09 Revision D.01 (Gaussian Inc., Wallingford CT, **2013**). Geometries were optimized using the B3LYP functional<sup>25,26</sup> with a mixed basis set (BSI) combining the SDD pseudopotential and corresponding basis set<sup>27,28</sup> for Ru and the all-electron 6-31G\* basis set for other atoms. Frequency calculations were carried out at the same B3LYP/BSI level. Raman spectra (scaled by 0.9520), spin density plots and bond order were generated by using Multiwfn.<sup>29</sup> Solvent effect was included by means of the polarizable continuum model (PCM).<sup>30</sup> In the reaction mechanism calculations, single-point energy correction with a larger basis set 6-311G\*\* for C, H, N and F was used. The EPR *g*-tensors calculations were performed by ADF2014<sup>31</sup> based on Gaussian 09 optimized structures.

For the CASSCF calculations, an active space consisting of 11 orbitals and 9 electrons was employed, which would yield a total of 10584 electronic configurations to describe the Ru(V)-arylimido species. Specifically, the active space used to give a balanced description of metal-ligand interactions involves the non-bonding  $d_{xy}$  orbital of Ru,  $\sigma$  and  $\sigma^*$  orbitals between Ru- $d_z^2$  and N- $p_z$ , two sets of  $\pi$  and  $\pi^*$  orbitals between Ru- $d_{xz/yz}$  and N- $p_{x/y}$ , and a pair of  $\pi$  and  $\pi^*$  orbitals of the corrole ligand. The ground state configuration reveals a major electronic occupation of  $(d_{xy})^2(d_{\pi(xz)})^2(d_{\pi(yz)})^2(d_{\sigma})^2(d_{\pi(xz)^*})^1(d_{\pi(yz)^*})^0(d_{\sigma^*})^0$  (CI vector, -0.927), and a minor electronic occupation of  $(d_{xy})^2(d_{\pi(xz)})^2(d_{\pi(yz)})^2(d_{\sigma})^2(d_{\pi(yz)^*})^1(d_{\pi(xz)^*})^0(d_{\sigma^*})^0$  (CI vector, 0.188). The major one with singly occupied molecular orbital (SOMO) located on  $d_{\pi(xz)^*}$  shows a greater metal-based character (Ru 48.1% vs  $N_{\text{imido}}$  36.2%), while the minor one with SOMO located on  $d_{\pi(yz)^*}$  is more characteristic of  $N_{\text{imido}}$ -based radical (Ru 44.9% vs  $N_{\text{imido}}$  47.3%). Therefore, it can be concluded that the ground state of **3b** exhibits a major  $Ru^V=NAr$  configuration with a minor  $Ru^{IV}-\bullet NAr$  contribution.

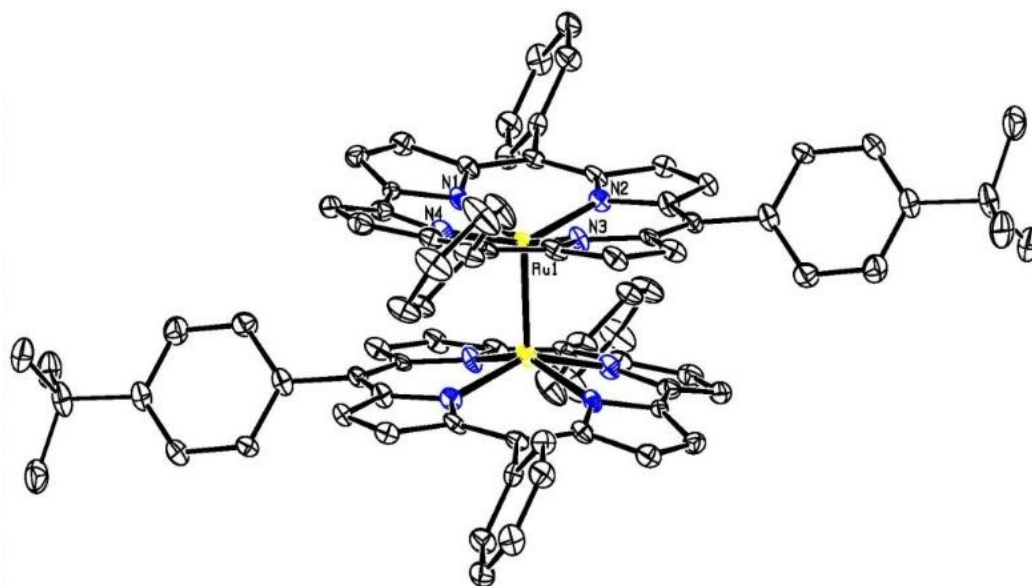

**Fig. S1** ORTEP drawing of **1** at ellipsoid probability level of 30% (hydrogen atoms and solvent molecules were omitted).

**Table S1** X-ray crystallographic data of **1**.

---

|                              |                                                                    |
|------------------------------|--------------------------------------------------------------------|
| Empirical formula            | $C_{82}H_{62}N_8Ru_2 \cdot 2CH_2Cl_2$                              |
| Formula weight               | 1531.38                                                            |
| T [K]                        | 100                                                                |
| Wavelength [Å]               | 1.54178                                                            |
| Crystal system               | monoclinic                                                         |
| Space group                  | $P2_1/c$                                                           |
| $a$ [Å]                      | 10.4207(6)                                                         |
| $b$ [Å]                      | 12.7439(7)                                                         |
| $c$ [Å]                      | 26.3116(13)                                                        |
| $\alpha$ [°]                 | 90                                                                 |
| $\beta$ [°]                  | 93.427(2)                                                          |
| $\gamma$ [°]                 | 90                                                                 |
| $V$ [Å <sup>3</sup> ]        | 3487.9(2)                                                          |
| Z                            | 2                                                                  |
| $\rho$ [g cm <sup>-3</sup> ] | 1.458                                                              |
| $\mu$ [mm <sup>-1</sup> ]    | 5.329                                                              |
| $F(000)$                     | 1564.0                                                             |
| $2\theta$ range [°]          | 6.73 to 135.376                                                    |
| Index ranges                 | $-12 \leq h \leq 12,$<br>$0 \leq k \leq 14,$<br>$0 \leq l \leq 31$ |
| Reflections collected        | 5478                                                               |
| Independent reflections      | 5478                                                               |
| Completeness                 | 0.867                                                              |
| restraints                   | 81                                                                 |
| Goodness-of-fit on $F^2$     | 1.090                                                              |
| $R_1$ (all data)             | 0.0842                                                             |
| $wR_2$ (all data)            | 0.1879                                                             |

---

**Table S2** Selected bond distances (Å) and angles (°) of **1**.

---

|                                                               |            |                                                               |          |
|---------------------------------------------------------------|------------|---------------------------------------------------------------|----------|
| Ru <sub>1</sub> -Ru <sub>1</sub> <sup>1</sup>                 | 2.1842(15) | Ru <sub>1</sub> -N <sub>4</sub>                               | 1.969(8) |
| Ru <sub>1</sub> -N <sub>1</sub>                               | 1.982(7)   | Ru <sub>1</sub> -N <sub>3</sub>                               | 1.992(7) |
| Ru <sub>1</sub> -N <sub>2</sub>                               | 1.996(7)   |                                                               |          |
| N <sub>1</sub> -Ru <sub>1</sub> -Ru <sub>1</sub> <sup>1</sup> | 105.5(2)   | N <sub>1</sub> -Ru <sub>1</sub> -N <sub>2</sub>               | 88.0(3)  |
| N <sub>1</sub> -Ru <sub>1</sub> -N <sub>3</sub>               | 150.2(3)   | N <sub>2</sub> -Ru <sub>1</sub> -Ru <sub>1</sub> <sup>1</sup> | 103.5(2) |
| N <sub>3</sub> -Ru <sub>1</sub> -Ru <sub>1</sub> <sup>1</sup> | 103.5(3)   | N <sub>3</sub> -Ru <sub>1</sub> -N <sub>2</sub>               | 91.9(3)  |
| N <sub>4</sub> -Ru <sub>1</sub> -Ru <sub>1</sub> <sup>1</sup> | 105.8(2)   | N <sub>4</sub> -Ru <sub>1</sub> -N <sub>1</sub>               | 78.4(3)  |
| N <sub>4</sub> -Ru <sub>1</sub> -N <sub>2</sub>               | 150.1(3)   | N <sub>4</sub> -Ru <sub>1</sub> -N <sub>3</sub>               | 87.3(3)  |
| C <sub>1</sub> -N <sub>1</sub> -Ru <sub>1</sub>               | 116.9(6)   | C <sub>4</sub> -N <sub>1</sub> -Ru <sub>1</sub>               | 131.5(6) |
| C <sub>12</sub> -N <sub>2</sub> -Ru <sub>1</sub>              | 126.3(5)   | C <sub>15</sub> -N <sub>2</sub> -Ru <sub>1</sub>              | 124.7(6) |
| C <sub>27</sub> -N <sub>3</sub> -Ru <sub>1</sub>              | 123.4(6)   | C <sub>30</sub> -N <sub>3</sub> -Ru <sub>1</sub>              | 126.4(6) |
| C <sub>38</sub> -N <sub>4</sub> -Ru <sub>1</sub>              | 132.7(7)   | C <sub>41</sub> -N <sub>4</sub> -Ru <sub>1</sub>              | 117.2(6) |

---



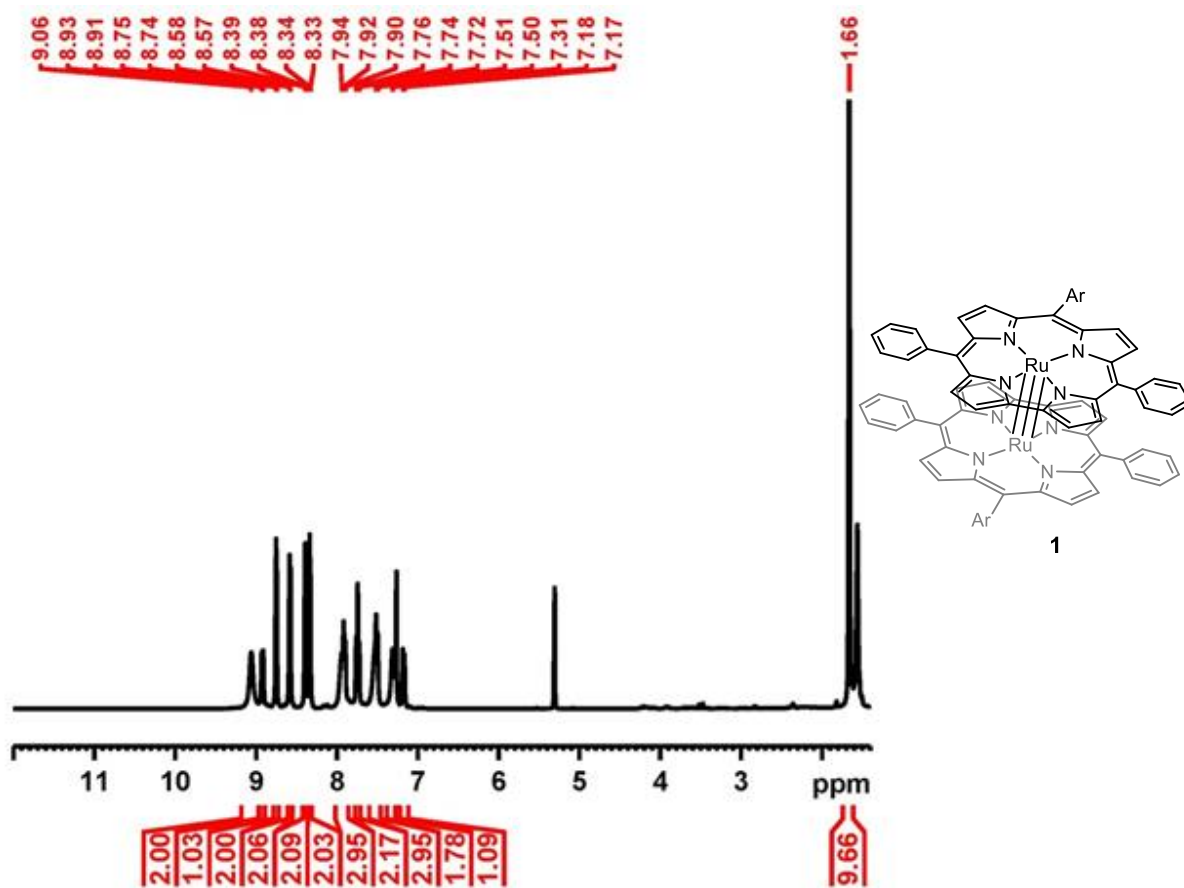

**Fig. S2**  $^1\text{H}$  NMR spectrum of **1** in  $\text{CDCl}_3$  at 298 K.

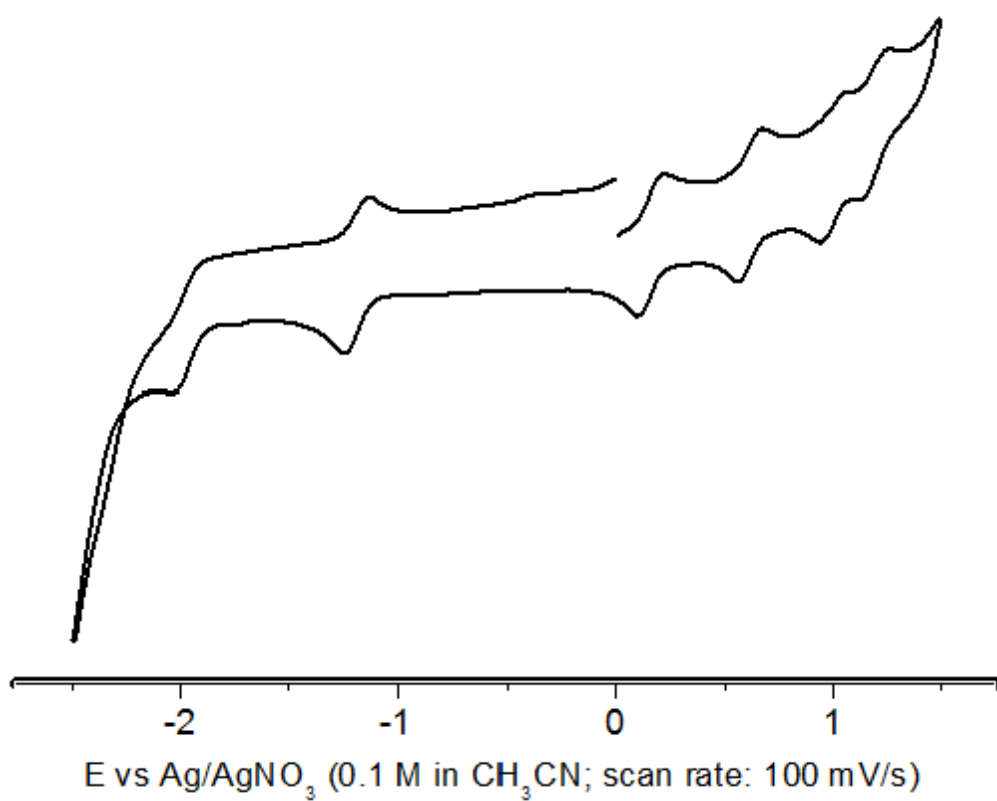

**Fig. S3** Cyclic voltammogram of **1** in CH<sub>2</sub>Cl<sub>2</sub> at 298 K with 0.1 M [tBu<sub>4</sub>N]PF<sub>6</sub> as electrolyte.

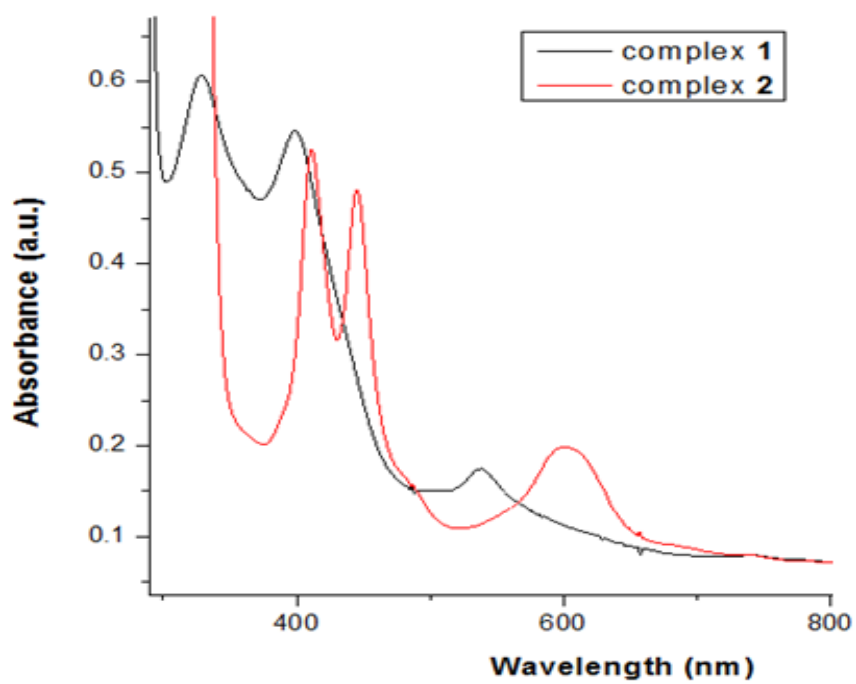

**Fig. S4** UV-vis spectra of complexes **1** and **2** (concentration = 5.45  $\mu$ M, solvent = THF, under Ar).

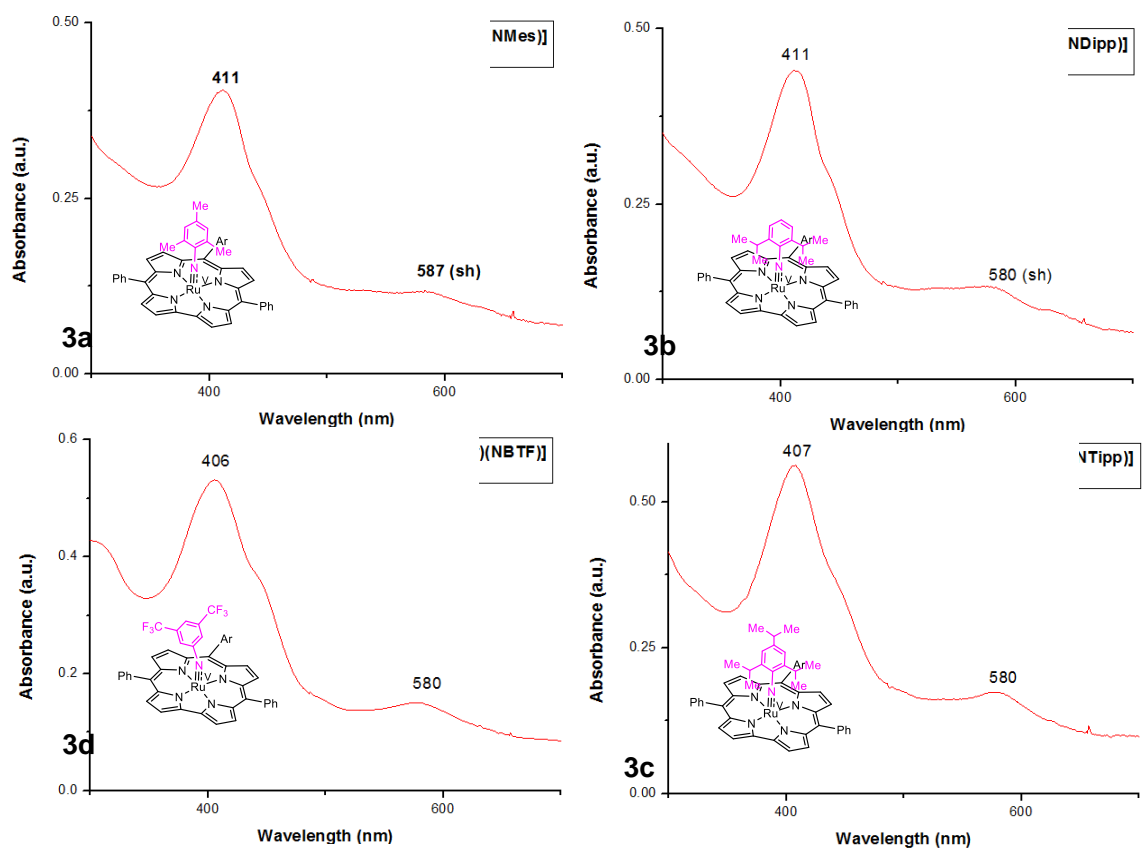

**Fig. S5** UV-vis spectra of Ru(V)-arylimido corroles in benzene under argon.

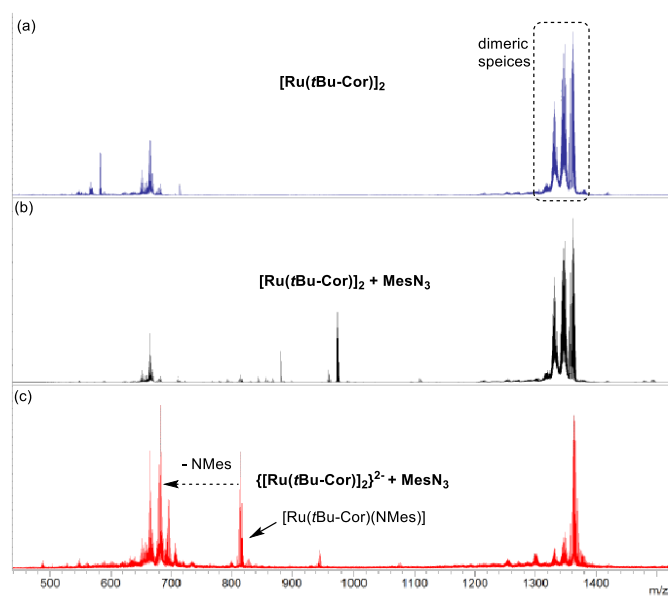

**Fig. S6** MALDI-TOF MS spectra of a) **1**, b) a crude mixture of **1** and MesN<sub>3</sub>, c) a crude mixture of **2** and MesN<sub>3</sub>.

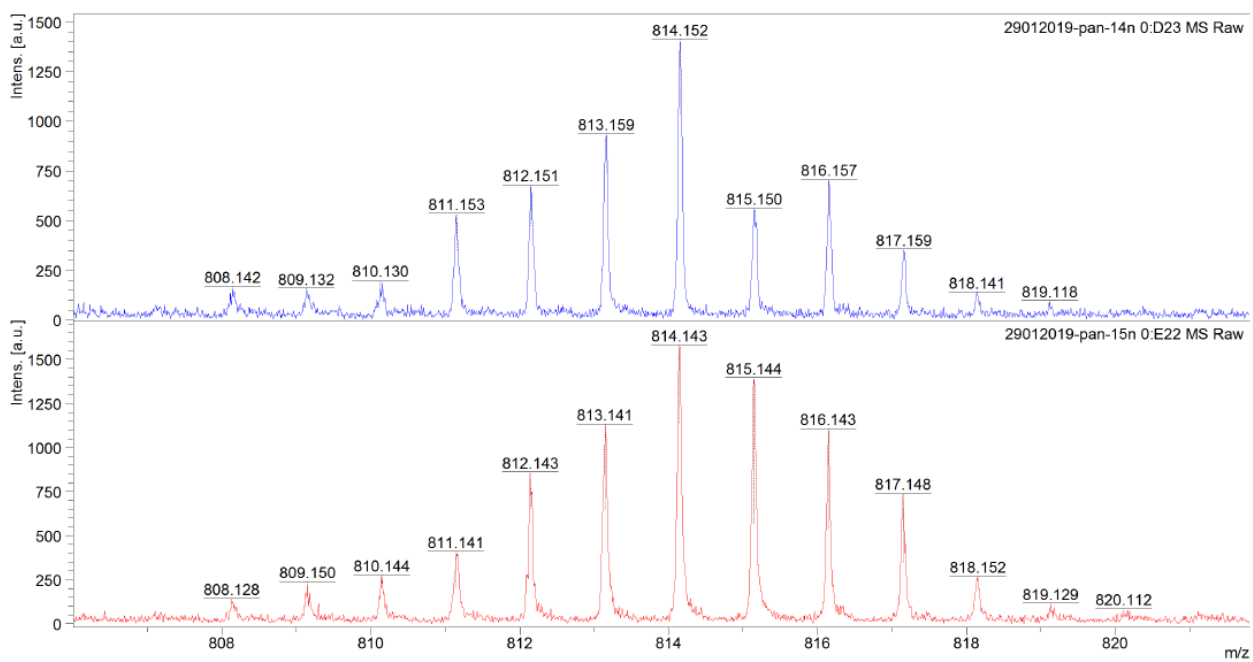

**Fig. S7** MADLI-TOF MS spectra showing the experimental isotope patterns of **3a** (top) and  $^{14,15}\text{N-3a}$  (bottom).

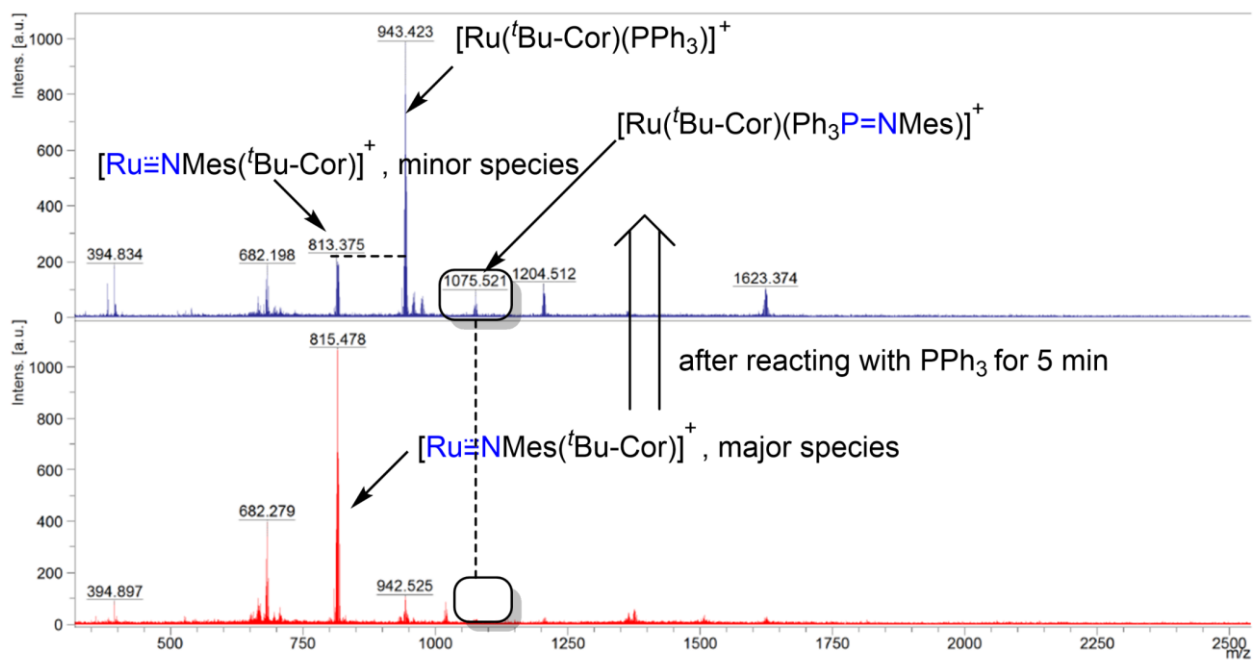

**Fig. S8** MADLI-TOF MS spectra before (bottom) and after (top) addition of  $\text{PPh}_3$  to **3a**.

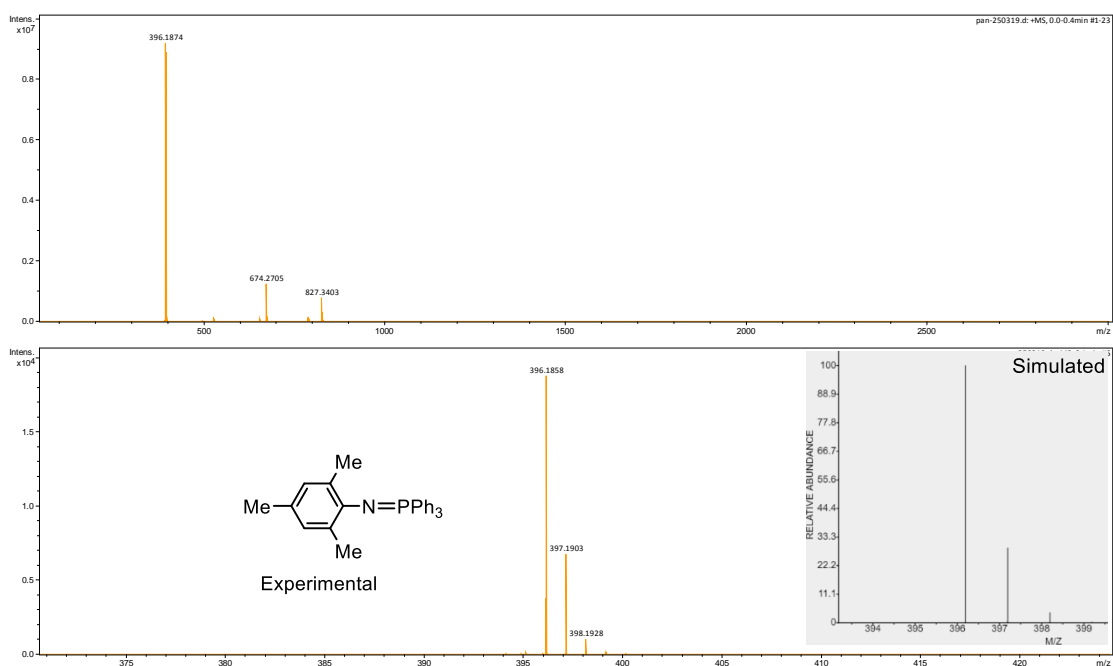

**Fig. S9** a) HR-ESI-MS spectrum of  $\text{PPh}_3=\text{NMe}_3$  generated from the reaction between **3a** and  $\text{PPh}_3$ .  
 b) HR-ESI-MS spectra showing the experimental and simulated isotope patterns of  $\text{PPh}_3=\text{NMe}_3$ .



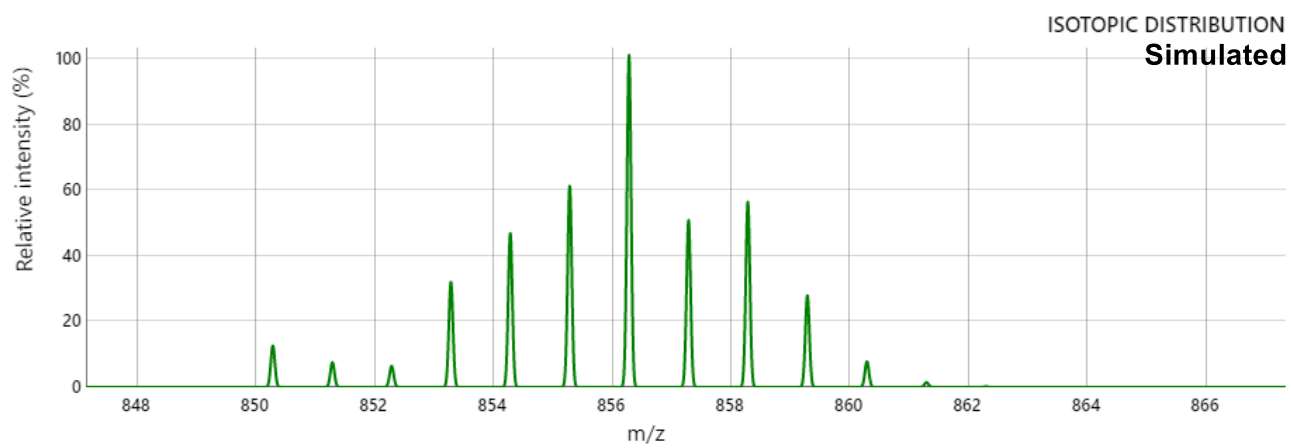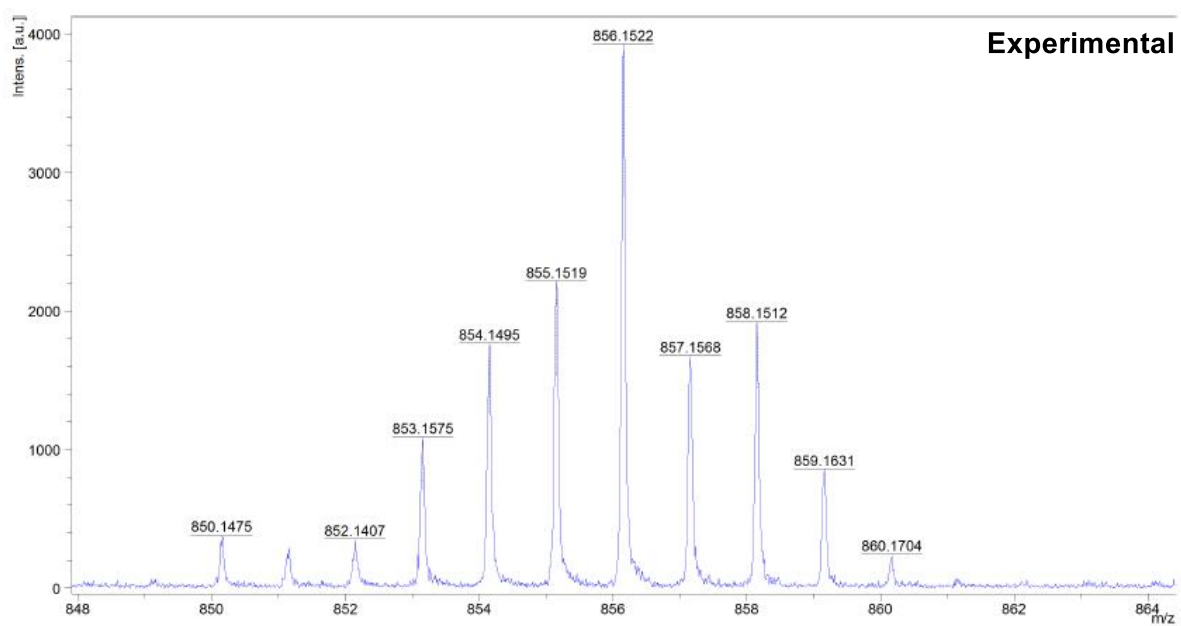

**Fig. S10** MADLI-TOF MS spectra showing the experimental and simulated isotope patterns of **3b**.

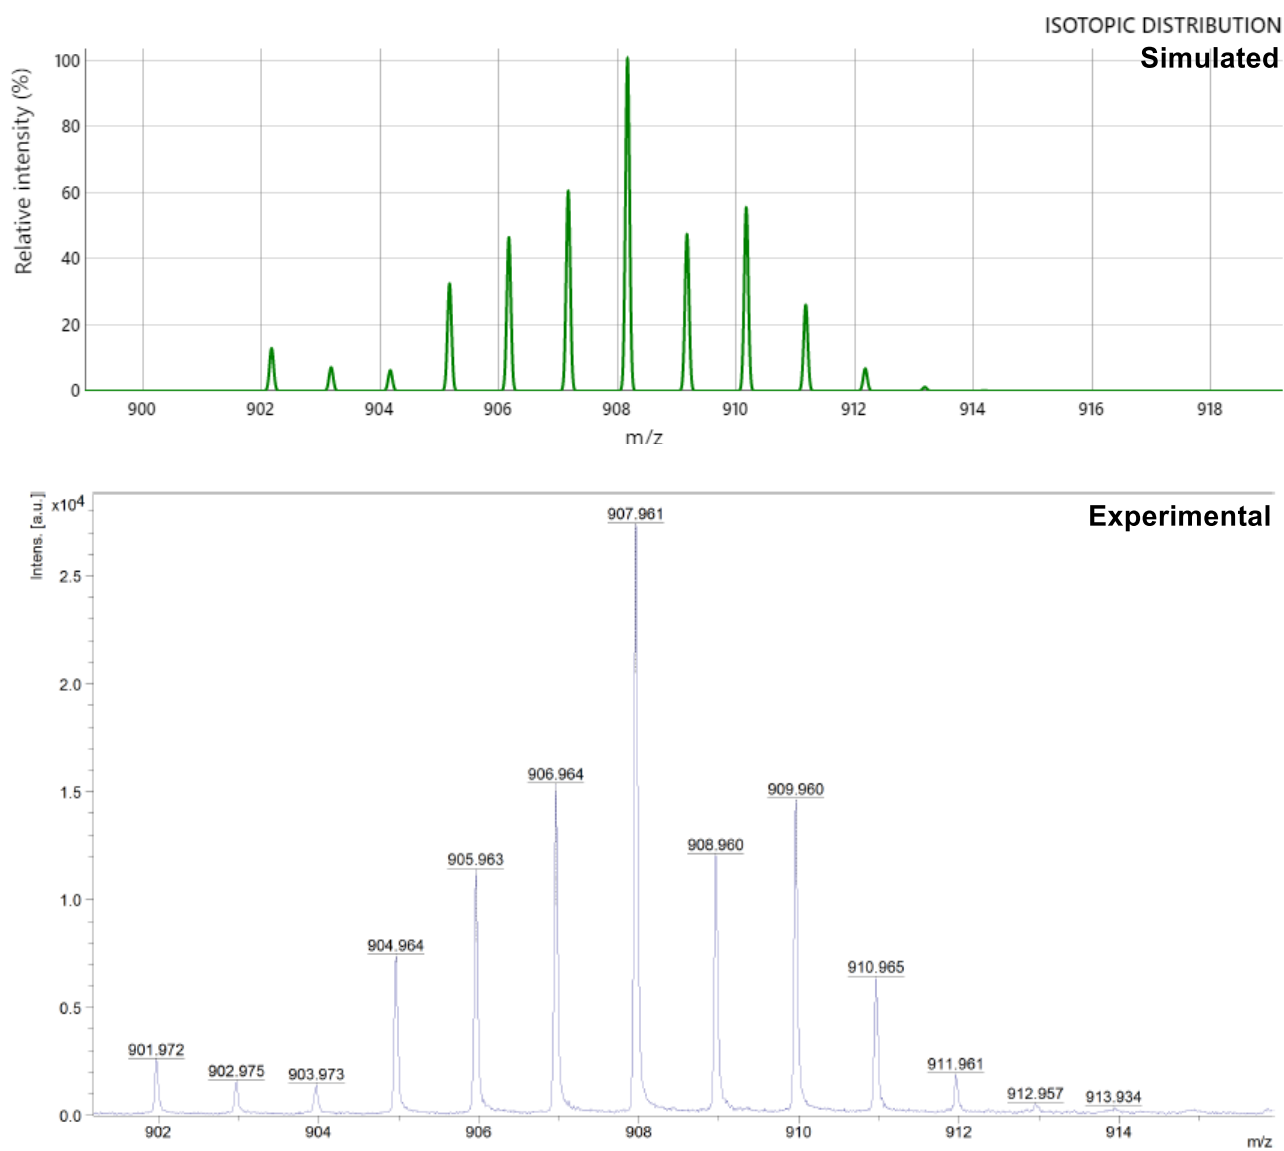

**Fig. S11** MADLI-TOF MS spectra showing the experimental and simulated isotope patterns of **3d**.

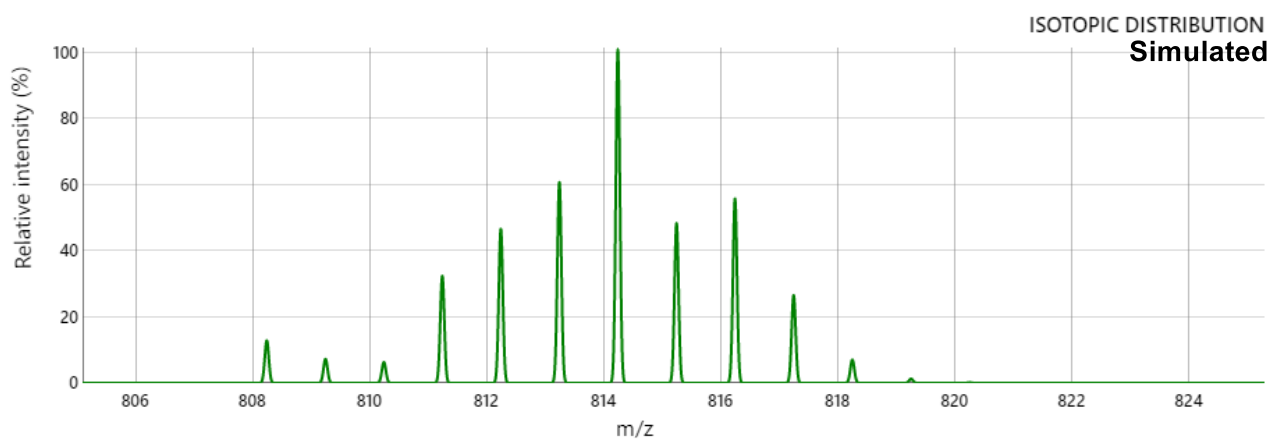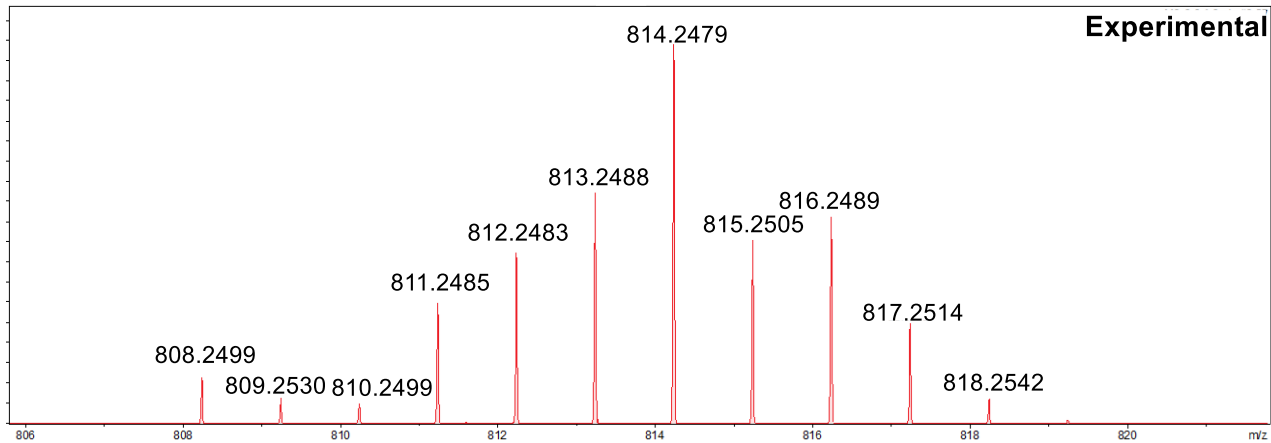

**Fig. S12** HR-ESI-MS spectra showing the experimental and simulated isotope patterns of **3a**.

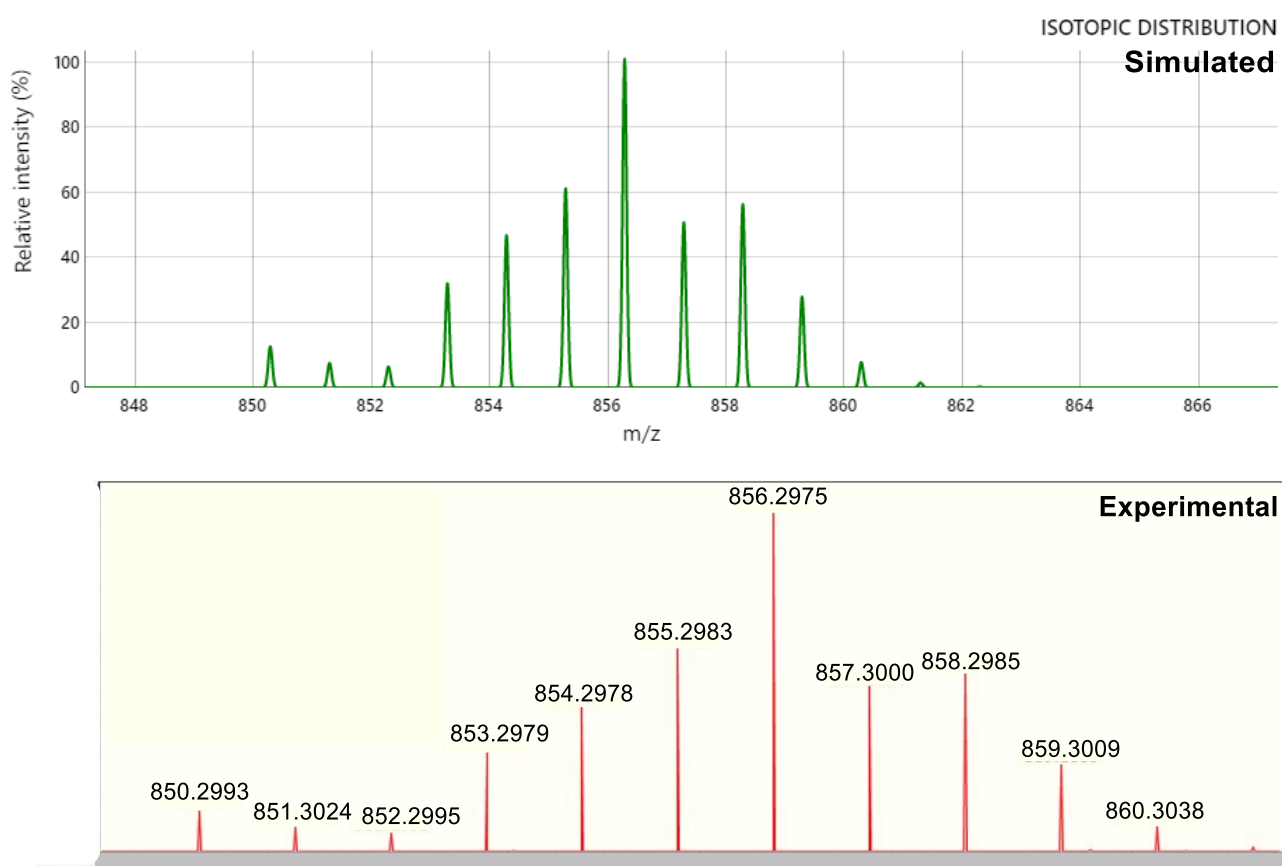

**Fig. S13** HR-ESI-MS spectra showing the experimental and simulated isotope patterns of **3b**.

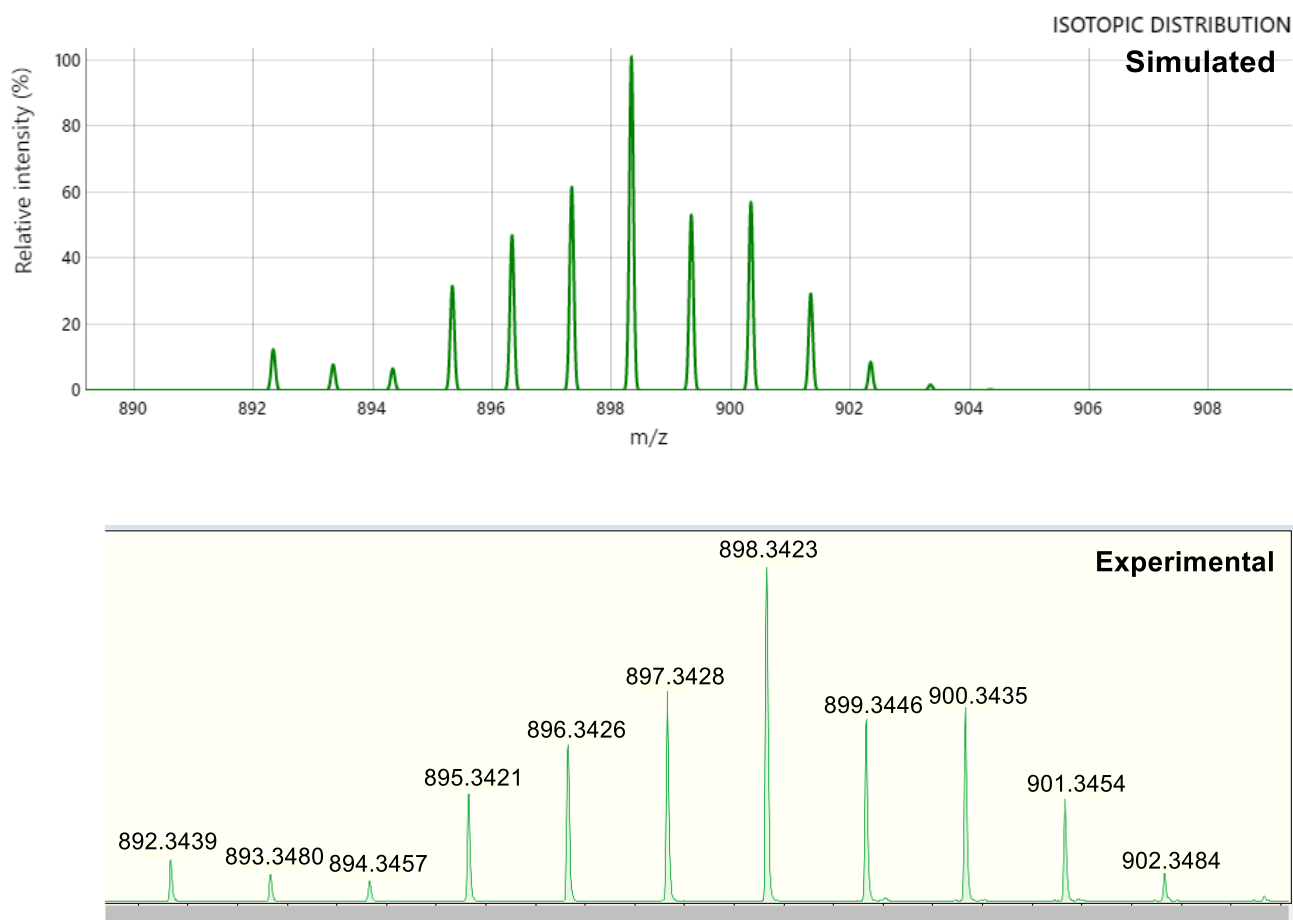

**Fig. S14** HR-ESI-MS spectra showing the experimental and simulated isotope patterns of **3c**.

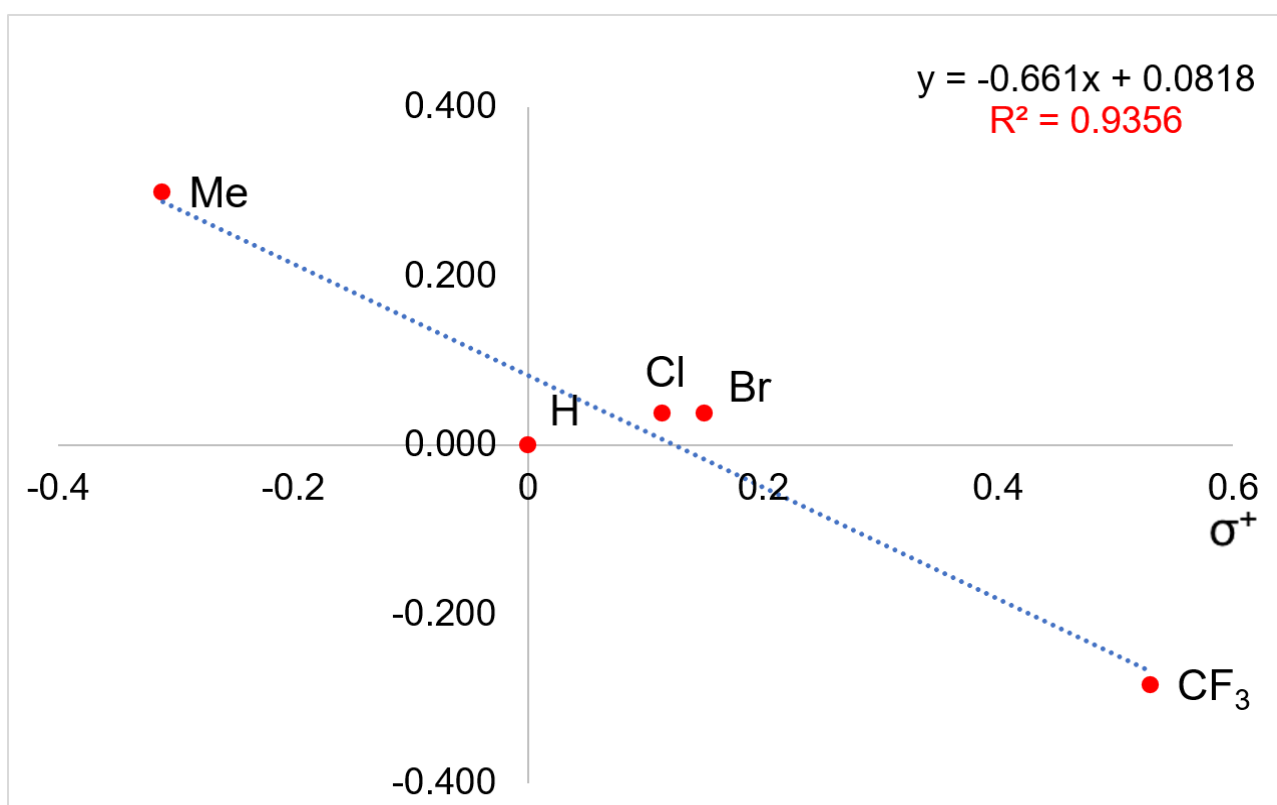

**Fig. S15** Hammett correlation for the aziridination of *para*-substituted styrenes mediated by **3d** using a single-parameter method ( $\sigma^+$ ).

**Table S3** Comparison between the DFT-calculated  $g$  values and the ones based on experimental EPR spectra.

| Complex                  | $g_x$ | $g_y$ | $g_z$ | $g_{iso}^a$ | $\Delta^b$ |
|--------------------------|-------|-------|-------|-------------|------------|
| <b>3a</b> (Simulated)    | 2.010 | 2.000 | 1.890 | 1.967       | 0.017      |
| <b>3a</b> (Experimental) | 2.010 | 2.005 | 1.880 | 1.965       |            |
| <b>3b</b> (Simulated)    | 2.010 | 1.970 | 1.870 | 1.950       | 0.000      |
| <b>3b</b> (Experimental) | 2.000 | 1.980 | 1.870 | 1.950       |            |

<sup>a</sup>  $g_{iso} = (g_x + g_y + g_z)/3$ . <sup>b</sup>  $\Delta$  = absolute difference between the  $g_{iso}$  values obtained experimentally and theoretically.

**Table S4.** Selected examples of the structural and electronic information of Ru-imido (Ru(NR)) species.

| Ru terminal imido species                                                      | CN <sup>a</sup> | M–N <sub>NR</sub> distance (Å) | M–N–R angle (°) | %SD <sub>Ru/NR</sub>                     | Ref.      |
|--------------------------------------------------------------------------------|-----------------|--------------------------------|-----------------|------------------------------------------|-----------|
| [Ru(PNP)(NPh)] <sup>+</sup>                                                    | 4               | 1.716                          | 177.5           | N/A                                      | 32        |
| [Ru <sup>II</sup> ( <i>p</i> -cymene)(NAr)] <sup>b</sup>                       | 2               | 1.751                          | 178.5           | N/A                                      | 33        |
| [Ru <sup>V</sup> ( <sup>t</sup> Bu-Cor)(NMe <sub>3</sub> )] ( <b>3a</b> )      | 5               | 1.756 <sup>c</sup>             | 146.0           | 44:40 <sup>c</sup>                       | This work |
| [Ru <sup>V</sup> ( <sup>t</sup> Bu-Cor)(NBTF)] ( <b>3d</b> )                   | 5               | 1.763 <sup>c</sup>             | 138.0           | 53:26 <sup>c</sup>                       | This work |
| [Ru <sup>V</sup> ( <sup>t</sup> Bu-Cor)(NDipp)] ( <b>3b</b> )                  | 5               | 1.779 <sup>c</sup>             | 160.0           | 35:54 <sup>c</sup><br>48:52 <sup>d</sup> | This work |
| [Ru <sup>IV</sup> (NDipp) <sub>2</sub> (PMe <sub>3</sub> ) <sub>2</sub> ]      | 4               | 1.785                          | 178.7           | N/A                                      | 18        |
| [Ru <sup>VI</sup> (TMP)(NSO <sub>2</sub> Ar) <sub>2</sub> ] <sup>e</sup>       | 6               | 1.793                          | 162.5           | N/A                                      | 34        |
| [Ru <sup>VI</sup> (TPP)(NBTF) <sub>2</sub> ] <sup>f</sup>                      | 6               | 1.806, 1.808                   | 143.7,<br>139.8 | N/A                                      | 23        |
| [Ru(PNP)(NPh)]                                                                 | 4               | 1.806                          | 162.0           | 30:68 <sup>c</sup>                       | 32        |
| [Ru <sup>II</sup> (NDipp)(PMe <sub>3</sub> ) <sub>3</sub> ]                    | 4               | 1.811                          | 174.9           | N/A                                      | 35        |
| [(SiP <sup><i>iPr</i></sup> <sub>3</sub> )Ru(NAr)] <sup>g</sup>                | 5               | 1.869                          | 172.0           | 40:54 <sup>c</sup>                       | 36        |
| [Ru <sup>IV</sup> (NTs)(SeMes) <sub>2</sub> -(PPh <sub>3</sub> )] <sup>h</sup> | 5               | 1.895                          | 96.7            | N/A                                      | 37        |

<sup>a</sup> Coordination number. <sup>b</sup> Ar = 2,4,6-(<sup>t</sup>Bu)<sub>3</sub>-C<sub>6</sub>H<sub>2</sub>. <sup>c</sup> Obtained by DFT calculations. <sup>d</sup> Obtained by CASSCF calculations. <sup>e</sup> Ar = *p*-OMe-C<sub>6</sub>H<sub>4</sub>. <sup>f</sup> Ar = 3,5-(CF<sub>3</sub>)<sub>2</sub>-C<sub>6</sub>H<sub>3</sub> (Ru=N<sub>1</sub>, Ru=N<sub>2</sub> not identical). <sup>g</sup> Ar = *p*-CF<sub>3</sub>-C<sub>6</sub>H<sub>4</sub>. <sup>h</sup>  $\kappa^2$ -NTs (as a bidentate N<sup>+</sup>O ligand).

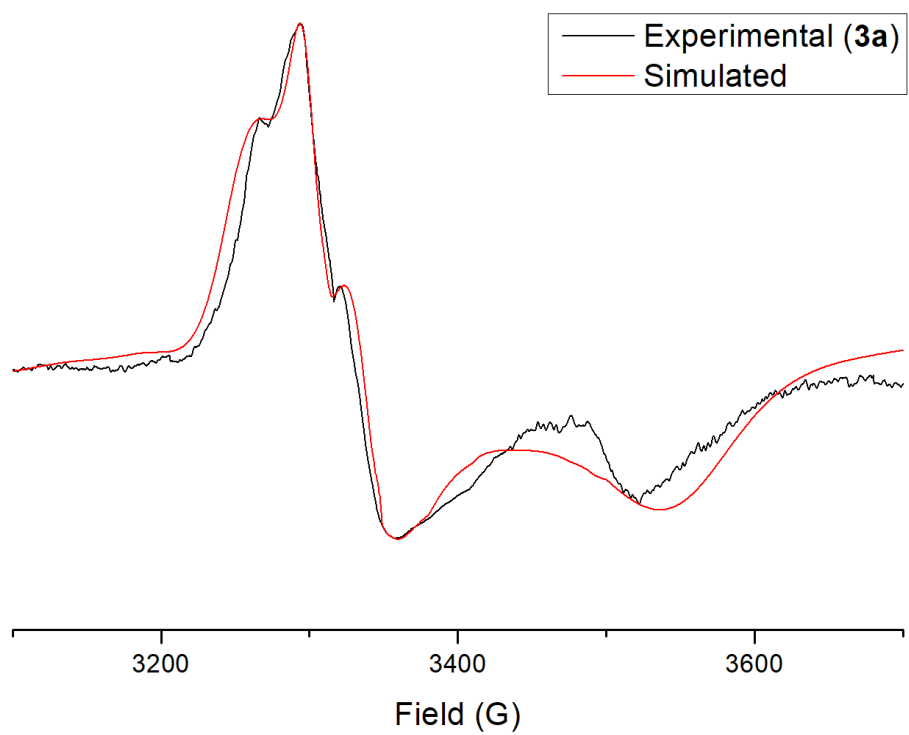

**Fig. S16** X-band EPR spectra of **3a** (experimental and simulated) recorded at 100 K.



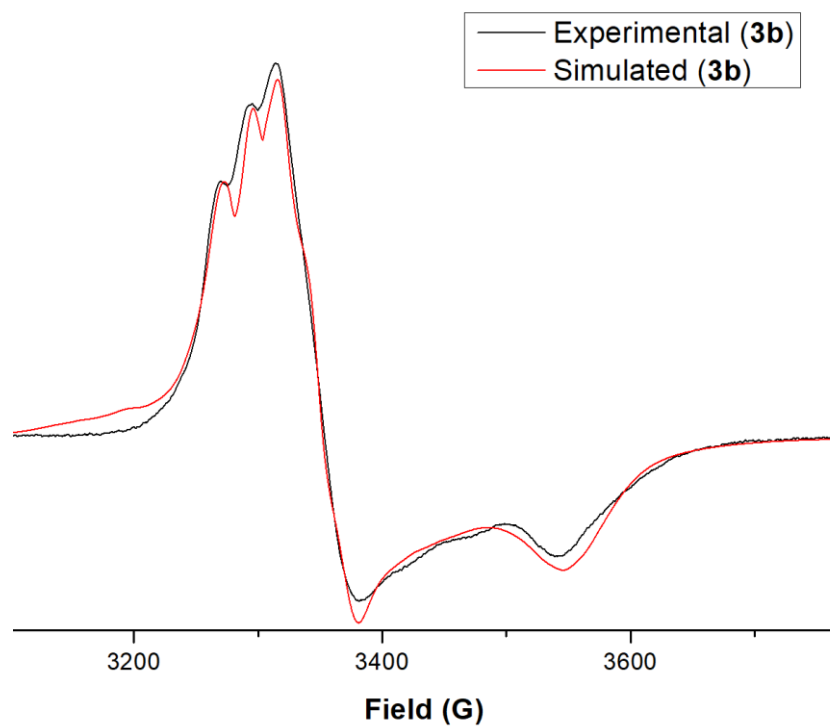

**Fig. S17** X-band EPR spectra of **3b** (experimental and simulated) recorded at 100 K.

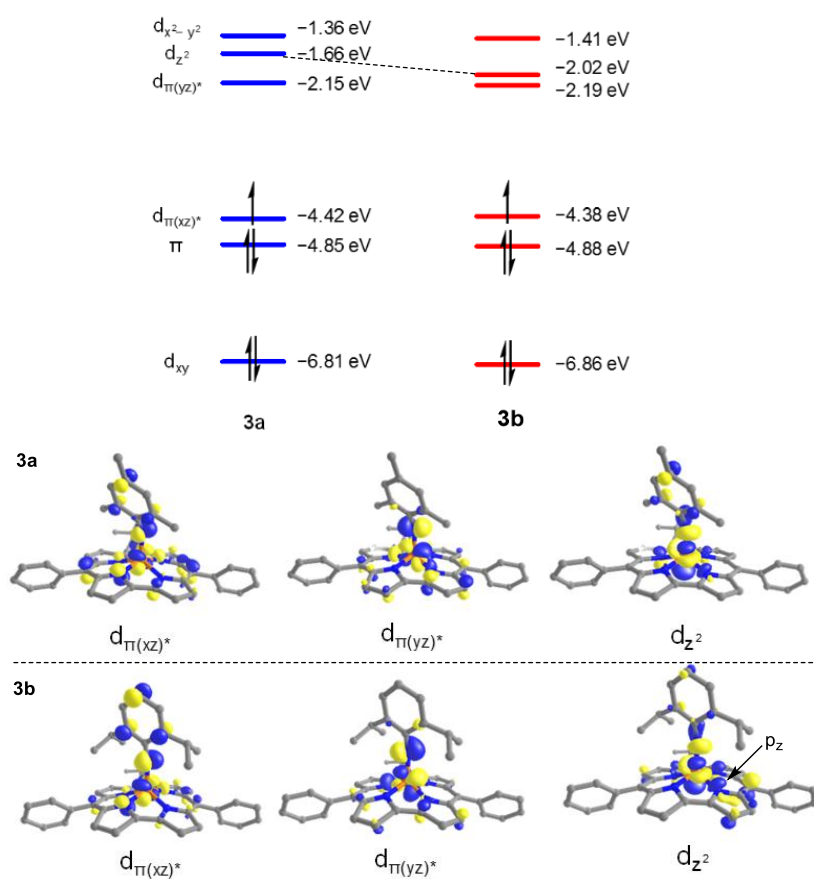

**Fig. S18** DFT-calculated molecular orbital energy diagrams of **3a** (left) and **3b** (right).

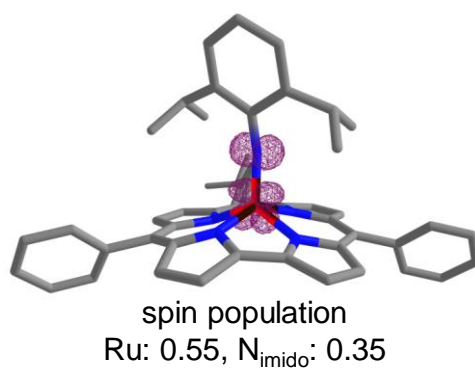

**Fig. S19** Spin density plot (contour value: 0.01) for **3b** obtained from the CASSCF calculation.

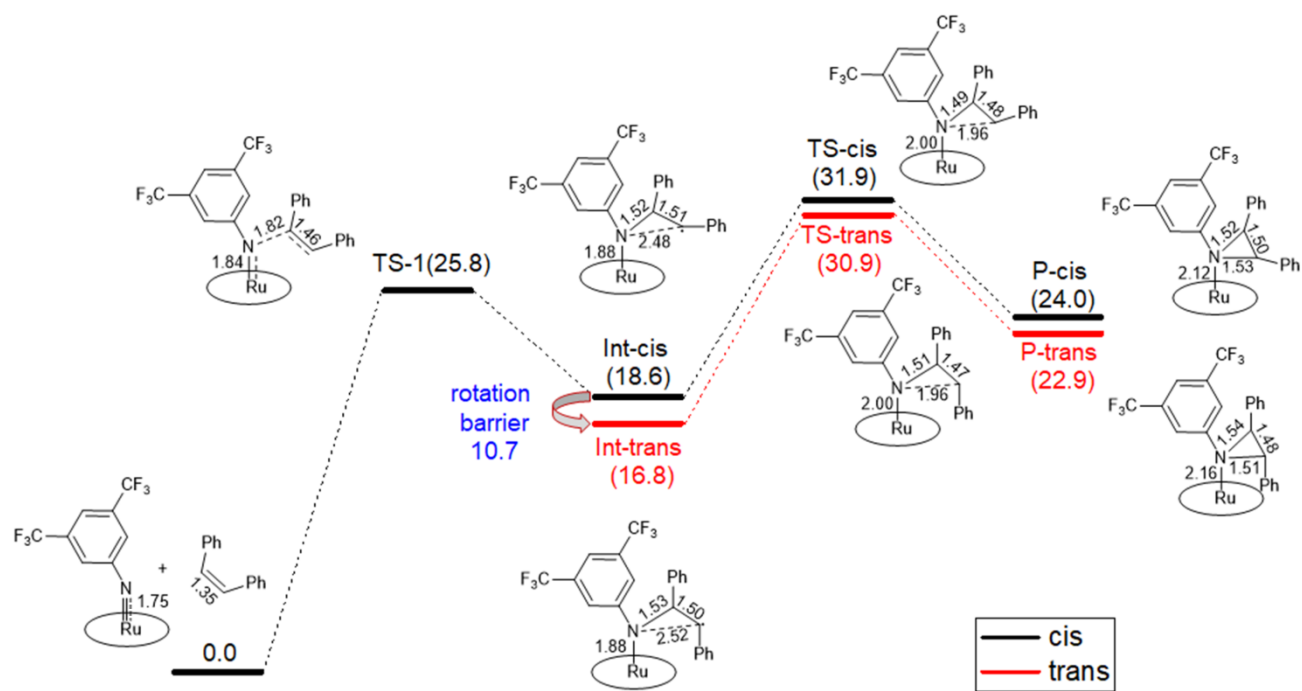

**Fig. S20** DFT-calculated reaction profile of **3d**-mediated aziridination of *cis*-stilbene.

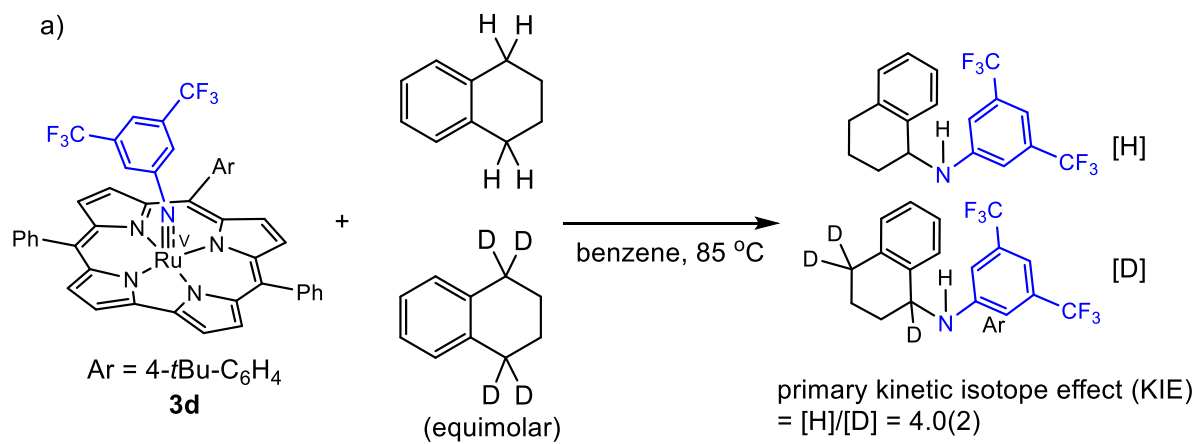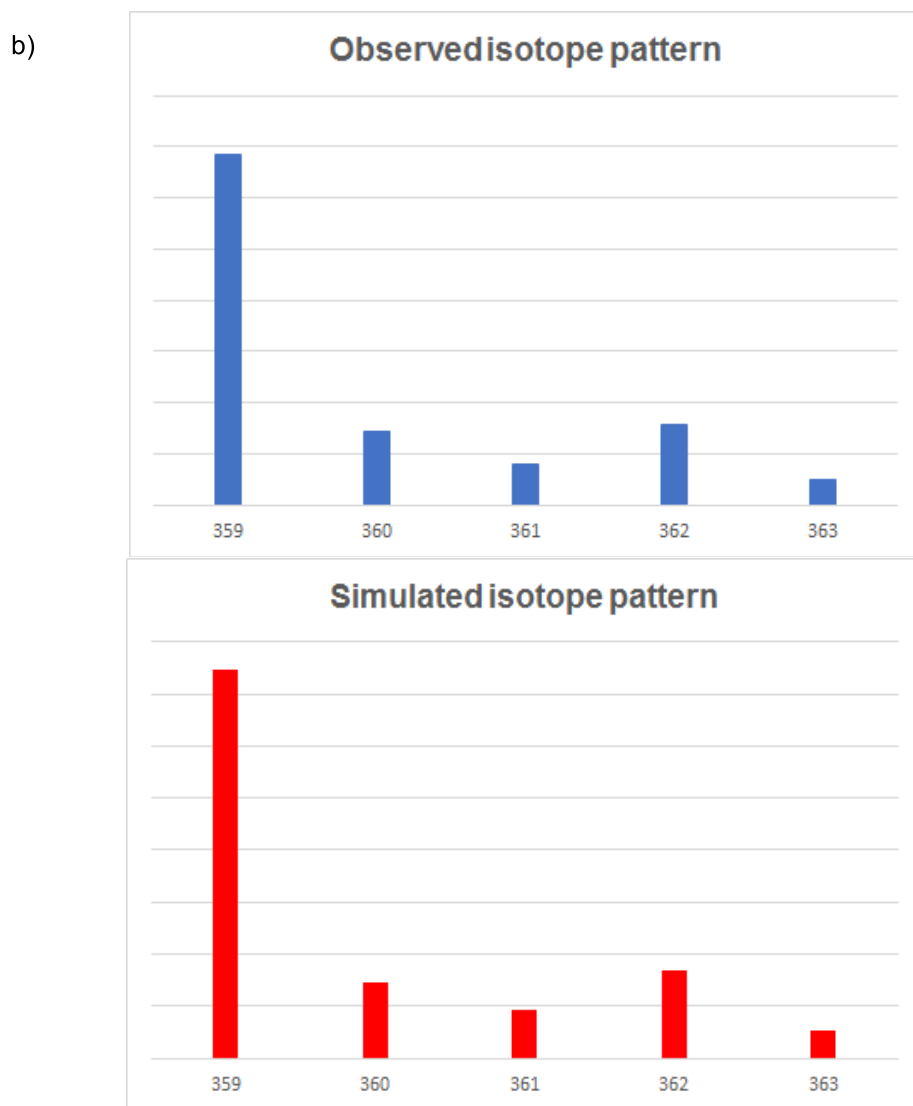

**Fig. S21** a) KIE experiment for the reaction of **3d** with tetralin. b) Isotope pattern of the aminated products by GC-MS.

# NMR spectra of the organic starting materials and products

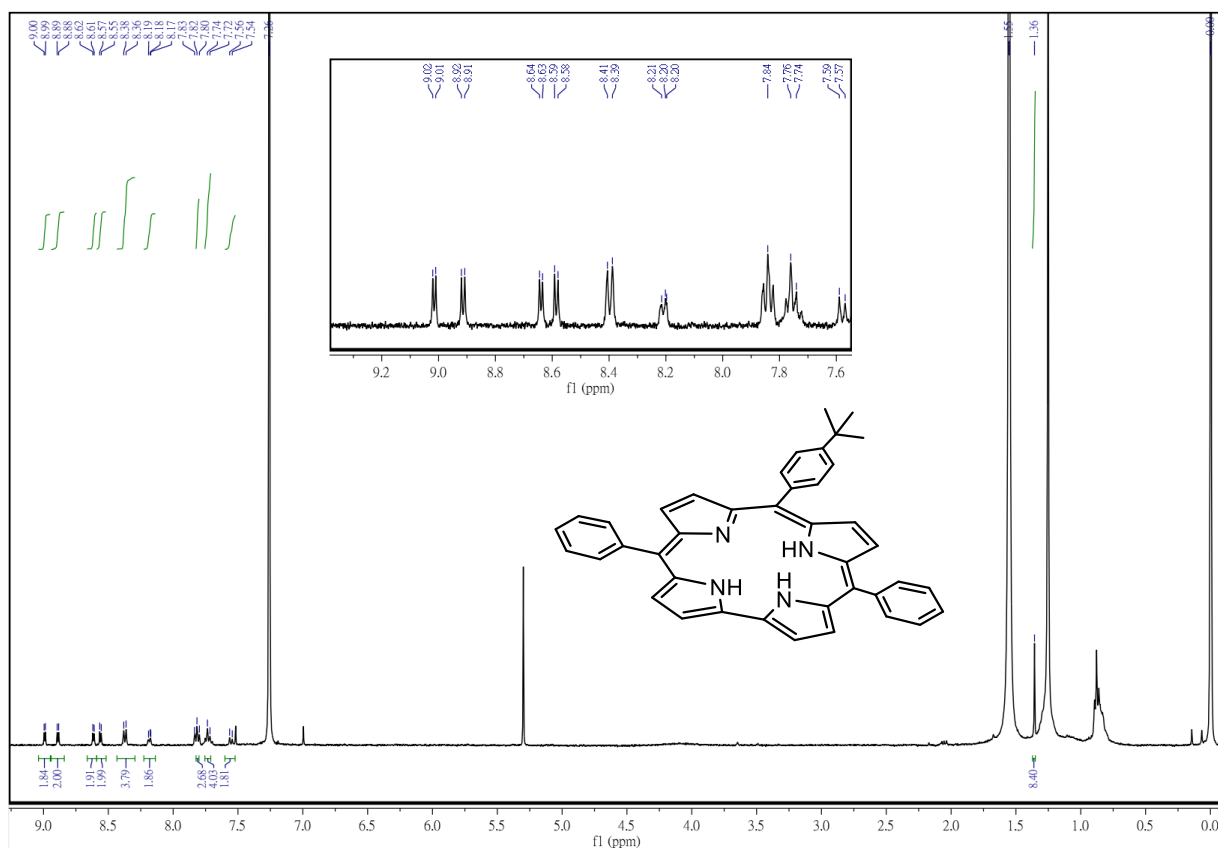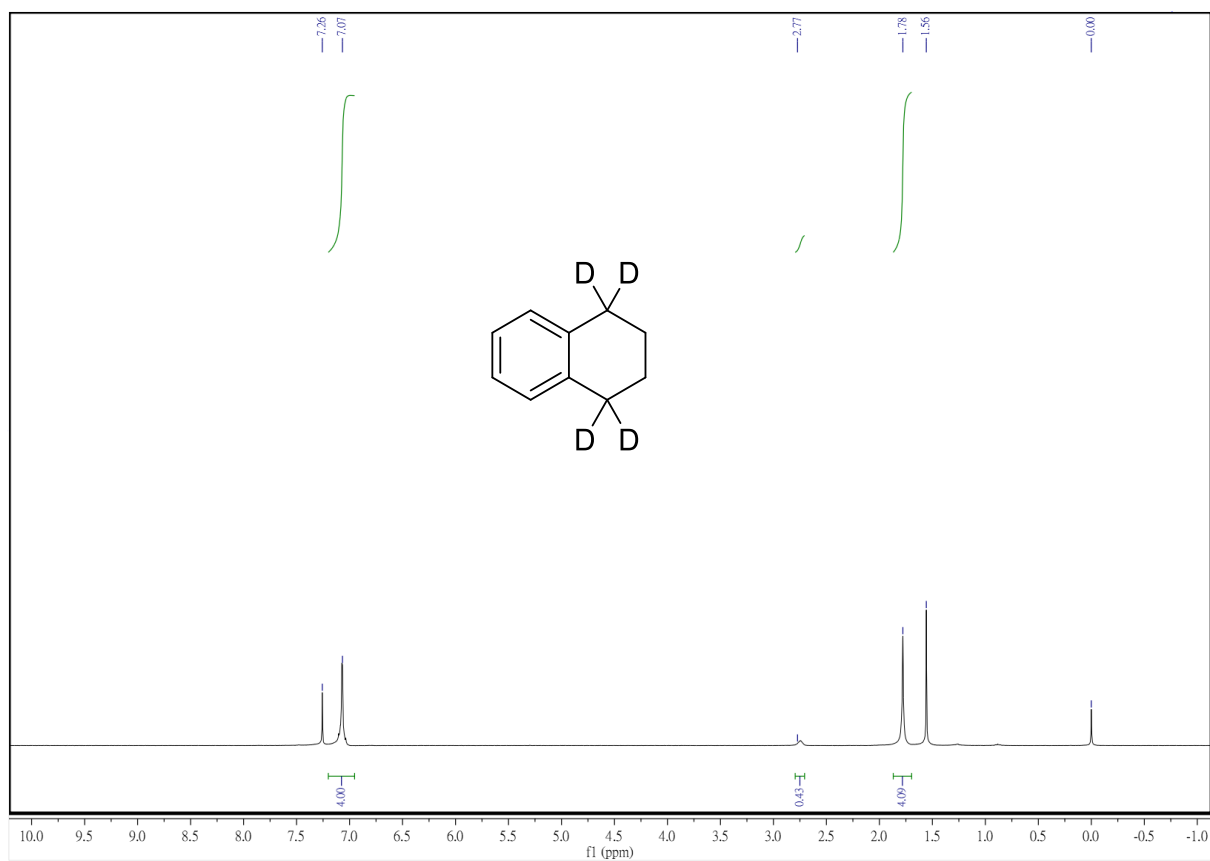

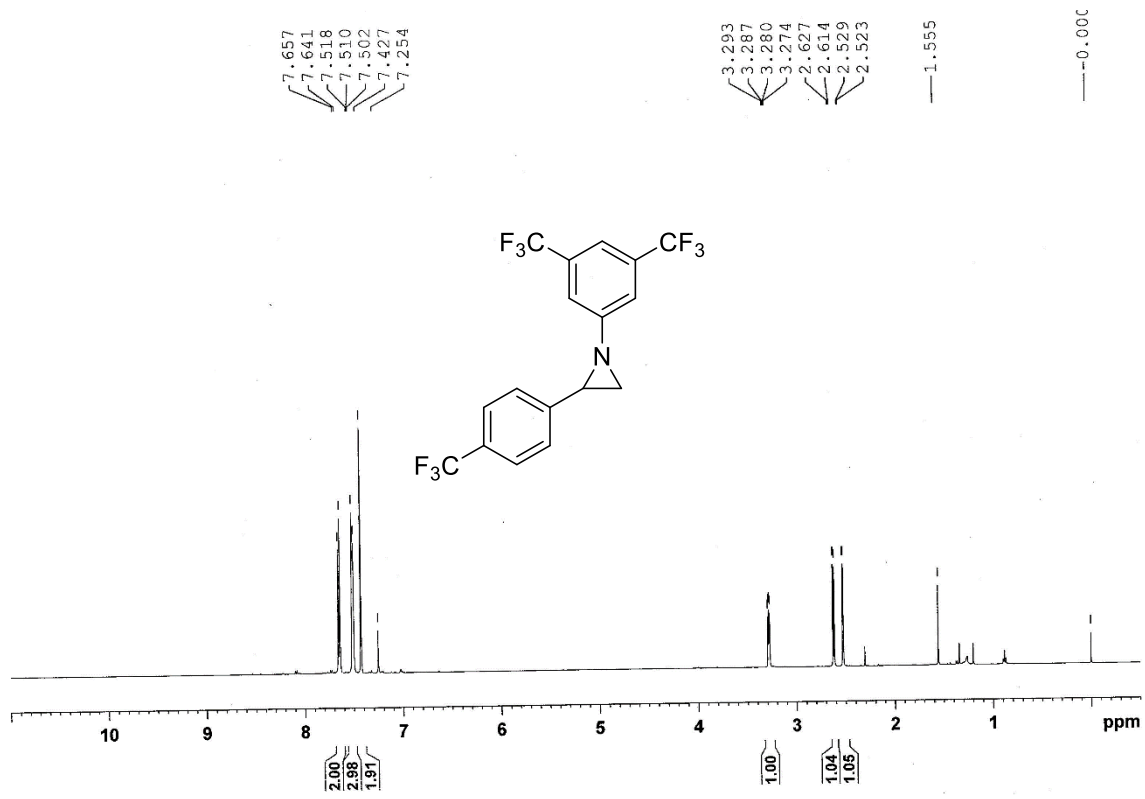

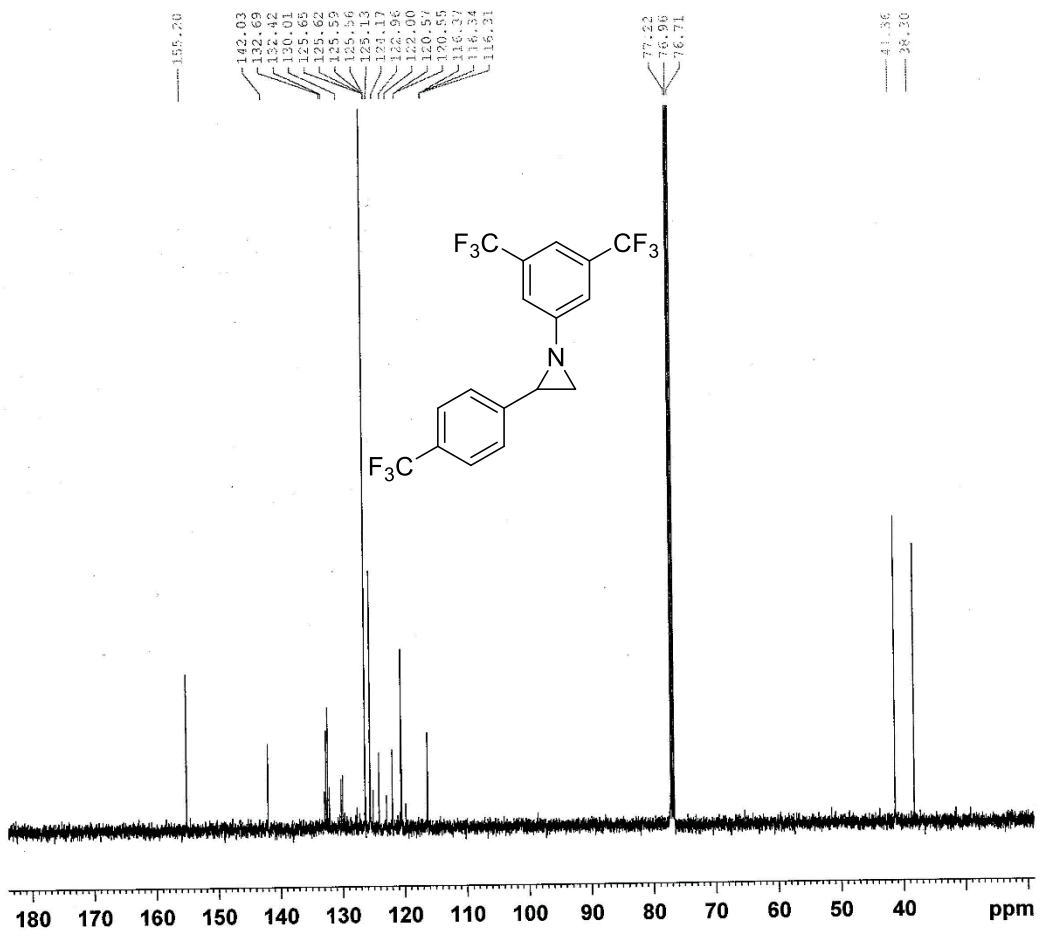



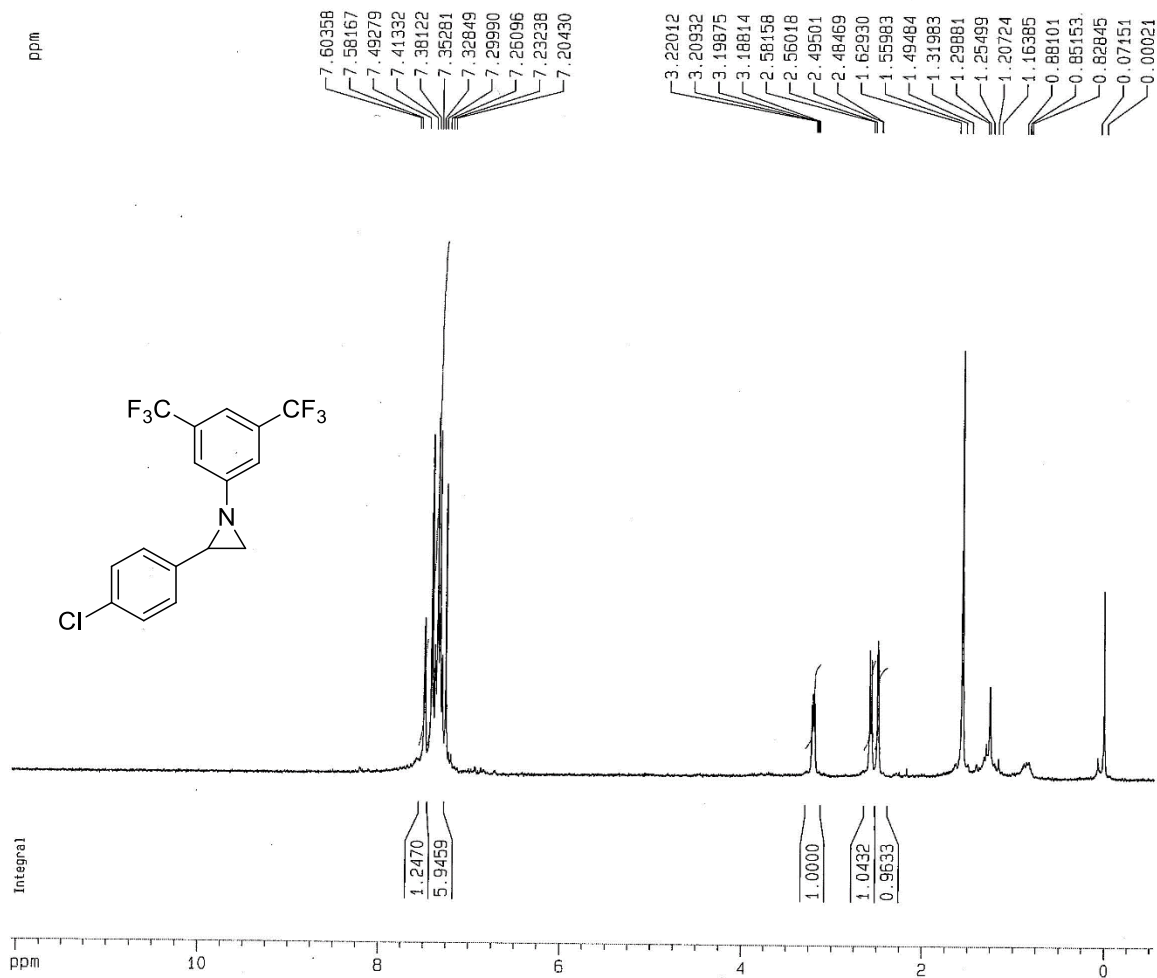

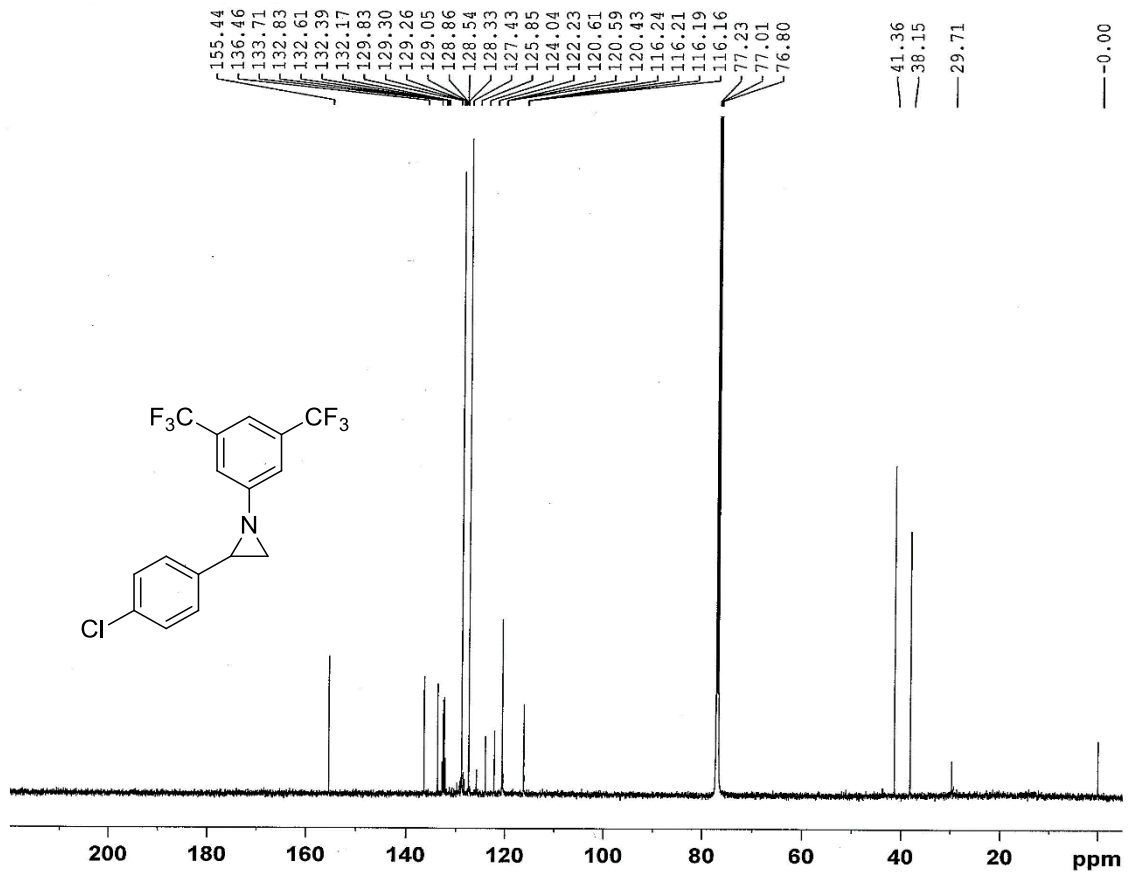

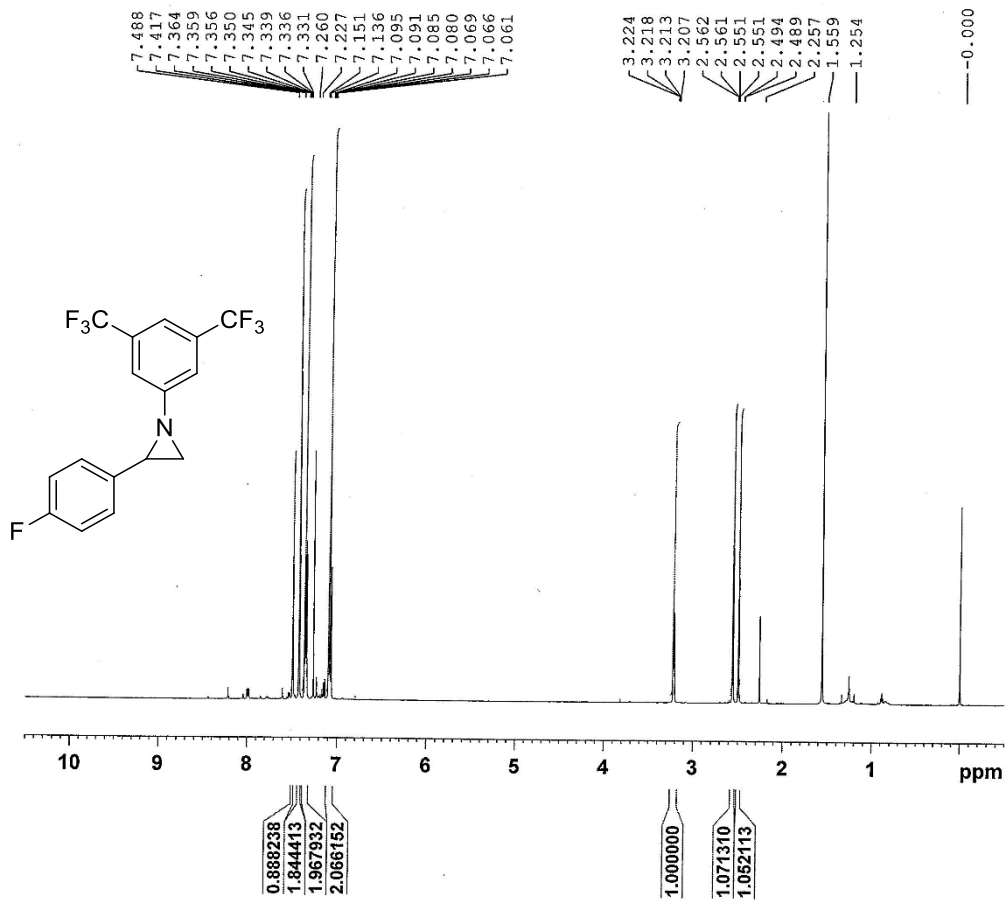

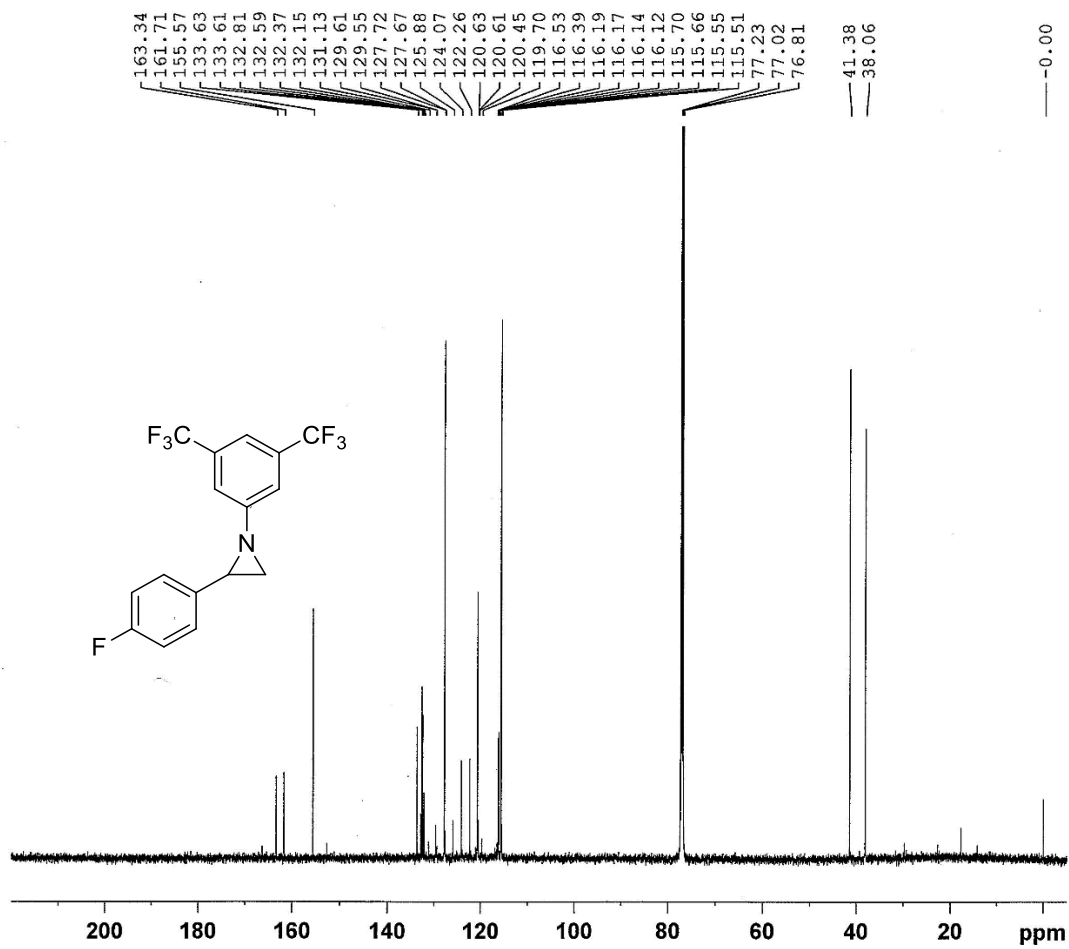

## Cartesian coordinates for DFT calculations

### 3a

|    |              |              |              |   |              |              |              |
|----|--------------|--------------|--------------|---|--------------|--------------|--------------|
| Ru | 8.427333000  | 12.043157000 | 0.050626000  | H | 14.137744000 | 18.465356000 | 2.193358000  |
| N  | 9.208513000  | 13.664192000 | -0.846081000 | C | 13.942363000 | 16.341254000 | 1.861833000  |
| N  | 8.098549000  | 11.665691000 | -1.846807000 | H | 14.983522000 | 16.127016000 | 2.088693000  |
| C  | 8.285059000  | 12.699003000 | -2.751016000 | C | 13.085730000 | 15.299863000 | 1.505507000  |
| N  | 9.969450000  | 12.139563000 | 1.325334000  | H | 13.463250000 | 14.283288000 | 1.446284000  |
| C  | 10.119586000 | 11.246628000 | 2.390321000  | N | 6.981967000  | 12.735640000 | 0.768182000  |
| C  | 7.665764000  | 9.114266000  | -0.482454000 | C | 6.176576000  | 13.845306000 | 0.869563000  |
| C  | 8.733590000  | 9.371742000  | 1.479687000  | C | 5.120085000  | 14.043073000 | -0.063081000 |
| C  | 8.965346000  | 13.809018000 | -2.190930000 | C | 6.330980000  | 14.719254000 | 1.983165000  |
| C  | 10.148777000 | 14.577992000 | -0.445534000 | C | 4.276159000  | 15.137800000 | 0.118522000  |
| N  | 8.301846000  | 10.026530000 | 0.347547000  | C | 5.455459000  | 15.794933000 | 2.105761000  |
| C  | 7.487709000  | 10.592035000 | -2.471423000 | C | 4.427340000  | 16.033606000 | 1.183535000  |
| C  | 10.418045000 | 15.428622000 | -1.575044000 | H | 3.467562000  | 15.291958000 | -0.593466000 |
| H  | 11.118157000 | 16.252406000 | -1.581634000 | H | 5.574425000  | 16.465966000 | 2.954504000  |
| C  | 10.935071000 | 11.884499000 | 3.379495000  | C | 7.406602000  | 14.472090000 | 3.008961000  |
| H  | 11.208099000 | 11.448127000 | 4.329321000  | H | 7.324425000  | 15.185960000 | 3.834393000  |
| C  | 10.812155000 | 14.453101000 | 0.793850000  | H | 7.337926000  | 13.458177000 | 3.421334000  |
| C  | 12.134032000 | 17.918699000 | 1.605808000  | H | 8.408650000  | 14.565825000 | 2.576455000  |
| H  | 11.755756000 | 18.936847000 | 1.646275000  | C | 4.903274000  | 13.081615000 | -1.202637000 |
| C  | 11.276102000 | 13.129057000 | 2.914807000  | H | 5.704059000  | 13.145963000 | -1.948045000 |
| H  | 11.876237000 | 13.868110000 | 3.425972000  | H | 4.885320000  | 12.044108000 | -0.849119000 |
| C  | 11.736415000 | 15.549518000 | 1.198440000  | H | 3.955318000  | 13.291644000 | -1.708065000 |
| C  | 9.548983000  | 9.957397000  | 2.473931000  | C | 3.516817000  | 17.228864000 | 1.330730000  |
| C  | 7.241088000  | 9.372736000  | -1.807179000 | H | 2.551829000  | 17.060916000 | 0.840912000  |
| C  | 8.292975000  | 8.004386000  | 1.399192000  | H | 3.326828000  | 17.462336000 | 2.384318000  |
| H  | 8.489826000  | 7.242434000  | 2.139593000  | H | 3.960637000  | 18.125619000 | 0.876505000  |
| C  | 7.286996000  | 10.978201000 | -3.834778000 | C | 9.867807000  | 9.124922000  | 3.672885000  |
| H  | 6.840531000  | 10.353349000 | -4.595802000 | C | 8.852505000  | 8.671274000  | 4.525295000  |
| C  | 7.629549000  | 7.852584000  | 0.209686000  | C | 11.186798000 | 8.750152000  | 3.978547000  |
| H  | 7.187686000  | 6.945658000  | -0.177516000 | C | 9.141884000  | 7.879091000  | 5.638617000  |
| C  | 7.242865000  | 7.089683000  | -2.889760000 | C | 11.468822000 | 7.959826000  | 5.089342000  |
| H  | 8.266129000  | 6.953526000  | -2.551612000 | C | 10.455371000 | 7.502091000  | 5.949918000  |
| C  | 11.276948000 | 16.877437000 | 1.248653000  | H | 7.822007000  | 8.946968000  | 4.317877000  |
| H  | 10.236780000 | 17.085355000 | 1.014471000  | H | 11.995488000 | 9.073842000  | 3.328966000  |
| C  | 9.690523000  | 14.949254000 | -2.649681000 | H | 8.318296000  | 7.560084000  | 6.267932000  |
| H  | 9.711088000  | 15.322436000 | -3.665430000 | H | 12.503617000 | 7.688770000  | 5.281202000  |
| C  | 7.777345000  | 12.266845000 | -4.003907000 | C | 10.812287000 | 6.626059000  | 7.163868000  |
| H  | 7.789867000  | 12.837515000 | -4.923510000 | C | 11.772756000 | 7.403393000  | 8.095393000  |
| C  | 10.686549000 | 13.309469000 | 1.621473000  | H | 12.045379000 | 6.788627000  | 8.962124000  |
| C  | 4.631701000  | 7.454772000  | -3.796645000 | H | 12.698477000 | 7.685166000  | 7.582687000  |
| H  | 3.612555000  | 7.602295000  | -4.144429000 | H | 11.302221000 | 8.321985000  | 8.464312000  |
| C  | 6.573378000  | 8.286769000  | -2.585844000 | C | 11.506874000 | 5.331431000  | 6.677160000  |
| C  | 5.306086000  | 6.266983000  | -4.086290000 | H | 11.773975000 | 4.696875000  | 7.531193000  |
| H  | 4.816919000  | 5.487190000  | -4.663855000 | H | 10.845432000 | 4.755553000  | 6.019737000  |
| C  | 6.614333000  | 6.088798000  | -3.631594000 | H | 12.425987000 | 5.544825000  | 6.121268000  |
| H  | 7.151145000  | 5.171896000  | -3.860667000 | C | 9.570270000  | 6.224652000  | 7.982629000  |
| C  | 5.260391000  | 8.456092000  | -3.055236000 | H | 8.857095000  | 5.645367000  | 7.385120000  |
| H  | 4.731086000  | 9.376850000  | -2.826277000 | H | 9.873100000  | 5.600703000  | 8.831065000  |
| C  | 13.469668000 | 17.654543000 | 1.915494000  | H | 9.047538000  | 7.099239000  | 8.386732000  |

### 3b

|    |             |              |              |   |              |              |              |
|----|-------------|--------------|--------------|---|--------------|--------------|--------------|
| Ru | 8.475538000 | 12.166972000 | -0.011883000 | C | 8.512093000  | 12.751416000 | -2.843379000 |
| N  | 9.361605000 | 13.756257000 | -0.926884000 | N | 10.052544000 | 12.187766000 | 1.231254000  |
| N  | 8.246864000 | 11.750436000 | -1.921308000 | C | 10.191672000 | 11.285024000 | 2.297157000  |

|   |              |              |              |   |              |              |              |
|---|--------------|--------------|--------------|---|--------------|--------------|--------------|
| C | 7.714622000  | 9.217439000  | -0.558558000 | C | 6.075601000  | 14.546120000 | 2.217151000  |
| C | 8.687077000  | 9.487538000  | 1.442503000  | C | 3.816831000  | 14.726836000 | 0.562834000  |
| C | 9.174610000  | 13.866037000 | -2.281829000 | C | 5.058425000  | 15.470424000 | 2.462587000  |
| C | 10.378082000 | 14.599497000 | -0.551841000 | C | 3.948706000  | 15.601023000 | 1.635667000  |
| N | 8.306516000  | 10.142247000 | 0.291159000  | H | 2.919404000  | 14.767964000 | -0.049650000 |
| C | 7.702471000  | 10.652546000 | -2.576634000 | H | 5.143032000  | 16.100333000 | 3.344785000  |
| C | 10.722089000 | 15.400929000 | -1.699349000 | C | 7.183389000  | 14.499309000 | 3.264789000  |
| H | 11.484328000 | 16.167299000 | -1.716099000 | H | 6.787046000  | 15.066191000 | 4.117660000  |
| C | 11.107875000 | 11.852398000 | 3.237039000  | C | 4.411548000  | 12.820303000 | -0.889695000 |
| H | 11.390040000 | 11.396566000 | 4.174679000  | H | 3.337346000  | 12.985736000 | -1.046104000 |
| C | 11.081782000 | 14.414272000 | 0.652112000  | C | 9.815012000  | 9.214289000  | 3.633224000  |
| C | 12.746787000 | 17.737945000 | 1.423521000  | C | 8.782122000  | 8.870015000  | 4.514732000  |
| H | 12.460521000 | 18.783288000 | 1.504821000  | C | 11.103110000 | 8.734716000  | 3.922210000  |
| C | 11.534300000 | 13.057129000 | 2.742394000  | C | 9.027093000  | 8.086578000  | 5.644748000  |
| H | 12.227182000 | 13.741291000 | 3.210638000  | C | 11.340544000 | 7.953543000  | 5.049904000  |
| C | 12.121695000 | 15.420098000 | 1.010457000  | C | 10.310527000 | 7.609280000  | 5.943228000  |
| C | 9.536780000  | 10.043354000 | 2.421332000  | H | 7.774524000  | 9.226186000  | 4.317868000  |
| C | 7.406816000  | 9.444956000  | -1.919162000 | H | 11.922400000 | 8.969495000  | 3.248167000  |
| C | 8.222146000  | 8.128690000  | 1.368165000  | H | 8.192802000  | 7.855467000  | 6.297774000  |
| H | 8.377054000  | 7.376219000  | 2.127940000  | H | 12.352571000 | 7.600884000  | 5.229692000  |
| C | 7.629975000  | 10.996375000 | -3.963005000 | C | 10.617609000 | 6.744894000  | 7.179231000  |
| H | 7.261695000  | 10.343516000 | -4.741941000 | C | 11.654843000 | 7.471096000  | 8.069219000  |
| C | 7.620728000  | 7.967407000  | 0.148662000  | H | 11.892412000 | 6.864574000  | 8.951935000  |
| H | 7.191059000  | 7.060313000  | -0.251341000 | H | 12.591017000 | 7.659441000  | 7.533142000  |
| C | 7.545963000  | 7.136598000  | -2.932388000 | H | 11.267403000 | 8.436559000  | 8.414365000  |
| H | 8.526364000  | 7.022039000  | -2.479097000 | C | 11.196723000 | 5.383390000  | 6.725412000  |
| C | 11.781365000 | 16.780192000 | 1.111059000  | H | 11.428059000 | 4.757882000  | 7.596319000  |
| H | 10.749322000 | 17.079721000 | 0.952969000  | H | 10.478818000 | 4.841658000  | 6.098954000  |
| C | 9.981688000  | 14.940089000 | -2.768199000 | H | 12.119080000 | 5.504680000  | 6.147834000  |
| H | 10.045833000 | 15.269405000 | -3.797134000 | C | 9.362138000  | 6.472289000  | 8.029520000  |
| C | 8.126822000  | 12.280900000 | -4.124062000 | H | 8.595034000  | 5.932590000  | 7.462393000  |
| H | 8.224900000  | 12.826021000 | -5.053834000 | H | 9.628894000  | 5.854370000  | 8.894376000  |
| C | 10.892396000 | 13.284599000 | 1.483785000  | H | 8.917725000  | 7.398912000  | 8.410381000  |
| C | 5.048285000  | 7.444664000  | -4.131949000 | C | 5.090268000  | 13.194871000 | -2.217643000 |
| H | 4.072692000  | 7.570315000  | -4.594311000 | H | 6.175763000  | 13.151447000 | -2.144429000 |
| C | 6.834961000  | 8.332479000  | -2.736232000 | H | 4.776790000  | 12.513658000 | -3.017831000 |
| C | 5.762342000  | 6.258892000  | -4.313624000 | H | 4.814458000  | 14.214110000 | -2.512568000 |
| H | 5.348224000  | 5.458432000  | -4.920812000 | C | 4.543063000  | 11.331848000 | -0.525283000 |
| C | 7.014185000  | 6.109553000  | -3.712829000 | H | 3.991644000  | 11.112205000 | 0.396652000  |
| H | 7.582781000  | 5.194575000  | -3.857067000 | H | 4.114433000  | 10.715804000 | -1.324979000 |
| C | 5.581006000  | 8.472954000  | -3.353168000 | H | 5.577431000  | 11.023029000 | -0.377507000 |
| H | 5.021015000  | 9.392564000  | -3.211641000 | C | 7.479684000  | 13.093970000 | 3.813055000  |
| C | 14.072906000 | 17.355813000 | 1.635057000  | H | 6.562432000  | 12.633062000 | 4.198814000  |
| H | 14.825314000 | 18.101573000 | 1.877240000  | H | 7.898946000  | 12.429187000 | 3.058805000  |
| C | 14.426985000 | 16.008704000 | 1.529413000  | H | 8.198403000  | 13.162214000 | 4.638145000  |
| H | 15.459069000 | 15.702878000 | 1.679806000  | C | 8.435462000  | 15.258528000 | 2.796557000  |
| C | 13.461886000 | 15.050539000 | 1.219748000  | H | 9.222356000  | 15.221694000 | 3.558988000  |
| H | 13.746011000 | 14.006795000 | 1.121601000  | H | 8.836068000  | 14.836412000 | 1.875621000  |
| N | 6.997530000  | 12.835395000 | 0.719721000  | H | 8.191398000  | 16.310297000 | 2.605221000  |
| C | 5.997375000  | 13.724768000 | 1.030585000  | H | 3.178915000  | 16.336679000 | 1.850679000  |
| C | 4.782491000  | 13.768853000 | 0.247806000  |   |              |              |              |

### 3d

|    |              |              |              |   |              |              |              |
|----|--------------|--------------|--------------|---|--------------|--------------|--------------|
| Ru | 8.367972000  | 11.997041000 | 0.135543000  | C | 7.600977000  | 9.074729000  | -0.401907000 |
| N  | 9.108590000  | 13.611969000 | -0.776962000 | C | 8.758422000  | 9.316320000  | 1.514058000  |
| N  | 7.918681000  | 11.651099000 | -1.740665000 | C | 8.792444000  | 13.784576000 | -2.106977000 |
| C  | 8.078141000  | 12.688066000 | -2.646424000 | C | 10.043932000 | 14.542171000 | -0.396147000 |
| N  | 9.959787000  | 12.092828000 | 1.353547000  | N | 8.279804000  | 9.980678000  | 0.403568000  |
| C  | 10.146538000 | 11.196015000 | 2.408008000  | C | 7.295612000  | 10.576686000 | -2.353806000 |

|   |              |              |              |   |              |              |              |
|---|--------------|--------------|--------------|---|--------------|--------------|--------------|
| C | 10.241456000 | 15.418555000 | -1.518708000 | N | 6.955993000  | 12.692255000 | 0.929602000  |
| H | 10.918181000 | 16.261417000 | -1.538001000 | C | 6.219705000  | 13.858891000 | 0.885652000  |
| C | 10.962244000 | 11.844126000 | 3.390002000  | C | 5.710621000  | 14.376247000 | -0.323719000 |
| H | 11.257827000 | 11.407148000 | 4.332713000  | C | 5.917099000  | 14.514300000 | 2.097319000  |
| C | 10.736701000 | 14.427149000 | 0.826584000  | C | 4.927610000  | 15.527587000 | -0.308429000 |
| C | 11.980306000 | 17.918410000 | 1.646720000  | C | 5.147851000  | 15.673641000 | 2.086824000  |
| H | 11.575686000 | 18.925264000 | 1.706787000  | C | 4.643498000  | 16.187986000 | 0.888959000  |
| C | 11.263824000 | 13.101671000 | 2.932095000  | C | 9.954267000  | 9.061429000  | 3.675589000  |
| H | 11.851466000 | 13.852315000 | 3.440788000  | C | 8.964353000  | 8.590359000  | 4.548269000  |
| C | 11.639020000 | 15.544217000 | 1.222390000  | C | 11.285762000 | 8.709577000  | 3.952610000  |
| C | 9.597902000  | 9.897716000  | 2.490572000  | C | 9.290881000  | 7.804827000  | 5.655878000  |
| C | 7.101664000  | 9.345490000  | -1.698466000 | C | 11.604229000 | 7.925205000  | 5.057612000  |
| C | 8.315654000  | 7.951449000  | 1.439526000  | C | 10.617219000 | 7.452214000  | 5.940443000  |
| H | 8.540905000  | 7.184349000  | 2.166289000  | H | 7.925383000  | 8.850191000  | 4.364069000  |
| C | 7.036276000  | 10.977166000 | -3.703964000 | H | 12.075157000 | 9.047289000  | 3.286631000  |
| H | 6.562034000  | 10.357507000 | -4.452133000 | H | 8.486559000  | 7.473121000  | 6.303149000  |
| C | 7.597904000  | 7.809464000  | 0.279512000  | H | 12.647267000 | 7.672953000  | 5.228573000  |
| H | 7.135708000  | 6.906738000  | -0.093208000 | C | 11.015856000 | 6.590387000  | 7.151553000  |
| C | 7.066236000  | 7.075825000  | -2.807246000 | C | 11.976955000 | 7.394318000  | 8.059653000  |
| H | 8.106684000  | 6.943631000  | -2.524364000 | H | 12.278048000 | 6.791402000  | 8.925171000  |
| C | 11.144406000 | 16.858286000 | 1.295455000  | H | 12.887111000 | 7.691340000  | 7.528028000  |
| H | 10.093931000 | 17.040282000 | 1.087184000  | H | 11.494280000 | 8.305499000  | 8.431166000  |
| C | 9.472746000  | 14.948350000 | -2.569896000 | C | 11.728590000 | 5.307996000  | 6.658923000  |
| H | 9.434363000  | 15.348504000 | -3.574616000 | H | 12.023777000 | 4.684398000  | 7.511677000  |
| C | 7.516753000  | 12.267109000 | -3.880846000 | H | 11.067790000 | 4.714383000  | 6.016809000  |
| H | 7.492015000  | 12.845990000 | -4.794830000 | H | 12.633375000 | 5.536728000  | 6.085820000  |
| C | 10.650631000 | 13.276978000 | 1.649719000  | C | 9.798589000  | 6.167620000  | 7.996453000  |
| C | 4.408131000  | 7.431633000  | -3.572548000 | H | 9.086668000  | 5.569226000  | 7.416546000  |
| H | 3.371244000  | 7.574850000  | -3.864852000 | H | 10.131545000 | 5.555701000  | 8.842278000  |
| C | 6.403630000  | 8.263258000  | -2.454444000 | H | 9.265154000  | 7.033074000  | 8.406095000  |
| C | 5.076052000  | 6.253573000  | -3.912576000 | H | 5.939937000  | 13.874723000 | -1.255931000 |
| H | 4.563554000  | 5.477358000  | -4.474404000 | H | 6.306317000  | 14.111268000 | 3.025624000  |
| C | 6.407549000  | 6.079813000  | -3.529053000 | H | 4.050262000  | 17.094227000 | 0.888258000  |
| H | 6.938397000  | 5.170419000  | -3.798129000 | C | 4.337652000  | 16.037372000 | -1.598548000 |
| C | 5.066780000  | 8.428889000  | -2.852077000 | F | 4.142862000  | 17.373472000 | -1.567749000 |
| H | 4.543081000  | 9.341928000  | -2.582799000 | F | 5.130690000  | 15.764270000 | -2.656791000 |
| C | 13.328549000 | 17.686756000 | 1.926592000  | F | 3.136302000  | 15.468705000 | -1.848808000 |
| H | 13.979984000 | 18.512413000 | 2.199954000  | C | 4.803796000  | 16.345881000 | 3.391550000  |
| C | 13.835351000 | 16.387397000 | 1.850419000  | F | 4.587912000  | 17.669387000 | 3.230800000  |
| H | 14.886026000 | 16.199262000 | 2.055074000  | F | 3.680281000  | 15.825383000 | 3.934842000  |
| C | 12.999883000 | 15.326704000 | 1.500852000  | F | 5.787547000  | 16.199541000 | 4.304596000  |
| H | 13.402720000 | 14.321001000 | 1.424611000  |   |              |              |              |
| C | 4.126479000  | 18.381586000 | 1.945556000  | H | 5.109374000  | 18.740210000 | 1.619074000  |
| H | 4.236251000  | 17.974404000 | 2.956133000  | H | 3.451791000  | 19.244235000 | 2.005046000  |

### 3d + *cis*-stilbene (in Figure S20)

|    |              |              |              |   |              |              |              |
|----|--------------|--------------|--------------|---|--------------|--------------|--------------|
| Ru | 8.090943000  | 11.661182000 | 0.393876000  | H | 10.237739000 | 16.187282000 | -1.160780000 |
| N  | 8.666557000  | 13.374697000 | -0.459553000 | C | 10.900756000 | 11.500284000 | 3.467588000  |
| N  | 7.624377000  | 11.366058000 | -1.498898000 | H | 11.298560000 | 11.028972000 | 4.354434000  |
| C  | 7.588102000  | 12.483487000 | -2.316171000 | C | 10.344029000 | 14.200332000 | 1.083545000  |
| N  | 9.715351000  | 11.803095000 | 1.538066000  | C | 11.518099000 | 17.677430000 | 2.061792000  |
| C  | 10.044445000 | 10.858381000 | 2.515794000  | H | 11.079539000 | 18.652316000 | 2.257254000  |
| C  | 7.491105000  | 8.724329000  | -0.270511000 | C | 11.097998000 | 12.794829000 | 3.061699000  |
| C  | 8.744537000  | 8.935322000  | 1.585744000  | H | 11.689417000 | 13.548369000 | 3.561708000  |
| C  | 8.250043000  | 13.602310000 | -1.751427000 | C | 11.231232000 | 15.333695000 | 1.474018000  |
| C  | 9.561776000  | 14.344644000 | -0.081226000 | C | 9.602062000  | 9.520059000  | 2.545241000  |
| N  | 8.119448000  | 9.631304000  | 0.572677000  | C | 6.897602000  | 9.030878000  | -1.521431000 |
| C  | 6.979689000  | 10.305794000 | -2.115725000 | C | 8.456192000  | 7.538697000  | 1.411317000  |
| C  | 9.620923000  | 15.299500000 | -1.152460000 | H | 8.827094000  | 6.744472000  | 2.043113000  |

|   |              |              |              |   |              |              |              |
|---|--------------|--------------|--------------|---|--------------|--------------|--------------|
| C | 6.514046000  | 10.796468000 | -3.378246000 | H | 13.466762000 | 7.231584000  | 7.113858000  |
| H | 5.959066000  | 10.216442000 | -4.102319000 | H | 12.125152000 | 7.681157000  | 8.177670000  |
| C | 7.691167000  | 7.411640000  | 0.280132000  | C | 12.393690000 | 4.832289000  | 6.179346000  |
| H | 7.339509000  | 6.493823000  | -0.169226000 | H | 12.807474000 | 4.178571000  | 6.956870000  |
| C | 6.673576000  | 7.570247000  | -3.562088000 | H | 11.717118000 | 4.234608000  | 5.557719000  |
| H | 7.528195000  | 8.084566000  | -3.991979000 | H | 13.223407000 | 5.163721000  | 5.546267000  |
| C | 10.690675000 | 16.607909000 | 1.717171000  | C | 10.540045000 | 5.463979000  | 7.735125000  |
| H | 9.617502000  | 16.755959000 | 1.655212000  | H | 9.822320000  | 4.850334000  | 7.178849000  |
| C | 8.813801000  | 14.838709000 | -2.180199000 | H | 10.988320000 | 4.828862000  | 8.507552000  |
| H | 8.678552000  | 15.295199000 | -3.152059000 | H | 9.987258000  | 6.262036000  | 8.243874000  |
| C | 6.898091000  | 12.124873000 | -3.502993000 | H | 4.192184000  | 12.780219000 | 0.703818000  |
| H | 6.707222000  | 12.775772000 | -4.346320000 | H | 7.749964000  | 14.323709000 | 2.570301000  |
| C | 10.373940000 | 13.006534000 | 1.843469000  | H | 4.161905000  | 16.704098000 | 2.486451000  |
| C | 4.506991000  | 6.219900000  | -2.441340000 | C | 2.574086000  | 14.899926000 | 1.209688000  |
| H | 3.658675000  | 5.702477000  | -2.001319000 | F | 2.195407000  | 16.192838000 | 1.118417000  |
| C | 6.227750000  | 7.934489000  | -2.279803000 | F | 2.269387000  | 14.300014000 | 0.041822000  |
| C | 4.959083000  | 5.868722000  | -3.714884000 | F | 1.790121000  | 14.328469000 | 2.159753000  |
| H | 4.469363000  | 5.072250000  | -4.268613000 | C | 6.759982000  | 16.751408000 | 3.273300000  |
| C | 6.045256000  | 6.546797000  | -4.272164000 | F | 7.358706000  | 17.561107000 | 2.359720000  |
| H | 6.410222000  | 6.274679000  | -5.259060000 | F | 5.933189000  | 17.531869000 | 3.999329000  |
| C | 5.136041000  | 7.241652000  | -1.729083000 | F | 7.732950000  | 16.305315000 | 4.093178000  |
| H | 4.769291000  | 7.519971000  | -0.745470000 | C | 3.373459000  | 9.467399000  | 3.451192000  |
| C | 12.898664000 | 17.495991000 | 2.162638000  | C | 3.168798000  | 9.843447000  | 4.732561000  |
| H | 13.541925000 | 18.330141000 | 2.429732000  | H | 4.068438000  | 8.638323000  | 3.315722000  |
| C | 13.448610000 | 16.235731000 | 1.916937000  | H | 3.661103000  | 9.221561000  | 5.480818000  |
| H | 14.523202000 | 16.086935000 | 1.983127000  | C | 2.411583000  | 10.965170000 | 5.318007000  |
| C | 12.623051000 | 15.164449000 | 1.576414000  | C | 2.235662000  | 12.204681000 | 4.675068000  |
| H | 13.055613000 | 14.189283000 | 1.371547000  | C | 1.896830000  | 10.820226000 | 6.620005000  |
| N | 6.688912000  | 12.230171000 | 1.291406000  | C | 1.547617000  | 13.242820000 | 5.298880000  |
| C | 6.055224000  | 13.423964000 | 1.580729000  | C | 1.202624000  | 11.856369000 | 7.243030000  |
| C | 4.700231000  | 13.582958000 | 1.226554000  | C | 1.022370000  | 13.073459000 | 6.583045000  |
| C | 6.713397000  | 14.454208000 | 2.282475000  | H | 2.644577000  | 12.360713000 | 3.683901000  |
| C | 4.035875000  | 14.763916000 | 1.549173000  | H | 2.041139000  | 9.877732000  | 7.143754000  |
| C | 6.025828000  | 15.622539000 | 2.599257000  | H | 1.427375000  | 14.186737000 | 4.774993000  |
| C | 4.687559000  | 15.791042000 | 2.235680000  | H | 0.808099000  | 11.714684000 | 8.245955000  |
| C | 10.116716000 | 8.635992000  | 3.633744000  | H | 0.486092000  | 13.885236000 | 7.067287000  |
| C | 9.240920000  | 8.030641000  | 4.544421000  | C | 2.809634000  | 9.969086000  | 2.183713000  |
| C | 11.488701000 | 8.369934000  | 3.775575000  | C | 3.592673000  | 9.885068000  | 1.016445000  |
| C | 9.716750000  | 7.200476000  | 5.561871000  | C | 1.497608000  | 10.463575000 | 2.063402000  |
| C | 11.956030000 | 7.538870000  | 4.789595000  | C | 3.100940000  | 10.317043000 | -0.216563000 |
| C | 11.084441000 | 6.933571000  | 5.712379000  | C | 1.005611000  | 10.894322000 | 0.832805000  |
| H | 8.174100000  | 8.220807000  | 4.462862000  | C | 1.805126000  | 10.830391000 | -0.312059000 |
| H | 12.191958000 | 8.811812000  | 3.074968000  | H | 4.605792000  | 9.495462000  | 1.083496000  |
| H | 8.996948000  | 6.764930000  | 6.246088000  | H | 0.860949000  | 10.505527000 | 2.940774000  |
| H | 13.025092000 | 7.355880000  | 4.855151000  | H | 3.730315000  | 10.247704000 | -1.099907000 |
| C | 11.645875000 | 6.025574000  | 6.821357000  | H | -0.009798000 | 11.275933000 | 0.766109000  |
| C | 12.630703000 | 6.834577000  | 7.699094000  | H | 1.418566000  | 11.168332000 | -1.269579000 |
| H | 13.048804000 | 6.197809000  | 8.488371000  |   |              |              |              |

**TS-1 (in Figure S20)**

|    |             |              |              |   |              |              |              |
|----|-------------|--------------|--------------|---|--------------|--------------|--------------|
| Ru | 8.265586000 | 11.838092000 | 0.057904000  | C | 9.758086000  | 14.568460000 | -0.175921000 |
| N  | 8.879842000 | 13.641927000 | -0.660452000 | N | 8.187583000  | 9.797930000  | 0.247724000  |
| N  | 8.061084000 | 11.597343000 | -1.859054000 | C | 7.507397000  | 10.540703000 | -2.579918000 |
| C  | 8.107100000 | 12.740445000 | -2.655547000 | C | 10.010964000 | 15.518018000 | -1.235716000 |
| N  | 9.723242000 | 11.957147000 | 1.375166000  | H | 10.666442000 | 16.374736000 | -1.163498000 |
| C  | 9.907337000 | 10.994287000 | 2.385233000  | C | 10.606274000 | 11.629808000 | 3.458649000  |
| C  | 7.727145000 | 8.909640000  | -0.709934000 | H | 10.864011000 | 11.153494000 | 4.393476000  |
| C  | 8.724636000 | 9.076086000  | 1.288988000  | C | 10.401940000 | 14.376092000 | 1.064557000  |
| C  | 8.669319000 | 13.863033000 | -1.992204000 | C | 11.590042000 | 17.804075000 | 2.190577000  |



|   |              |              |              |   |              |              |              |
|---|--------------|--------------|--------------|---|--------------|--------------|--------------|
| H | 11.174897000 | 18.800204000 | 2.319186000  | H | 12.623841000 | 7.532701000  | 5.046409000  |
| C | 10.856931000 | 12.931456000 | 3.101417000  | C | 11.042918000 | 6.045765000  | 6.728229000  |
| H | 11.359783000 | 13.679258000 | 3.698052000  | C | 11.867029000 | 6.836338000  | 7.772412000  |
| C | 11.276235000 | 15.469418000 | 1.576412000  | H | 12.197403000 | 6.171302000  | 8.579783000  |
| C | 9.465255000  | 9.653731000  | 2.347423000  | H | 12.759760000 | 7.290663000  | 7.329906000  |
| C | 7.331785000  | 9.254656000  | -2.027259000 | H | 11.268681000 | 7.639773000  | 8.217236000  |
| C | 8.519026000  | 7.673679000  | 1.024896000  | C | 11.916939000 | 4.913091000  | 6.137761000  |
| H | 8.855403000  | 6.865007000  | 1.657821000  | H | 12.246003000 | 4.231348000  | 6.931746000  |
| C | 7.201054000  | 11.058929000 | -3.875357000 | H | 11.355565000 | 4.329341000  | 5.399283000  |
| H | 6.737137000  | 10.496323000 | -4.673590000 | H | 12.811449000 | 5.305269000  | 5.642650000  |
| C | 7.909189000  | 7.573871000  | -0.196414000 | C | 9.845430000  | 5.400683000  | 7.451570000  |
| H | 7.662560000  | 6.667246000  | -0.730799000 | H | 9.235017000  | 4.795195000  | 6.771761000  |
| C | 7.375915000  | 7.847616000  | -4.121213000 | H | 10.207606000 | 4.738727000  | 8.246338000  |
| H | 8.279523000  | 8.368027000  | -4.425073000 | H | 9.197206000  | 6.151936000  | 7.917015000  |
| C | 10.769241000 | 16.770336000 | 1.737834000  | H | 4.853352000  | 13.402543000 | -0.840838000 |
| H | 9.723491000  | 16.966002000 | 1.526312000  | H | 7.429675000  | 14.316825000 | 2.470151000  |
| C | 9.339405000  | 15.077066000 | -2.357381000 | H | 4.835896000  | 17.352429000 | 0.858011000  |
| H | 9.360621000  | 15.519592000 | -3.344938000 | C | 3.657505000  | 15.810779000 | -1.057718000 |
| C | 7.579534000  | 12.396760000 | -3.922192000 | F | 3.591080000  | 17.147881000 | -1.231959000 |
| H | 7.479488000  | 13.064555000 | -4.768126000 | F | 3.849107000  | 15.248826000 | -2.270834000 |
| C | 10.323100000 | 13.162348000 | 1.794753000  | F | 2.438897000  | 15.406052000 | -0.627318000 |
| C | 5.080689000  | 6.480657000  | -3.322287000 | C | 6.722479000  | 16.948221000 | 2.736074000  |
| H | 4.183004000  | 5.954853000  | -3.007486000 | F | 7.506009000  | 17.861998000 | 2.104282000  |
| C | 6.769598000  | 8.182601000  | -2.898247000 | F | 5.727344000  | 17.646127000 | 3.326668000  |
| C | 5.691915000  | 6.159053000  | -4.536039000 | F | 7.468414000  | 16.392165000 | 3.709483000  |
| H | 5.276385000  | 5.378614000  | -5.167881000 | C | 5.665384000  | 11.210138000 | 1.793161000  |
| C | 6.842038000  | 6.845371000  | -4.931661000 | C | 5.722301000  | 11.680412000 | 3.173306000  |
| H | 7.330574000  | 6.595282000  | -5.869813000 | H | 6.344076000  | 10.371773000 | 1.661881000  |
| C | 5.614716000  | 7.481557000  | -2.509984000 | H | 6.579276000  | 11.301550000 | 3.726785000  |
| H | 5.129481000  | 7.739233000  | -1.572965000 | C | 4.930820000  | 12.636901000 | 3.879967000  |
| C | 12.932846000 | 17.560243000 | 2.484699000  | C | 3.851002000  | 13.383065000 | 3.326238000  |
| H | 13.571320000 | 18.366413000 | 2.836199000  | C | 5.250335000  | 12.879224000 | 5.247846000  |
| C | 13.451087000 | 16.273143000 | 2.322733000  | C | 3.145335000  | 14.296849000 | 4.096855000  |
| H | 14.497897000 | 16.075329000 | 2.538421000  | C | 4.536782000  | 13.791538000 | 6.010588000  |
| C | 12.631520000 | 15.238467000 | 1.872903000  | C | 3.475911000  | 14.507847000 | 5.441809000  |
| H | 13.042700000 | 14.243164000 | 1.731230000  | H | 3.582381000  | 13.247729000 | 2.286045000  |
| N | 6.669889000  | 12.365479000 | 0.816426000  | H | 6.075321000  | 12.329418000 | 5.694422000  |
| C | 6.185349000  | 13.699707000 | 0.824646000  | H | 2.330734000  | 14.856603000 | 3.645240000  |
| C | 5.218740000  | 14.105947000 | -0.103484000 | H | 4.806529000  | 13.952274000 | 7.050873000  |
| C | 6.671460000  | 14.626611000 | 1.761645000  | H | 2.918534000  | 15.225949000 | 6.036381000  |
| C | 4.739340000  | 15.418523000 | -0.086412000 | C | 4.363589000  | 10.926373000 | 1.081570000  |
| C | 6.185014000  | 15.930719000 | 1.766336000  | C | 4.325797000  | 10.787772000 | -0.315814000 |
| C | 5.211903000  | 16.335931000 | 0.848081000  | C | 3.201071000  | 10.625056000 | 1.808798000  |
| C | 9.862498000  | 8.753022000  | 3.470435000  | C | 3.154935000  | 10.399306000 | -0.966861000 |
| C | 8.896832000  | 8.069748000  | 4.222047000  | C | 2.030532000  | 10.230162000 | 1.157732000  |
| C | 11.211188000 | 8.535314000  | 3.799913000  | C | 1.999322000  | 10.122815000 | -0.232571000 |
| C | 9.260109000  | 7.211652000  | 5.262217000  | H | 5.220584000  | 10.982955000 | -0.895936000 |
| C | 11.567506000 | 7.676576000  | 4.835654000  | H | 3.212484000  | 10.689383000 | 2.891378000  |
| C | 10.603273000 | 6.991554000  | 5.596396000  | H | 3.151442000  | 10.306551000 | -2.049502000 |
| H | 7.844438000  | 8.213599000  | 3.991751000  | H | 1.143428000  | 10.004872000 | 1.743709000  |
| H | 11.985763000 | 9.035885000  | 3.225658000  | H | 1.086960000  | 9.820196000  | -0.739223000 |
| H | 8.470936000  | 6.713993000  | 5.815076000  |   |              |              |              |

### Int-cis (in Figure S20)

|    |             |              |              |   |             |              |              |
|----|-------------|--------------|--------------|---|-------------|--------------|--------------|
| Ru | 8.271449000 | 11.876142000 | 0.087250000  | C | 9.946466000 | 10.992918000 | 2.367297000  |
| N  | 8.886717000 | 13.688792000 | -0.624958000 | C | 7.704248000 | 8.954623000  | -0.704936000 |
| N  | 8.023795000 | 11.658633000 | -1.819905000 | C | 8.725640000 | 9.095650000  | 1.280098000  |
| C  | 8.070500000 | 12.808932000 | -2.611205000 | C | 8.654759000 | 13.920306000 | -1.950403000 |
| N  | 9.759675000 | 11.966415000 | 1.364101000  | C | 9.794230000 | 14.594658000 | -0.157116000 |

|   |              |              |              |   |              |              |              |
|---|--------------|--------------|--------------|---|--------------|--------------|--------------|
| N | 8.182425000  | 9.831286000  | 0.253681000  | C | 10.638702000 | 6.963130000  | 5.546446000  |
| C | 7.467748000  | 10.607239000 | -2.549938000 | H | 7.873001000  | 8.230296000  | 3.989068000  |
| C | 10.042778000 | 15.546009000 | -1.217603000 | H | 12.013241000 | 9.006448000  | 3.170261000  |
| H | 10.715433000 | 16.390010000 | -1.154550000 | H | 8.506358000  | 6.710383000  | 5.793364000  |
| C | 10.665139000 | 11.613930000 | 3.434708000  | H | 12.658011000 | 7.483461000  | 4.972341000  |
| H | 10.925442000 | 11.129604000 | 4.364684000  | C | 11.082103000 | 6.003969000  | 6.665482000  |
| C | 10.464938000 | 14.381259000 | 1.064738000  | C | 11.928466000 | 6.777575000  | 7.704610000  |
| C | 11.752982000 | 17.777470000 | 2.177631000  | H | 12.262049000 | 6.102853000  | 8.502542000  |
| H | 11.364514000 | 18.783303000 | 2.313749000  | H | 12.820247000 | 7.225455000  | 7.253681000  |
| C | 10.927810000 | 12.914856000 | 3.082250000  | H | 11.344942000 | 7.584081000  | 8.163352000  |
| H | 11.445445000 | 13.653048000 | 3.678207000  | C | 11.935659000 | 4.866112000  | 6.055370000  |
| C | 11.372276000 | 15.452357000 | 1.564827000  | H | 12.266625000 | 4.174410000  | 6.839843000  |
| C | 9.487453000  | 9.658753000  | 2.330846000  | H | 11.358483000 | 4.294621000  | 5.319493000  |
| C | 7.296685000  | 9.314804000  | -2.012512000 | H | 12.828448000 | 5.252025000  | 5.552317000  |
| C | 8.509199000  | 7.695946000  | 1.006537000  | C | 9.886761000  | 5.366870000  | 7.399302000  |
| H | 8.849755000  | 6.880155000  | 1.627942000  | H | 9.260761000  | 4.773799000  | 6.722704000  |
| C | 7.151971000  | 11.138777000 | -3.836420000 | H | 10.251520000 | 4.694526000  | 8.184082000  |
| H | 6.679220000  | 10.584130000 | -4.635030000 | H | 9.253162000  | 6.121609000  | 7.879000000  |
| C | 7.885475000  | 7.611687000  | -0.207699000 | H | 5.004673000  | 13.486876000 | -0.902510000 |
| H | 7.627036000  | 6.712415000  | -0.748772000 | H | 7.407089000  | 14.404553000 | 2.532539000  |
| C | 7.328401000  | 7.930470000  | -4.121624000 | H | 5.098399000  | 17.499838000 | 0.630947000  |
| H | 8.231451000  | 8.452573000  | -4.424402000 | C | 3.970360000  | 15.942781000 | -1.301584000 |
| C | 10.900142000 | 16.765226000 | 1.735629000  | F | 3.995792000  | 17.272298000 | -1.533408000 |
| H | 9.856814000  | 16.987602000 | 1.539205000  | F | 4.214761000  | 15.318272000 | -2.474544000 |
| C | 9.338946000  | 15.124438000 | -2.325629000 | F | 2.702657000  | 15.625664000 | -0.947268000 |
| H | 9.346727000  | 15.570660000 | -3.311681000 | C | 6.827368000  | 17.076414000 | 2.650199000  |
| C | 7.531448000  | 12.477012000 | -3.874663000 | F | 7.663312000  | 17.949498000 | 2.027603000  |
| H | 7.425176000  | 13.152484000 | -4.713648000 | F | 5.830277000  | 17.819050000 | 3.178469000  |
| C | 10.380901000 | 13.161958000 | 1.785299000  | F | 7.515169000  | 16.526937000 | 3.669401000  |
| C | 5.034613000  | 6.559338000  | -3.325955000 | C | 5.838351000  | 11.474045000 | 1.768901000  |
| H | 4.137487000  | 6.031763000  | -3.012530000 | C | 5.747736000  | 12.009165000 | 3.177612000  |
| C | 6.728019000  | 8.253644000  | -2.892660000 | H | 6.472061000  | 10.587788000 | 1.837055000  |
| C | 5.639910000  | 6.248861000  | -4.545552000 | H | 6.589847000  | 11.718089000 | 3.802580000  |
| H | 5.220254000  | 5.475441000  | -5.183280000 | C | 4.813623000  | 12.892654000 | 3.781417000  |
| C | 6.789353000  | 6.937191000  | -4.939660000 | C | 3.693385000  | 13.478382000 | 3.120141000  |
| H | 7.273209000  | 6.695759000  | -5.882489000 | C | 5.003092000  | 13.232306000 | 5.155568000  |
| C | 5.573687000  | 7.551112000  | -2.505723000 | C | 2.834439000  | 14.335132000 | 3.793695000  |
| H | 5.093040000  | 7.800874000  | -1.564322000 | C | 4.136703000  | 14.086921000 | 5.818701000  |
| C | 13.093593000 | 17.500084000 | 2.451401000  | C | 3.042531000  | 14.645972000 | 5.144243000  |
| H | 13.756851000 | 18.289557000 | 2.794758000  | H | 3.512835000  | 13.257915000 | 2.075406000  |
| C | 13.577480000 | 16.200995000 | 2.279318000  | H | 5.851572000  | 12.804613000 | 5.684417000  |
| H | 14.622256000 | 15.977045000 | 2.478627000  | H | 1.992233000  | 14.769972000 | 3.262004000  |
| C | 12.726060000 | 15.187803000 | 1.840236000  | H | 4.310582000  | 14.325331000 | 6.864634000  |
| H | 13.110855000 | 14.183181000 | 1.690571000  | H | 2.364566000  | 15.318105000 | 5.662374000  |
| N | 6.668445000  | 12.414781000 | 0.911752000  | C | 4.539058000  | 10.995537000 | 1.105066000  |
| C | 6.235367000  | 13.781803000 | 0.837849000  | C | 4.416615000  | 10.916420000 | -0.288386000 |
| C | 5.360734000  | 14.197947000 | -0.168840000 | C | 3.500553000  | 10.473752000 | 1.891823000  |
| C | 6.712749000  | 14.720947000 | 1.764411000  | C | 3.275636000  | 10.368595000 | -0.880067000 |
| C | 4.956332000  | 15.535039000 | -0.239056000 | C | 2.363121000  | 9.920007000  | 1.302702000  |
| C | 6.300997000  | 16.047954000 | 1.686177000  | C | 2.240940000  | 9.871706000  | -0.087030000 |
| C | 5.415443000  | 16.464893000 | 0.687873000  | H | 5.223840000  | 11.265821000 | -0.921421000 |
| C | 9.890223000  | 8.747660000  | 3.443243000  | H | 3.579309000  | 10.502980000 | 2.973762000  |
| C | 8.926515000  | 8.071471000  | 4.203575000  | H | 3.205465000  | 10.325028000 | -1.963610000 |
| C | 11.240640000 | 8.511630000  | 3.752118000  | H | 1.570544000  | 9.528284000  | 1.934910000  |
| C | 9.293766000  | 7.202031000  | 5.232739000  | H | 1.352364000  | 9.446671000  | -0.545878000 |
| C | 11.600733000 | 7.641558000  | 4.777076000  |   |              |              |              |

**Int-trans (in Figure S20)**

|    |             |              |             |   |             |              |              |
|----|-------------|--------------|-------------|---|-------------|--------------|--------------|
| Ru | 8.184073000 | 11.854683000 | 0.205991000 | N | 8.808285000 | 13.656546000 | -0.515733000 |
|----|-------------|--------------|-------------|---|-------------|--------------|--------------|

|   |              |              |              |   |              |              |              |
|---|--------------|--------------|--------------|---|--------------|--------------|--------------|
| N | 7.83970000   | 11.665261000 | -1.684703000 | C | 9.939720000  | 8.651796000  | 3.437269000  |
| C | 7.926120000  | 12.805731000 | -2.485595000 | C | 9.011565000  | 8.013821000  | 4.271558000  |
| N | 9.733451000  | 11.907370000 | 1.422593000  | C | 11.299152000 | 8.358777000  | 3.638528000  |
| C | 9.981976000  | 10.909059000 | 2.383917000  | C | 9.422655000  | 7.125180000  | 5.267808000  |
| C | 7.563181000  | 8.945253000  | -0.600132000 | C | 11.702524000 | 7.471003000  | 4.631874000  |
| C | 8.652072000  | 9.052929000  | 1.353097000  | C | 10.776918000 | 6.829401000  | 5.474122000  |
| C | 8.545328000  | 13.901200000 | -1.833724000 | H | 7.952065000  | 8.219305000  | 4.145022000  |
| C | 9.723024000  | 14.557251000 | -0.057695000 | H | 12.043549000 | 8.823866000  | 2.998206000  |
| N | 8.098456000  | 9.807260000  | 0.344240000  | H | 8.661901000  | 6.664478000  | 5.888261000  |
| C | 7.273676000  | 10.621126000 | -2.411681000 | H | 12.764478000 | 7.269584000  | 4.743420000  |
| C | 9.947012000  | 15.521624000 | -1.113395000 | C | 11.266805000 | 5.851693000  | 6.557089000  |
| H | 10.617236000 | 16.367924000 | -1.053587000 | C | 12.204049000 | 6.596723000  | 7.537744000  |
| C | 10.780117000 | 11.496209000 | 3.413514000  | H | 12.572817000 | 5.909866000  | 8.309487000  |
| H | 11.105561000 | 10.984655000 | 4.307694000  | H | 13.074653000 | 7.021176000  | 7.026714000  |
| C | 10.427684000 | 14.326601000 | 1.141234000  | H | 11.676565000 | 7.417170000  | 8.037933000  |
| C | 11.639439000 | 17.714601000 | 2.350602000  | C | 12.043369000 | 4.691557000  | 5.889037000  |
| H | 11.218352000 | 18.694731000 | 2.558429000  | H | 12.402190000 | 3.985869000  | 6.648249000  |
| C | 11.017905000 | 12.807487000 | 3.083458000  | H | 11.402030000 | 4.142288000  | 5.190307000  |
| H | 11.577432000 | 13.527789000 | 3.663066000  | H | 12.913938000 | 5.051854000  | 5.331117000  |
| C | 11.323292000 | 15.407551000 | 1.642564000  | C | 10.105538000 | 5.246739000  | 7.368890000  |
| C | 9.490627000  | 9.585029000  | 2.359857000  | H | 9.416939000  | 4.676886000  | 6.734446000  |
| C | 7.116411000  | 9.324810000  | -1.886153000 | H | 10.502500000 | 4.559611000  | 8.124639000  |
| C | 8.355958000  | 7.663650000  | 1.100592000  | H | 9.529180000  | 6.017199000  | 7.893754000  |
| H | 8.672135000  | 6.836432000  | 1.719866000  | H | 5.348081000  | 13.419814000 | -1.096016000 |
| C | 6.998239000  | 11.142020000 | -3.712685000 | H | 6.947792000  | 14.509540000 | 2.734476000  |
| H | 6.547686000  | 10.579331000 | -4.518591000 | H | 5.048260000  | 17.488184000 | 0.274051000  |
| C | 7.683199000  | 7.600997000  | -0.090054000 | C | 4.399849000  | 15.837112000 | -1.809558000 |
| H | 7.345266000  | 6.711419000  | -0.602594000 | F | 4.234058000  | 17.167541000 | -1.961709000 |
| C | 7.320116000  | 7.247056000  | -3.308481000 | F | 5.064448000  | 15.381583000 | -2.894362000 |
| H | 8.373586000  | 7.199252000  | -3.047198000 | F | 3.169026000  | 15.273204000 | -1.843893000 |
| C | 10.805974000 | 16.687720000 | 1.905169000  | C | 6.357490000  | 17.163450000 | 2.620842000  |
| H | 9.743209000  | 16.869610000 | 1.779434000  | F | 7.487190000  | 17.834373000 | 2.275401000  |
| C | 9.222378000  | 15.109790000 | -2.211070000 | F | 5.378056000  | 18.089328000 | 2.716906000  |
| H | 9.208688000  | 15.566289000 | -3.192279000 | F | 6.563020000  | 16.654482000 | 3.851916000  |
| C | 7.396951000  | 12.473234000 | -3.755206000 | C | 5.726464000  | 11.568502000 | 1.918955000  |
| H | 7.324771000  | 13.141178000 | -4.603601000 | C | 5.259592000  | 12.277009000 | 3.157906000  |
| C | 10.383396000 | 13.090244000 | 1.834755000  | H | 6.379057000  | 10.740222000 | 2.192211000  |
| C | 4.624315000  | 7.389829000  | -4.006745000 | H | 4.350335000  | 12.865063000 | 3.068499000  |
| H | 3.572539000  | 7.450048000  | -4.274447000 | C | 5.861402000  | 12.224918000 | 4.440431000  |
| C | 6.530481000  | 8.285215000  | -2.788532000 | C | 7.067566000  | 11.520403000 | 4.720629000  |
| C | 5.418088000  | 6.359141000  | -4.513754000 | C | 5.238081000  | 12.907575000 | 5.527684000  |
| H | 4.988795000  | 5.615409000  | -5.179827000 | C | 7.599884000  | 11.496859000 | 6.002301000  |
| C | 6.767906000  | 6.291185000  | -4.162530000 | C | 5.779012000  | 12.877873000 | 6.803069000  |
| H | 7.395307000  | 5.497123000  | -4.559000000 | C | 6.963763000  | 12.170189000 | 7.053350000  |
| C | 5.175628000  | 8.346221000  | -3.152088000 | H | 7.588927000  | 11.002566000 | 3.923512000  |
| H | 4.554280000  | 9.141427000  | -2.750571000 | H | 4.318235000  | 13.456339000 | 5.340460000  |
| C | 13.004094000 | 17.484151000 | 2.535002000  | H | 8.520201000  | 10.948646000 | 6.184065000  |
| H | 13.652406000 | 18.285063000 | 2.880431000  | H | 5.280950000  | 13.406231000 | 7.611749000  |
| C | 13.531680000 | 16.217860000 | 2.271241000  | H | 7.386411000  | 12.147429000 | 8.053764000  |
| H | 14.594606000 | 16.031701000 | 2.401568000  | C | 4.538770000  | 10.986773000 | 1.154699000  |
| C | 12.699562000 | 15.189488000 | 1.829579000  | C | 4.496531000  | 9.607937000  | 0.906961000  |
| H | 13.115956000 | 14.210513000 | 1.609953000  | C | 3.459168000  | 11.776339000 | 0.726584000  |
| N | 6.608649000  | 12.454028000 | 1.039611000  | C | 3.412467000  | 9.032347000  | 0.241315000  |
| C | 6.174872000  | 13.805951000 | 0.849438000  | C | 2.380360000  | 11.204566000 | 0.051763000  |
| C | 5.526763000  | 14.169924000 | -0.334207000 | C | 2.352464000  | 9.829634000  | -0.193321000 |
| C | 6.425331000  | 14.782304000 | 1.825804000  | H | 5.319558000  | 8.978597000  | 1.233209000  |
| C | 5.123333000  | 15.493590000 | -0.534773000 | H | 3.451491000  | 12.844543000 | 0.918989000  |
| C | 6.021294000  | 16.098816000 | 1.611778000  | H | 3.401121000  | 7.960945000  | 0.060780000  |
| C | 5.362928000  | 16.464027000 | 0.433576000  | H | 1.557614000  | 11.834626000 | -0.275589000 |

H 1.507622000 9.383830000 -0.711515000

**TS-rotation (in Figure S20)**

|    |              |              |              |   |              |              |              |
|----|--------------|--------------|--------------|---|--------------|--------------|--------------|
| Ru | 8.281551000  | 12.128791000 | 0.055514000  | C | 5.014353000  | 14.557431000 | 0.757782000  |
| N  | 9.054543000  | 13.861328000 | -0.752194000 | C | 7.272925000  | 15.124077000 | 1.372208000  |
| N  | 7.971682000  | 11.864641000 | -1.832960000 | C | 4.659293000  | 15.904513000 | 0.831504000  |
| C  | 8.082266000  | 12.978871000 | -2.669156000 | C | 6.903112000  | 16.466759000 | 1.453944000  |
| N  | 9.826203000  | 12.118579000 | 1.265102000  | C | 5.598667000  | 16.873399000 | 1.174697000  |
| C  | 9.924621000  | 11.192306000 | 2.327770000  | C | 9.646058000  | 9.031961000  | 3.536797000  |
| C  | 7.564415000  | 9.199514000  | -0.659699000 | C | 8.619922000  | 8.509426000  | 4.335132000  |
| C  | 8.531480000  | 9.366226000  | 1.345934000  | C | 10.964962000 | 8.667981000  | 3.856780000  |
| C  | 8.787816000  | 14.055354000 | -2.078046000 | C | 8.897712000  | 7.667583000  | 5.413995000  |
| C  | 10.133457000 | 14.631834000 | -0.403969000 | C | 11.235429000 | 7.825393000  | 4.931192000  |
| N  | 8.054467000  | 10.090926000 | 0.280306000  | C | 10.211011000 | 7.302908000  | 5.740521000  |
| C  | 7.391218000  | 10.808600000 | -2.540667000 | H | 7.588589000  | 8.770925000  | 4.113970000  |
| C  | 10.453609000 | 15.476070000 | -1.532794000 | H | 11.782742000 | 9.039957000  | 3.245919000  |
| H  | 11.253815000 | 16.202017000 | -1.561157000 | H | 8.065542000  | 7.299170000  | 6.003667000  |
| C  | 10.741484000 | 11.784864000 | 3.337647000  | H | 12.270498000 | 7.564777000  | 5.134986000  |
| H  | 10.957931000 | 11.334175000 | 4.295236000  | C | 10.555903000 | 6.372326000  | 6.916574000  |
| C  | 10.860019000 | 14.379537000 | 0.776723000  | C | 11.478332000 | 7.118315000  | 7.910289000  |
| C  | 12.922003000 | 17.506850000 | 1.445513000  | H | 11.738022000 | 6.465734000  | 8.752887000  |
| H  | 12.774425000 | 18.583232000 | 1.475849000  | H | 12.412548000 | 7.439049000  | 7.437363000  |
| C  | 11.166809000 | 13.010065000 | 2.887875000  | H | 10.982781000 | 8.010012000  | 8.311007000  |
| H  | 11.796507000 | 13.710665000 | 3.417644000  | C | 11.287497000 | 5.117729000  | 6.381820000  |
| C  | 11.998857000 | 15.276848000 | 1.122534000  | H | 11.545598000 | 4.444975000  | 7.208947000  |
| C  | 9.332605000  | 9.915042000  | 2.374124000  | H | 10.654049000 | 4.564305000  | 5.679101000  |
| C  | 7.201648000  | 9.528491000  | -1.987026000 | H | 12.215907000 | 5.376752000  | 5.862008000  |
| C  | 8.248002000  | 7.970348000  | 1.123848000  | C | 9.302758000  | 5.906579000  | 7.682451000  |
| H  | 8.528129000  | 7.165286000  | 1.787979000  | H | 8.615928000  | 5.345104000  | 7.038774000  |
| C  | 7.102892000  | 11.310668000 | -3.844022000 | H | 9.597691000  | 5.245605000  | 8.505196000  |
| H  | 6.614080000  | 10.747590000 | -4.626730000 | H | 8.752879000  | 6.749141000  | 8.117391000  |
| C  | 7.668458000  | 7.869374000  | -0.110075000 | H | 4.250056000  | 13.833286000 | 0.514843000  |
| H  | 7.386692000  | 6.963443000  | -0.627342000 | H | 8.280676000  | 14.823415000 | 1.624849000  |
| C  | 7.373706000  | 8.137410000  | -4.078617000 | H | 5.318769000  | 17.917672000 | 1.238465000  |
| H  | 8.267480000  | 8.694779000  | -4.343226000 | C | 3.221996000  | 16.294552000 | 0.603229000  |
| C  | 11.840499000 | 16.673412000 | 1.157885000  | F | 3.107782000  | 17.580967000 | 0.207578000  |
| H  | 10.864722000 | 17.105051000 | 0.971112000  | F | 2.640567000  | 15.523243000 | -0.342343000 |
| C  | 9.619022000  | 15.117349000 | -2.566981000 | F | 2.484671000  | 16.158779000 | 1.728073000  |
| H  | 9.629631000  | 15.500877000 | -3.579026000 | C | 7.937545000  | 17.498487000 | 1.811652000  |
| C  | 7.531895000  | 12.631239000 | -3.922217000 | F | 8.622742000  | 17.913958000 | 0.715182000  |
| H  | 7.460217000  | 13.282991000 | -4.783367000 | F | 7.386624000  | 18.599757000 | 2.364681000  |
| C  | 10.618829000 | 13.241475000 | 1.589532000  | F | 8.850385000  | 17.017817000 | 2.683386000  |
| C  | 5.108054000  | 6.673348000  | -3.381346000 | C | 5.810708000  | 11.813691000 | 1.668043000  |
| H  | 4.220834000  | 6.108822000  | -3.105816000 | C | 5.302688000  | 12.483004000 | 2.937976000  |
| C  | 6.702546000  | 8.443441000  | -2.881519000 | H | 6.440540000  | 10.981948000 | 2.009526000  |
| C  | 5.781745000  | 6.381792000  | -4.569109000 | H | 5.933537000  | 13.318659000 | 3.226403000  |
| H  | 5.426132000  | 5.587189000  | -5.219628000 | C | 4.190829000  | 12.297643000 | 3.807189000  |
| C  | 6.917711000  | 7.117231000  | -4.913633000 | C | 3.034119000  | 11.495290000 | 3.582436000  |
| H  | 7.456328000  | 6.891961000  | -5.830413000 | C | 4.228016000  | 13.024755000 | 5.039827000  |
| C  | 5.563940000  | 7.692626000  | -2.544536000 | C | 2.018165000  | 11.419019000 | 4.527180000  |
| H  | 5.030579000  | 7.925271000  | -1.628951000 | C | 3.211721000  | 12.936414000 | 5.976256000  |
| C  | 14.183177000 | 16.965623000 | 1.700575000  | C | 2.093917000  | 12.126753000 | 5.731955000  |
| H  | 15.023907000 | 17.616827000 | 1.924489000  | H | 2.922416000  | 10.956198000 | 2.653094000  |
| C  | 14.357063000 | 15.580281000 | 1.661624000  | H | 5.090545000  | 13.655287000 | 5.242182000  |
| H  | 15.337151000 | 15.147538000 | 1.844836000  | H | 1.147264000  | 10.803181000 | 4.316659000  |
| C  | 13.277784000 | 14.745926000 | 1.374732000  | H | 3.283985000  | 13.501328000 | 6.902046000  |
| H  | 13.424440000 | 13.671065000 | 1.325088000  | H | 1.293558000  | 12.057481000 | 6.463116000  |
| N  | 6.722544000  | 12.768695000 | 0.945435000  | C | 4.804154000  | 11.089705000 | 0.751974000  |
| C  | 6.337523000  | 14.148894000 | 0.997637000  | C | 4.382687000  | 11.565174000 | -0.495166000 |

|   |             |              |              |   |             |              |              |
|---|-------------|--------------|--------------|---|-------------|--------------|--------------|
| C | 4.334947000 | 9.832837000  | 1.167954000  | H | 4.699148000 | 9.409081000  | 2.100768000  |
| C | 3.447705000 | 10.855960000 | -1.255685000 | H | 3.132533000 | 11.253057000 | -2.216599000 |
| C | 3.397845000 | 9.124687000  | 0.416840000  | H | 3.037788000 | 8.163462000  | 0.774583000  |
| C | 2.933139000 | 9.645814000  | -0.794013000 | H | 2.201221000 | 9.099813000  | -1.382765000 |
| H | 4.804376000 | 12.475179000 | -0.905234000 |   |             |              |              |

**TS-cis (in Figure S20)**

|    |              |              |              |   |              |              |              |
|----|--------------|--------------|--------------|---|--------------|--------------|--------------|
| Ru | 8.457106000  | 11.961873000 | 0.124213000  | C | 12.512242000 | 15.280365000 | 2.662589000  |
| N  | 9.124311000  | 13.741105000 | -0.411840000 | H | 12.981816000 | 14.309440000 | 2.535357000  |
| N  | 7.958745000  | 11.985053000 | -1.787026000 | N | 6.740924000  | 12.474121000 | 1.020403000  |
| C  | 8.245756000  | 13.139333000 | -2.500441000 | C | 5.982232000  | 13.540375000 | 0.435606000  |
| N  | 9.704363000  | 11.980699000 | 1.693492000  | C | 4.857886000  | 13.299882000 | -0.360963000 |
| C  | 9.859040000  | 10.928191000 | 2.578818000  | C | 6.440790000  | 14.857407000 | 0.585919000  |
| C  | 7.788080000  | 9.183561000  | -0.891110000 | C | 4.203753000  | 14.366201000 | -0.985627000 |
| C  | 8.746270000  | 9.144542000  | 1.167338000  | C | 5.782014000  | 15.910177000 | -0.039891000 |
| C  | 8.908061000  | 14.128178000 | -1.724018000 | C | 4.653239000  | 15.675024000 | -0.828538000 |
| C  | 9.940773000  | 14.631144000 | 0.229592000  | C | 9.712825000  | 8.578371000  | 3.387341000  |
| N  | 8.349013000  | 9.961702000  | 0.122037000  | C | 8.694620000  | 7.879560000  | 4.049302000  |
| C  | 7.540799000  | 10.990046000 | -2.626807000 | C | 11.038422000 | 8.273423000  | 3.739812000  |
| C  | 10.216020000 | 15.687959000 | -0.719858000 | C | 8.985428000  | 6.920841000  | 5.022899000  |
| H  | 10.834244000 | 16.554610000 | -0.529835000 | C | 11.323098000 | 7.316755000  | 4.710137000  |
| C  | 10.525999000 | 11.445985000 | 3.744738000  | C | 10.305656000 | 6.614119000  | 5.379416000  |
| H  | 10.779416000 | 10.874762000 | 4.626847000  | H | 7.657179000  | 8.089264000  | 3.801576000  |
| C  | 10.434206000 | 14.376286000 | 1.536181000  | H | 11.852233000 | 8.787816000  | 3.236119000  |
| C  | 11.335847000 | 17.792098000 | 2.935126000  | H | 8.157040000  | 6.414495000  | 5.506365000  |
| H  | 10.870277000 | 18.768968000 | 3.038093000  | H | 12.364718000 | 7.110560000  | 4.941591000  |
| C  | 10.787454000 | 12.779079000 | 3.524559000  | C | 10.666309000 | 5.561241000  | 6.443259000  |
| H  | 11.291786000 | 13.454559000 | 4.201465000  | C | 11.478939000 | 6.230441000  | 7.577377000  |
| C  | 11.200073000 | 15.473527000 | 2.194829000  | H | 11.752595000 | 5.489783000  | 8.338919000  |
| C  | 9.407399000  | 9.600625000  | 2.339088000  | H | 12.404020000 | 6.682114000  | 7.204181000  |
| C  | 7.387199000  | 9.651852000  | -2.175268000 | H | 10.894843000 | 7.019545000  | 8.064846000  |
| C  | 8.382355000  | 7.794502000  | 0.820976000  | C | 11.519300000 | 4.445431000  | 5.793157000  |
| H  | 8.568881000  | 6.921378000  | 1.430230000  | H | 11.792988000 | 3.689851000  | 6.539952000  |
| C  | 7.488592000  | 11.567437000 | -3.951628000 | H | 10.964817000 | 3.945309000  | 4.990807000  |
| H  | 7.194427000  | 11.043313000 | -4.850726000 | H | 12.445656000 | 4.839626000  | 5.362382000  |
| C  | 7.788171000  | 7.822154000  | -0.416148000 | C | 9.418605000  | 4.908929000  | 7.068089000  |
| H  | 7.408759000  | 6.972015000  | -0.965144000 | H | 8.811926000  | 4.388337000  | 6.318461000  |
| C  | 7.605485000  | 7.548219000  | -3.569081000 | H | 9.724954000  | 4.169402000  | 7.816705000  |
| H  | 8.596241000  | 7.394638000  | -3.151514000 | H | 8.782698000  | 5.645776000  | 7.572028000  |
| C  | 10.626566000 | 16.750746000 | 2.335681000  | H | 4.505629000  | 12.291447000 | -0.522690000 |
| H  | 9.615831000  | 16.922899000 | 1.976246000  | H | 7.319748000  | 15.044361000 | 1.187676000  |
| C  | 9.582835000  | 15.375875000 | -1.910048000 | H | 4.140736000  | 16.495450000 | -1.316868000 |
| H  | 9.621683000  | 15.947364000 | -2.828368000 | C | 2.963679000  | 14.087551000 | -1.793674000 |
| C  | 7.919919000  | 12.880033000 | -3.868589000 | F | 2.750957000  | 15.031858000 | -2.734032000 |
| H  | 8.036938000  | 13.572424000 | -4.692446000 | F | 3.032347000  | 12.892691000 | -2.420638000 |
| C  | 10.297725000 | 13.127745000 | 2.215283000  | F | 1.859563000  | 14.055147000 | -1.009795000 |
| C  | 5.086598000  | 7.967256000  | -4.688221000 | C | 6.328903000  | 17.308467000 | 0.080777000  |
| H  | 4.103719000  | 8.137390000  | -5.120196000 | F | 7.156346000  | 17.612413000 | -0.941209000 |
| C  | 6.856824000  | 8.667502000  | -3.165399000 | F | 5.339906000  | 18.230717000 | 0.074606000  |
| C  | 5.837804000  | 6.854435000  | -5.071409000 | F | 7.032305000  | 17.478988000 | 1.225072000  |
| H  | 5.445457000  | 6.154930000  | -5.804774000 | C | 6.158564000  | 11.560538000 | 2.047894000  |
| C  | 7.100214000  | 6.650454000  | -4.509976000 | C | 6.644950000  | 12.605283000 | 2.970508000  |
| H  | 7.699151000  | 5.795141000  | -4.812129000 | H | 6.840410000  | 10.711678000 | 2.097639000  |
| C  | 5.592313000  | 8.864844000  | -3.747092000 | H | 7.670373000  | 12.446469000 | 3.284531000  |
| H  | 5.004047000  | 9.729489000  | -3.451706000 | C | 6.019095000  | 13.777007000 | 3.538619000  |
| C  | 12.634216000 | 17.581840000 | 3.403797000  | C | 4.696388000  | 14.212580000 | 3.284166000  |
| H  | 13.186661000 | 18.393389000 | 3.869956000  | C | 6.813395000  | 14.545112000 | 4.426259000  |
| C  | 13.220230000 | 16.321998000 | 3.262287000  | C | 4.196371000  | 15.352596000 | 3.904984000  |
| H  | 14.236097000 | 16.151196000 | 3.609367000  | C | 6.303918000  | 15.677435000 | 5.049255000  |

|   |             |              |             |   |             |              |              |
|---|-------------|--------------|-------------|---|-------------|--------------|--------------|
| C | 4.991588000 | 16.086215000 | 4.790882000 | C | 3.160010000 | 9.584564000  | 0.803447000  |
| H | 4.067703000 | 13.663936000 | 2.594268000 | C | 2.629774000 | 10.433473000 | 2.998879000  |
| H | 7.837207000 | 14.234149000 | 4.617171000 | C | 2.266600000 | 9.696157000  | 1.873192000  |
| H | 3.179961000 | 15.672875000 | 3.694461000 | H | 5.103329000 | 10.096414000 | 0.037116000  |
| H | 6.930456000 | 16.247017000 | 5.729438000 | H | 4.147791000 | 11.631763000 | 3.940173000  |
| H | 4.592689000 | 16.974615000 | 5.272312000 | H | 2.898160000 | 8.990613000  | -0.067705000 |
| C | 4.755025000 | 11.001399000 | 1.968233000 | H | 1.952541000 | 10.508317000 | 3.845325000  |
| C | 4.398865000 | 10.219710000 | 0.856344000 | H | 1.301551000 | 9.198780000  | 1.832910000  |
| C | 3.869293000 | 11.078757000 | 3.049262000 |   |             |              |              |

**TS-trans (in Figure S20)**

|    |              |              |              |   |              |              |              |
|----|--------------|--------------|--------------|---|--------------|--------------|--------------|
| Ru | 8.284260000  | 11.921760000 | 0.429746000  | C | 12.826876000 | 17.595078000 | 3.138143000  |
| N  | 8.927584000  | 13.709937000 | -0.217461000 | H | 13.431749000 | 18.410170000 | 3.526630000  |
| N  | 7.813129000  | 11.841294000 | -1.476347000 | C | 13.383724000 | 16.325802000 | 2.966040000  |
| C  | 8.018106000  | 12.979608000 | -2.242387000 | H | 14.428494000 | 16.151023000 | 3.210117000  |
| N  | 9.712811000  | 11.972550000 | 1.825555000  | C | 12.607913000 | 15.279660000 | 2.466935000  |
| C  | 9.997609000  | 10.930264000 | 2.702712000  | H | 13.053301000 | 14.301407000 | 2.312822000  |
| C  | 7.638264000  | 9.078581000  | -0.478223000 | N | 6.513850000  | 12.566935000 | 1.107154000  |
| C  | 8.750201000  | 9.105727000  | 1.490235000  | C | 5.955868000  | 13.732933000 | 0.477596000  |
| C  | 8.678640000  | 14.019667000 | -1.533312000 | C | 5.123531000  | 13.621911000 | -0.642576000 |
| C  | 9.796929000  | 14.609808000 | 0.323945000  | C | 6.316102000  | 15.002925000 | 0.938063000  |
| N  | 8.210655000  | 9.899822000  | 0.494054000  | C | 4.646871000  | 14.774607000 | -1.270407000 |
| C  | 7.323348000  | 10.820338000 | -2.255029000 | C | 5.839211000  | 16.147024000 | 0.299833000  |
| C  | 10.045437000 | 15.615239000 | -0.688404000 | C | 4.996116000  | 16.042936000 | -0.806040000 |
| H  | 10.692216000 | 16.473791000 | -0.571784000 | C | 10.018039000 | 8.592824000  | 3.563376000  |
| C  | 10.784524000 | 11.474711000 | 3.771762000  | C | 9.108580000  | 7.828896000  | 4.309289000  |
| H  | 11.134611000 | 10.922736000 | 4.632214000  | C | 11.385527000 | 8.364236000  | 3.795312000  |
| C  | 10.416755000 | 14.376869000 | 1.578016000  | C | 9.540943000  | 6.889552000  | 5.248921000  |
| C  | 11.489855000 | 17.810513000 | 2.798616000  | C | 11.811955000 | 7.427226000  | 4.732568000  |
| H  | 11.047239000 | 18.795377000 | 2.923836000  | C | 10.903445000 | 6.664537000  | 5.487389000  |
| C  | 10.990049000 | 12.809058000 | 3.515905000  | H | 8.042094000  | 7.965447000  | 4.149465000  |
| H  | 11.541721000 | 13.503544000 | 4.133432000  | H | 12.120142000 | 8.922507000  | 3.221976000  |
| C  | 11.255972000 | 15.477467000 | 2.133326000  | H | 8.790636000  | 6.330460000  | 5.797509000  |
| C  | 9.553206000  | 9.591613000  | 2.552683000  | H | 12.880664000 | 7.283386000  | 4.868224000  |
| C  | 7.179672000  | 9.502392000  | -1.753777000 | C | 11.419568000 | 5.637481000  | 6.510347000  |
| C  | 8.428549000  | 7.733838000  | 1.183229000  | C | 12.283705000 | 6.357793000  | 7.573021000  |
| H  | 8.727050000  | 6.875681000  | 1.768371000  | H | 12.667757000 | 5.637471000  | 8.305786000  |
| C  | 7.169174000  | 11.358200000 | -3.580996000 | H | 13.143564000 | 6.865641000  | 7.123620000  |
| H  | 6.801040000  | 10.809562000 | -4.437131000 | H | 11.696039000 | 7.109983000  | 8.111974000  |
| C  | 7.736961000  | 7.721030000  | 0.000368000  | C | 12.281419000 | 4.576562000  | 5.784529000  |
| H  | 7.370182000  | 6.849055000  | -0.522213000 | H | 12.664708000 | 3.839994000  | 6.501415000  |
| C  | 7.342653000  | 7.385120000  | -3.136312000 | H | 11.692200000 | 4.042501000  | 5.030319000  |
| H  | 8.366421000  | 7.261569000  | -2.795508000 | H | 13.141518000 | 5.026827000  | 5.277908000  |
| C  | 10.712873000 | 16.764676000 | 2.299142000  | C | 10.273931000 | 4.908104000  | 7.238147000  |
| H  | 9.675950000  | 16.943501000 | 2.030390000  | H | 9.639052000  | 4.347887000  | 6.542128000  |
| C  | 9.357892000  | 15.247544000 | -1.827679000 | H | 10.688715000 | 4.190842000  | 7.955367000  |
| H  | 9.367889000  | 15.755785000 | -2.783330000 | H | 9.637571000  | 5.603242000  | 7.798044000  |
| C  | 7.596403000  | 12.677933000 | -3.569071000 | H | 4.869735000  | 12.646377000 | -1.036081000 |
| H  | 7.636561000  | 13.349144000 | -4.417299000 | H | 6.988874000  | 15.085047000 | 1.784449000  |
| C  | 10.352751000 | 13.137270000 | 2.272876000  | H | 4.628160000  | 16.931923000 | -1.303157000 |
| C  | 4.733964000  | 7.727458000  | -4.059556000 | C | 3.701533000  | 14.637151000 | -2.434957000 |
| H  | 3.717281000  | 7.868783000  | -4.417463000 | F | 3.760560000  | 15.705741000 | -3.259333000 |
| C  | 6.599228000  | 8.490178000  | -2.688306000 | F | 3.966804000  | 13.537232000 | -3.169920000 |
| C  | 5.480869000  | 6.628036000  | -4.487038000 | F | 2.416964000  | 14.532303000 | -2.018687000 |
| H  | 5.050443000  | 5.909508000  | -5.179494000 | C | 6.287178000  | 17.488216000 | 0.813976000  |
| C  | 6.788045000  | 6.462511000  | -4.024265000 | F | 7.603154000  | 17.700081000 | 0.573536000  |
| H  | 7.382833000  | 5.617956000  | -4.362604000 | F | 5.608261000  | 18.508009000 | 0.251465000  |
| C  | 5.288942000  | 8.650106000  | -3.171471000 | F | 6.123472000  | 17.580406000 | 2.155618000  |
| H  | 4.705454000  | 9.505668000  | -2.842222000 | C | 5.581983000  | 11.637344000 | 1.841120000  |

|   |             |              |             |   |             |              |              |
|---|-------------|--------------|-------------|---|-------------|--------------|--------------|
| C | 5.802567000 | 12.595548000 | 2.937339000 | H | 8.343978000 | 12.063076000 | 7.597106000  |
| H | 6.136269000 | 10.711319000 | 1.976111000 | C | 4.202889000 | 11.345794000 | 1.302895000  |
| H | 5.256964000 | 13.528872000 | 2.856618000 | C | 4.046731000 | 10.267668000 | 0.417654000  |
| C | 6.555726000 | 12.420728000 | 4.149528000 | C | 3.076691000 | 12.096052000 | 1.662484000  |
| C | 7.085841000 | 11.178801000 | 4.562696000 | C | 2.793258000 | 9.959433000  | -0.109742000 |
| C | 6.698889000 | 13.533622000 | 5.014269000 | C | 1.820844000 | 11.785794000 | 1.136756000  |
| C | 7.722453000 | 11.056711000 | 5.792987000 | C | 1.676786000 | 10.720778000 | 0.246729000  |
| C | 7.335093000 | 13.406398000 | 6.241476000 | H | 4.913847000 | 9.673686000  | 0.139375000  |
| C | 7.847115000 | 12.164959000 | 6.636363000 | H | 3.169847000 | 12.923552000 | 2.359617000  |
| H | 6.998761000 | 10.311666000 | 3.917684000 | H | 2.689900000 | 9.121453000  | -0.793542000 |
| H | 6.292783000 | 14.495530000 | 4.710514000 | H | 0.956177000 | 12.377366000 | 1.424409000  |
| H | 8.128811000 | 10.094787000 | 6.090271000 | H | 0.699343000 | 10.481323000 | -0.162789000 |
| H | 7.432634000 | 14.269958000 | 6.893055000 |   |             |              |              |

**P-cis (in Figure S20)**

|    |              |              |              |   |              |              |              |
|----|--------------|--------------|--------------|---|--------------|--------------|--------------|
| Ru | 8.390057000  | 11.861722000 | 0.093802000  | C | 6.894795000  | 5.984133000  | -3.721077000 |
| N  | 8.896004000  | 13.619495000 | -0.737474000 | H | 7.527967000  | 5.156394000  | -4.029967000 |
| N  | 7.764596000  | 11.609383000 | -1.742694000 | C | 5.291477000  | 8.125374000  | -2.939756000 |
| C  | 7.847231000  | 12.690111000 | -2.610405000 | H | 4.663687000  | 8.956674000  | -2.630217000 |
| N  | 9.812239000  | 12.110730000 | 1.455299000  | C | 13.074750000 | 17.757954000 | 1.924561000  |
| C  | 10.089066000 | 11.196990000 | 2.469025000  | H | 13.727671000 | 18.588324000 | 2.180203000  |
| C  | 7.756108000  | 8.940065000  | -0.465962000 | C | 13.590282000 | 16.463970000 | 1.820941000  |
| C  | 8.874828000  | 9.211377000  | 1.478769000  | H | 14.649455000 | 16.283914000 | 1.986291000  |
| C  | 8.531428000  | 13.810406000 | -2.044982000 | C | 12.752013000 | 15.398240000 | 1.494202000  |
| C  | 9.783884000  | 14.576539000 | -0.342245000 | H | 13.160458000 | 14.396525000 | 1.397960000  |
| N  | 8.337417000  | 9.866650000  | 0.392392000  | N | 6.531949000  | 12.426040000 | 0.932435000  |
| C  | 7.262403000  | 10.500740000 | -2.384525000 | C | 6.289970000  | 13.848986000 | 0.896434000  |
| C  | 9.931326000  | 15.494945000 | -1.454888000 | C | 5.637091000  | 14.447407000 | -0.181094000 |
| H  | 10.570501000 | 16.366983000 | -1.467394000 | C | 6.838736000  | 14.644939000 | 1.909515000  |
| C  | 10.880447000 | 11.882410000 | 3.451476000  | C | 5.514467000  | 15.838131000 | -0.229014000 |
| H  | 11.230971000 | 11.455314000 | 4.380387000  | C | 6.706180000  | 16.029254000 | 1.848820000  |
| C  | 10.483563000 | 14.470837000 | 0.887711000  | C | 6.038777000  | 16.637446000 | 0.783087000  |
| C  | 11.715099000 | 17.976815000 | 1.695362000  | C | 10.066962000 | 9.001933000  | 3.648596000  |
| H  | 11.301478000 | 18.978421000 | 1.779310000  | C | 9.123586000  | 8.380574000  | 4.478556000  |
| C  | 11.103660000 | 13.164571000 | 3.003584000  | C | 11.423749000 | 8.786816000  | 3.944731000  |
| H  | 11.669522000 | 13.932539000 | 3.512163000  | C | 9.514015000  | 7.589568000  | 5.561521000  |
| C  | 11.379735000 | 15.602915000 | 1.264227000  | C | 11.808176000 | 7.997506000  | 5.025026000  |
| C  | 9.641040000  | 9.847973000  | 2.491985000  | C | 10.865675000 | 7.379385000  | 5.865761000  |
| C  | 7.215754000  | 9.228999000  | -1.750228000 | H | 8.064626000  | 8.518285000  | 4.274294000  |
| C  | 8.576401000  | 7.804228000  | 1.334528000  | H | 12.182620000 | 9.237621000  | 3.311397000  |
| H  | 8.884175000  | 7.026465000  | 2.019109000  | H | 8.739687000  | 7.138913000  | 6.172876000  |
| C  | 6.962194000  | 10.918762000 | -3.726781000 | H | 12.869999000 | 7.857029000  | 5.209300000  |
| H  | 6.546046000  | 10.287835000 | -4.500667000 | C | 11.336682000 | 6.519734000  | 7.052482000  |
| C  | 7.887788000  | 7.643206000  | 0.161396000  | C | 12.188095000 | 7.387218000  | 8.010231000  |
| H  | 7.533235000  | 6.711557000  | -0.256720000 | H | 12.539530000 | 6.787002000  | 8.858617000  |
| C  | 7.435234000  | 7.018530000  | -2.956231000 | H | 13.068424000 | 7.803378000  | 7.509324000  |
| H  | 8.485088000  | 6.997837000  | -2.678258000 | H | 11.601745000 | 8.224558000  | 8.405796000  |
| C  | 10.876650000 | 16.911341000 | 1.365897000  | C | 12.194930000 | 5.343439000  | 6.528459000  |
| H  | 9.819796000  | 17.090536000 | 1.200297000  | H | 12.542519000 | 4.722900000  | 7.363802000  |
| C  | 9.160396000  | 15.020501000 | -2.497299000 | H | 11.615321000 | 4.707091000  | 5.849963000  |
| H  | 9.080054000  | 15.447557000 | -3.488875000 | H | 13.077739000 | 5.694811000  | 5.984299000  |
| C  | 7.321040000  | 12.257654000 | -3.859976000 | C | 10.159710000 | 5.933494000  | 7.855539000  |
| H  | 7.249322000  | 12.853093000 | -4.761283000 | H | 9.532139000  | 5.277801000  | 7.241049000  |
| C  | 10.454188000 | 13.324604000 | 1.734282000  | H | 10.544447000 | 5.335063000  | 8.689217000  |
| C  | 4.750310000  | 7.090313000  | -3.703731000 | H | 9.523042000  | 6.718810000  | 8.278876000  |
| H  | 3.701841000  | 7.122902000  | -3.988809000 | H | 5.255093000  | 13.849069000 | -0.994409000 |
| C  | 6.640901000  | 8.103871000  | -2.549753000 | H | 7.383615000  | 14.186880000 | 2.725271000  |
| C  | 5.549999000  | 6.015281000  | -4.096425000 | H | 5.953078000  | 17.716477000 | 0.731294000  |
| H  | 5.129507000  | 5.209309000  | -4.691951000 | C | 4.762608000  | 16.470627000 | -1.371256000 |

|   |             |              |              |   |             |              |              |
|---|-------------|--------------|--------------|---|-------------|--------------|--------------|
| F | 5.183307000 | 17.729665000 | -1.612828000 | H | 4.057671000 | 13.604399000 | 2.498428000  |
| F | 4.898569000 | 15.765077000 | -2.514240000 | H | 6.809248000 | 11.023523000 | 4.576904000  |
| F | 3.436131000 | 16.540523000 | -1.108163000 | H | 3.278458000 | 14.498015000 | 4.645261000  |
| C | 7.245764000 | 16.887998000 | 2.962027000  | H | 6.008369000 | 11.911712000 | 6.735528000  |
| F | 7.778783000 | 18.037084000 | 2.481430000  | H | 4.234813000 | 13.661476000 | 6.784056000  |
| F | 6.270238000 | 17.246498000 | 3.828302000  | C | 4.022326000 | 11.638102000 | 0.340365000  |
| F | 8.201795000 | 16.260144000 | 3.673095000  | C | 3.786372000 | 11.798924000 | -1.037555000 |
| C | 5.428093000 | 11.385762000 | 0.797636000  | C | 2.923499000 | 11.525914000 | 1.201905000  |
| C | 6.054856000 | 11.612027000 | 2.136090000  | C | 2.487422000 | 11.916726000 | -1.527189000 |
| H | 5.849529000 | 10.525325000 | 0.285491000  | C | 1.620612000 | 11.632296000 | 0.706987000  |
| H | 6.807614000 | 10.868749000 | 2.378069000  | C | 1.398990000 | 11.842137000 | -0.653195000 |
| C | 5.485511000 | 12.230056000 | 3.373514000  | H | 4.624913000 | 11.816324000 | -1.729861000 |
| C | 4.489676000 | 13.221858000 | 3.415046000  | H | 3.079752000 | 11.338218000 | 2.257748000  |
| C | 6.024486000 | 11.775765000 | 4.589593000  | H | 2.325246000 | 12.054907000 | -2.592428000 |
| C | 4.046037000 | 13.729353000 | 4.635673000  | H | 0.780414000 | 11.544061000 | 1.390168000  |
| C | 5.575869000 | 12.280466000 | 5.809849000  | H | 0.385614000 | 11.929805000 | -1.034960000 |
| C | 4.583668000 | 13.260748000 | 5.836472000  |   |             |              |              |

### P-trans (in Figure S20)

|    |              |              |              |   |              |              |              |
|----|--------------|--------------|--------------|---|--------------|--------------|--------------|
| Ru | 8.219548000  | 11.947961000 | 0.640831000  | H | 3.678059000  | 7.806549000  | -4.193982000 |
| N  | 8.868910000  | 13.721226000 | -0.064926000 | C | 6.506349000  | 8.445563000  | -2.382865000 |
| N  | 7.740086000  | 11.821540000 | -1.267239000 | C | 5.423096000  | 6.538818000  | -4.159829000 |
| C  | 7.954200000  | 12.930151000 | -2.065830000 | H | 5.006277000  | 5.803406000  | -4.842770000 |
| N  | 9.678987000  | 12.022356000 | 1.995263000  | C | 6.711461000  | 6.372527000  | -3.647120000 |
| C  | 10.009863000 | 10.989633000 | 2.871037000  | H | 7.306354000  | 5.510454000  | -3.937688000 |
| C  | 7.537829000  | 9.088408000  | -0.183169000 | C | 5.216877000  | 8.606588000  | -2.919375000 |
| C  | 8.706697000  | 9.151632000  | 1.749423000  | H | 4.635680000  | 9.482379000  | -2.644722000 |
| C  | 8.622029000  | 13.990294000 | -1.388626000 | C | 12.822355000 | 17.680302000 | 3.123662000  |
| C  | 9.744080000  | 14.633837000 | 0.441471000  | H | 13.429306000 | 18.507324000 | 3.482531000  |
| N  | 8.135466000  | 9.928771000  | 0.759472000  | C | 13.392938000 | 16.419690000 | 2.933596000  |
| C  | 7.231756000  | 10.784791000 | -2.009335000 | H | 14.450001000 | 16.263993000 | 3.133591000  |
| C  | 9.990707000  | 15.609440000 | -0.598540000 | C | 12.614569000 | 15.357651000 | 2.473192000  |
| H  | 10.642321000 | 16.467768000 | -0.510181000 | H | 13.069551000 | 14.386206000 | 2.304771000  |
| C  | 10.861696000 | 11.540017000 | 3.883957000  | N | 6.226630000  | 12.630532000 | 1.116437000  |
| H  | 11.256744000 | 10.993984000 | 4.728627000  | C | 5.811049000  | 13.836314000 | 0.432372000  |
| C  | 10.398145000 | 14.418224000 | 1.682324000  | C | 5.224170000  | 13.784989000 | -0.834007000 |
| C  | 11.468768000 | 17.871991000 | 2.839978000  | C | 6.077986000  | 15.069794000 | 1.026952000  |
| H  | 11.015554000 | 18.850203000 | 2.978627000  | C | 4.889518000  | 14.975009000 | -1.482516000 |
| C  | 11.063813000 | 12.869351000 | 3.599678000  | C | 5.760114000  | 16.251595000 | 0.359079000  |
| H  | 11.656642000 | 13.565417000 | 4.176133000  | C | 5.156966000  | 16.212938000 | -0.897046000 |
| C  | 11.246905000 | 15.531716000 | 2.196839000  | C | 10.103160000 | 8.660571000  | 3.743861000  |
| C  | 9.559174000  | 9.650412000  | 2.763845000  | C | 9.261019000  | 7.901844000  | 4.567613000  |
| C  | 7.076350000  | 9.481259000  | -1.467292000 | C | 11.485729000 | 8.433337000  | 3.856568000  |
| C  | 8.367387000  | 7.774771000  | 1.483521000  | C | 9.773516000  | 6.962922000  | 5.466336000  |
| H  | 8.679243000  | 6.928754000  | 2.079067000  | C | 11.991922000 | 7.499036000  | 4.755604000  |
| C  | 7.079970000  | 11.282072000 | -3.351562000 | C | 11.151456000 | 6.737184000  | 5.586020000  |
| H  | 6.698097000  | 10.714080000 | -4.188722000 | H | 8.187438000  | 8.053129000  | 4.507073000  |
| C  | 7.638594000  | 7.740283000  | 0.324943000  | H | 12.168321000 | 8.990587000  | 3.221049000  |
| H  | 7.250172000  | 6.859094000  | -0.165381000 | H | 9.073863000  | 6.406560000  | 6.080990000  |
| C  | 7.248415000  | 7.316505000  | -2.771315000 | H | 13.068420000 | 7.356480000  | 4.799781000  |
| H  | 8.259333000  | 7.192025000  | -2.395077000 | C | 11.756010000 | 5.715037000  | 6.564814000  |
| C  | 10.689659000 | 16.810607000 | 2.378064000  | C | 12.684667000 | 6.447210000  | 7.563303000  |
| H  | 9.639806000  | 16.969659000 | 2.149416000  | H | 13.129007000 | 5.732836000  | 8.267554000  |
| C  | 9.300391000  | 15.206412000 | -1.725126000 | H | 13.503524000 | 6.965286000  | 7.053039000  |
| H  | 9.308164000  | 15.683721000 | -2.696648000 | H | 12.127444000 | 7.192863000  | 8.142218000  |
| C  | 7.523737000  | 12.596472000 | -3.381924000 | C | 12.578160000 | 4.667265000  | 5.777099000  |
| H  | 7.563722000  | 13.243100000 | -4.248787000 | H | 13.018655000 | 3.933396000  | 6.463399000  |
| C  | 10.361026000 | 13.188937000 | 2.391841000  | H | 11.944717000 | 4.128461000  | 5.063214000  |
| C  | 4.679154000  | 7.662385000  | -3.795402000 | H | 13.396078000 | 5.129311000  | 5.214518000  |



|   |              |              |              |   |             |              |              |
|---|--------------|--------------|--------------|---|-------------|--------------|--------------|
| C | 10.677669000 | 4.967433000  | 7.372683000  | C | 7.249199000 | 12.972720000 | 4.358847000  |
| H | 9.999698000  | 4.402698000  | 6.722405000  | C | 6.741786000 | 10.493955000 | 5.533457000  |
| H | 11.155289000 | 4.252673000  | 8.052463000  | C | 7.850086000 | 12.640385000 | 5.571049000  |
| H | 10.076434000 | 5.651363000  | 7.982644000  | C | 7.593231000 | 11.401674000 | 6.163703000  |
| H | 5.038914000  | 12.832603000 | -1.313198000 | H | 5.484012000 | 10.112683000 | 3.827250000  |
| H | 6.557433000  | 15.109506000 | 1.998829000  | H | 7.449252000 | 13.941536000 | 3.909139000  |
| H | 4.907427000  | 17.131507000 | -1.414412000 | H | 6.532937000 | 9.532252000  | 5.993291000  |
| C | 4.184955000  | 14.930998000 | -2.814065000 | H | 8.517434000 | 13.348743000 | 6.052399000  |
| F | 4.579974000  | 15.942955000 | -3.617606000 | H | 8.055946000 | 11.145599000 | 7.112644000  |
| F | 4.407509000  | 13.775263000 | -3.470057000 | C | 3.803766000 | 11.520388000 | 0.854748000  |
| F | 2.844387000  | 15.052206000 | -2.663475000 | C | 3.467429000 | 10.418924000 | 0.051204000  |
| C | 6.140752000  | 17.562815000 | 0.992844000  | C | 2.828489000 | 12.498953000 | 1.099198000  |
| F | 7.464847000  | 17.813107000 | 0.857933000  | C | 2.192654000 | 10.302607000 | -0.502137000 |
| F | 5.481162000  | 18.603317000 | 0.445356000  | C | 1.555429000 | 12.385039000 | 0.541200000  |
| F | 5.880331000  | 17.564939000 | 2.320765000  | C | 1.233670000 | 11.288264000 | -0.261202000 |
| C | 5.177751000  | 11.553592000 | 1.434512000  | H | 4.212734000 | 9.650916000  | -0.137840000 |
| C | 5.633266000  | 12.473988000 | 2.500125000  | H | 3.054250000 | 13.357500000 | 1.724246000  |
| H | 5.679008000  | 10.592227000 | 1.412644000  | H | 1.950817000 | 9.441113000  | -1.118167000 |
| H | 4.956640000  | 13.304483000 | 2.696742000  | H | 0.812980000 | 13.153177000 | 0.738064000  |
| C | 6.402239000  | 12.060923000 | 3.713008000  | H | 0.240203000 | 11.201405000 | -0.692087000 |
| C | 6.153178000  | 10.819340000 | 4.310273000  |   |             |              |              |

## References

- 1 P. Y. Chan, W. M. Kwok, S. K. Lam, P. Chiu and D. L. Phillips, *J. Am. Chem. Soc.*, 2005, **127**, 8246–8247.
- 2 M. D. Li, C. S. Yeung, X. Guan, J. Ma, W. Li, C. Ma and D. L. Phillips, *Chem. Eur. J.*, 2011, **17**, 10935–10950.
- 3 Proteum2, *Bruker AXS, Madison, Wisconsin*, 1999.
- 4 G. Sheldrick, *Acta Crystallogr. A*, 2008, **64**, 112–122.
- 5 K. M. Carsch, I. M. DiMucci, D. A. Iovan, A. Li, S.-L. Zheng, C. J. Titus, S. J. Lee, K. D. Irwin, D. Nordlund, K. M. Lancaster and T. A. Betley, *Science*, 2019, **365**, 1138–1143.
- 6 H. Esaki, T. Kurita, Y. Fujiwara, T. Maegawa, Y. Monguchi and H. Sajiki, *J. Synth. Org. Chem. Jpn.*, 2007, **65**, 1179–1190.
- 7 S. Stoll and A. Schweiger, *J. Magn. Reson.*, 2006, **178**, 42–55.
- 8 S. M. Joshi, A. de Cózar, V. Gómez-Vallejo, J. Koziorowski, J. Llop and F. P. Cossío, *Chem. Commun.*, 2015, **51**, 8954–8957.
- 9 F. Sebest, L. Casarrubios, H. S. Rzepa, A. J. P. White and S. Díez-González, *Green Chem.*, 2018, **20**, 4023–4035.
- 10 K. D. Grimes, A. Gupte and C. C. Aldrich, *Synthesis*, 2010, **9**, 1441–1448.
- 11 M. R. Anneser, G. R. Elpitiya, J. Townsend, E. J. Johnson, X. B. Powers, J. F. DeJesus, K. D. Vogiatzis and D. M. Jenkins, *Angew. Chem. Int. Ed.*, 2019, **58**, 8115–8118.
- 12 C. J. Smith, C. D. Smith, N. Nikbin, S. V. Ley and I. R. Baxendale, *Org. Biomol. Chem.*, 2011, **9**, 1927–1937.
- 13 M. Kitamura, M. Yano, N. Tashiro, S. Miyagawa, M. Sando and T. Okauchi, *Eur. J. Org. Chem.*, 2011, 458–462.
- 14 L. Barr, S. F. Lincoln and C. J. Easton, *Supramol. Chem.*, 2005, **17**, 547–555.
- 15 S.-L. Abram, I. Monte-Pérez, F. F. Pfaff, E. Farquhar and K. Ray, *Chem. Commun.*, 2014, **50**, 9852–9854.
- 16 A. Reckziegel, M. Kour, B. Battistella, S. Mebs, K. Beuthert, R. Berger and C. G. Werncke, *Angew. Chem. Int. Ed.*, 2021, **60**, 15376–15380.
- 17 R. M. Wilson and A. Hengge, *J. Org. Chem.*, 1987, **52**, 2699–2707.
- 18 P. Sonzini, C. Damiano, D. Intriari, G. Manca and E. Gallo, *Adv. Synth. Catal.*, 2020, **362**, 2961–2969.
- 19 S. Rossi, A. Puglisi, M. Benaglia, D. M. Carminati, D. Intriari and E. Gallo, *Catal. Sci. Technol.*, 2016, **6**, 4700–4704.
- 20 Y.-D. Du, C.-Y. Zhou, W.-P. To, H.-X. Wang and C.-M. Che, *Chem. Sci.*, 2020, **11**, 4680–4686.
- 21 S. Fantauzzi, E. Gallo, A. Caselli, C. Piangiolino, F. Ragaini and S. Cenini, *Eur. J. Org. Chem.*, 2007, 6053–6059.
- 22 a) J. Feng, M. F. Lv, G. P. Lu and C. Cai, *Org. Chem. Front.* 2015, **2**, 60–64; b) D. Intriari, A. Caselli, F. Ragaini, S. Cenini and E. Gallo, *J. Porphyrins Phthalocyanines*, 2010, **14**, 732–740.
- 23 S. Fantauzzi, E. Gallo, A. Caselli, F. Ragaini, N. Casati, P. Macchi and S. Cenini, *Chem. Commun.*, 2009, 3952–3954.

- 24 X.-K. Jiang, *Acc. Chem. Res.*, 1997, **30**, 283–289.
- 25 C. Lee, W. Yang and R. G. Parr, *Phys. Rev. B*, 1988, **37**, 785–789.
- 26 A. D. Becke, *J. Chem. Phys.*, 1993, **98**, 1372–1377.
- 27 D. Andrae, U. Häußermann, M. Dolg, H. Stoll and H. Preuß, *Theor. Chim. Acta*, 1990, **77**, 123–141.
- 28 J. M. L. Martin and A. Sundermann, *J. Chem. Phys.*, 2001, **114**, 3408–3420.
- 29 T. Lu and F. Chen, *J. Comput. Chem.*, 2012, **33**, 580–592.
- 30 M. Cossi, G. Scalmani, N. Rega and V. Barone, *J. Chem. Phys.*, 2002, **117**, 43–54.
- 31 ADF2014, SCM, Theoretical Chemistry, Vrije Universiteit, Amsterdam, The Netherlands, <https://www.scm.com>
- 32 A. N. Walstrom, B. C. Fullmer, H. Fan, M. Pink, D. T. Buschhorn and K. G. Caulton, *Inorg. Chem.*, 2008, **47**, 9002–9009.
- 33 A. K. Burreed and A. J. Steedman, *J. Chem. Soc., Chem. Commun.*, 1995, 2109–2110.
- 34 Z. Guo, X. Guan, J.-S. Huang, W.-M. Tsui, Z. Lin and C.-M. Che, *Chem. - Eur. J.*, 2013, **19**, 11320–11331.
- 35 A. K. Singh, B. G. Levine, R. J. Staples and A. L. Odom, *Chem. Commun.*, 2013, **49**, 10799–10801.
- 36 A. Takaoka, L. C. H. Gerber and J. C. Peters, *Angew. Chem. Int. Ed.*, 2010, **49**, 4088–4091.
- 37 W.-M. Ng, X. Guo, W.-M. Cheung, Y.-M. So, M.-C. Chong, H. H.-Y. Sung, I. D. Williams, Z. Lin and W.-H. Leung, *Dalton Trans.*, 2019, **48**, 13315–13325.
